# Supplementary material for: Stigmatization from Work-Related COVID-19 Exposure: A Systematic Review with Meta-Analysis
Source: MDPI journal article supplement (doi:10.3390/ijerph18126183), 2021-06-08
Supplement: s1 [file s1]

| General                          | Exposure                                                                                                                                                                                                                                                                                                       | Outcome                                                                                                                                                                                                                       | Results                                                                                                                                                                                                                                                                                                                                                                                                                                                                                                                                                                                                                                                                                                                                                                                                                                                                                                                                                                                                                                                                                                                                                                                                                                                                 |                  |                    |                     |            |           |             |             |           |                   |             |             |            |                          |             |                           |       |                          |             |             |        |                             |             |             |       |            |     |           |           |      |       |    |           |           |         |     |           |           |      |       |    |         |           |        |     |           |           |      |       |    |           |           |
|----------------------------------|----------------------------------------------------------------------------------------------------------------------------------------------------------------------------------------------------------------------------------------------------------------------------------------------------------------|-------------------------------------------------------------------------------------------------------------------------------------------------------------------------------------------------------------------------------|-------------------------------------------------------------------------------------------------------------------------------------------------------------------------------------------------------------------------------------------------------------------------------------------------------------------------------------------------------------------------------------------------------------------------------------------------------------------------------------------------------------------------------------------------------------------------------------------------------------------------------------------------------------------------------------------------------------------------------------------------------------------------------------------------------------------------------------------------------------------------------------------------------------------------------------------------------------------------------------------------------------------------------------------------------------------------------------------------------------------------------------------------------------------------------------------------------------------------------------------------------------------------|------------------|--------------------|---------------------|------------|-----------|-------------|-------------|-----------|-------------------|-------------|-------------|------------|--------------------------|-------------|---------------------------|-------|--------------------------|-------------|-------------|--------|-----------------------------|-------------|-------------|-------|------------|-----|-----------|-----------|------|-------|----|-----------|-----------|---------|-----|-----------|-----------|------|-------|----|---------|-----------|--------|-----|-----------|-----------|------|-------|----|-----------|-----------|
| #<br>First Author, Year, Country | Describe how exposure was measured<br><br>Form of stigmatization:                                                                                                                                                                                                                                              | Describe how outcome was measured                                                                                                                                                                                             | Prevalence:<br><br>Association with stigmatization:                                                                                                                                                                                                                                                                                                                                                                                                                                                                                                                                                                                                                                                                                                                                                                                                                                                                                                                                                                                                                                                                                                                                                                                                                     |                  |                    |                     |            |           |             |             |           |                   |             |             |            |                          |             |                           |       |                          |             |             |        |                             |             |             |       |            |     |           |           |      |       |    |           |           |         |     |           |           |      |       |    |         |           |        |     |           |           |      |       |    |           |           |
| 7288<br>Chatterjee 2020, India   | One question: Have you been ostracized?<br><br>Form of stigmatization: <u>Self-stigma (perceived): social exclusion</u><br>“ostracized by friends, neighbor, and the society for working in the hospital for being exposed and spreading others“                                                               | Depression, Anxiety, and Stress Scale (DASS-21): depression, anxiety, stress (4-point Likert scale, 0 = “didn’t apply to me at all”, 3 = “much or mostly applied to me”) in the past 1 week                                   | Prevalence:<br>Tab.: Prevalence of depression, anxiety and stress <table><tr><td></td><td>Yes<br/>n (%)</td><td>No<br/>n (%)</td></tr><tr><td>Depression</td><td>53 (34.9)</td><td>99 (65.1)</td></tr><tr><td>Anxiety</td><td>60 (39.5)</td><td>92 (60.5)</td></tr><tr><td>Stress</td><td>50 (32.9)</td><td>102 (67.1)</td></tr></table><br>Association with stigmatization:<br>Tab1-3: Association between mental state and stigma experience <table><tr><td colspan="2"></td><td colspan="2">Have you been ostracized?</td><td>X<sup>2/t</sup></td><td>p</td></tr><tr><td colspan="2"></td><td>Yes<br/>n (%)</td><td>No<br/>n (%)</td><td></td><td></td></tr><tr><td rowspan="2">Depression</td><td>Yes</td><td>20 (37.7)</td><td>33 (62.3)</td><td rowspan="2">16.6</td><td rowspan="2">0.002</td></tr><tr><td>No</td><td>12 (12.1)</td><td>87 (87.9)</td></tr><tr><td rowspan="2">Anxiety</td><td>Yes</td><td>23 (38.3)</td><td>37 (61.7)</td><td rowspan="2">25.6</td><td rowspan="2">0.001</td></tr><tr><td>No</td><td>9 (9.8)</td><td>83 (90.2)</td></tr><tr><td rowspan="2">Stress</td><td>Yes</td><td>21 (42.0)</td><td>29 (58.0)</td><td rowspan="2">23.2</td><td rowspan="2">0.001</td></tr><tr><td>No</td><td>11 (10.8)</td><td>91 (89.2)</td></tr></table> |                  | Yes<br>n (%)       | No<br>n (%)         | Depression | 53 (34.9) | 99 (65.1)   | Anxiety     | 60 (39.5) | 92 (60.5)         | Stress      | 50 (32.9)   | 102 (67.1) |                          |             | Have you been ostracized? |       | X <sup>2/t</sup>         | p           |             |        | Yes<br>n (%)                | No<br>n (%) |             |       | Depression | Yes | 20 (37.7) | 33 (62.3) | 16.6 | 0.002 | No | 12 (12.1) | 87 (87.9) | Anxiety | Yes | 23 (38.3) | 37 (61.7) | 25.6 | 0.001 | No | 9 (9.8) | 83 (90.2) | Stress | Yes | 21 (42.0) | 29 (58.0) | 23.2 | 0.001 | No | 11 (10.8) | 91 (89.2) |
|                                  | Yes<br>n (%)                                                                                                                                                                                                                                                                                                   | No<br>n (%)                                                                                                                                                                                                                   |                                                                                                                                                                                                                                                                                                                                                                                                                                                                                                                                                                                                                                                                                                                                                                                                                                                                                                                                                                                                                                                                                                                                                                                                                                                                         |                  |                    |                     |            |           |             |             |           |                   |             |             |            |                          |             |                           |       |                          |             |             |        |                             |             |             |       |            |     |           |           |      |       |    |           |           |         |     |           |           |      |       |    |         |           |        |     |           |           |      |       |    |           |           |
| Depression                       | 53 (34.9)                                                                                                                                                                                                                                                                                                      | 99 (65.1)                                                                                                                                                                                                                     |                                                                                                                                                                                                                                                                                                                                                                                                                                                                                                                                                                                                                                                                                                                                                                                                                                                                                                                                                                                                                                                                                                                                                                                                                                                                         |                  |                    |                     |            |           |             |             |           |                   |             |             |            |                          |             |                           |       |                          |             |             |        |                             |             |             |       |            |     |           |           |      |       |    |           |           |         |     |           |           |      |       |    |         |           |        |     |           |           |      |       |    |           |           |
| Anxiety                          | 60 (39.5)                                                                                                                                                                                                                                                                                                      | 92 (60.5)                                                                                                                                                                                                                     |                                                                                                                                                                                                                                                                                                                                                                                                                                                                                                                                                                                                                                                                                                                                                                                                                                                                                                                                                                                                                                                                                                                                                                                                                                                                         |                  |                    |                     |            |           |             |             |           |                   |             |             |            |                          |             |                           |       |                          |             |             |        |                             |             |             |       |            |     |           |           |      |       |    |           |           |         |     |           |           |      |       |    |         |           |        |     |           |           |      |       |    |           |           |
| Stress                           | 50 (32.9)                                                                                                                                                                                                                                                                                                      | 102 (67.1)                                                                                                                                                                                                                    |                                                                                                                                                                                                                                                                                                                                                                                                                                                                                                                                                                                                                                                                                                                                                                                                                                                                                                                                                                                                                                                                                                                                                                                                                                                                         |                  |                    |                     |            |           |             |             |           |                   |             |             |            |                          |             |                           |       |                          |             |             |        |                             |             |             |       |            |     |           |           |      |       |    |           |           |         |     |           |           |      |       |    |         |           |        |     |           |           |      |       |    |           |           |
|                                  |                                                                                                                                                                                                                                                                                                                | Have you been ostracized?                                                                                                                                                                                                     |                                                                                                                                                                                                                                                                                                                                                                                                                                                                                                                                                                                                                                                                                                                                                                                                                                                                                                                                                                                                                                                                                                                                                                                                                                                                         | X <sup>2/t</sup> | p                  |                     |            |           |             |             |           |                   |             |             |            |                          |             |                           |       |                          |             |             |        |                             |             |             |       |            |     |           |           |      |       |    |           |           |         |     |           |           |      |       |    |         |           |        |     |           |           |      |       |    |           |           |
|                                  |                                                                                                                                                                                                                                                                                                                | Yes<br>n (%)                                                                                                                                                                                                                  | No<br>n (%)                                                                                                                                                                                                                                                                                                                                                                                                                                                                                                                                                                                                                                                                                                                                                                                                                                                                                                                                                                                                                                                                                                                                                                                                                                                             |                  |                    |                     |            |           |             |             |           |                   |             |             |            |                          |             |                           |       |                          |             |             |        |                             |             |             |       |            |     |           |           |      |       |    |           |           |         |     |           |           |      |       |    |         |           |        |     |           |           |      |       |    |           |           |
| Depression                       | Yes                                                                                                                                                                                                                                                                                                            | 20 (37.7)                                                                                                                                                                                                                     | 33 (62.3)                                                                                                                                                                                                                                                                                                                                                                                                                                                                                                                                                                                                                                                                                                                                                                                                                                                                                                                                                                                                                                                                                                                                                                                                                                                               | 16.6             | 0.002              |                     |            |           |             |             |           |                   |             |             |            |                          |             |                           |       |                          |             |             |        |                             |             |             |       |            |     |           |           |      |       |    |           |           |         |     |           |           |      |       |    |         |           |        |     |           |           |      |       |    |           |           |
|                                  | No                                                                                                                                                                                                                                                                                                             | 12 (12.1)                                                                                                                                                                                                                     | 87 (87.9)                                                                                                                                                                                                                                                                                                                                                                                                                                                                                                                                                                                                                                                                                                                                                                                                                                                                                                                                                                                                                                                                                                                                                                                                                                                               |                  |                    |                     |            |           |             |             |           |                   |             |             |            |                          |             |                           |       |                          |             |             |        |                             |             |             |       |            |     |           |           |      |       |    |           |           |         |     |           |           |      |       |    |         |           |        |     |           |           |      |       |    |           |           |
| Anxiety                          | Yes                                                                                                                                                                                                                                                                                                            | 23 (38.3)                                                                                                                                                                                                                     | 37 (61.7)                                                                                                                                                                                                                                                                                                                                                                                                                                                                                                                                                                                                                                                                                                                                                                                                                                                                                                                                                                                                                                                                                                                                                                                                                                                               | 25.6             | 0.001              |                     |            |           |             |             |           |                   |             |             |            |                          |             |                           |       |                          |             |             |        |                             |             |             |       |            |     |           |           |      |       |    |           |           |         |     |           |           |      |       |    |         |           |        |     |           |           |      |       |    |           |           |
|                                  | No                                                                                                                                                                                                                                                                                                             | 9 (9.8)                                                                                                                                                                                                                       | 83 (90.2)                                                                                                                                                                                                                                                                                                                                                                                                                                                                                                                                                                                                                                                                                                                                                                                                                                                                                                                                                                                                                                                                                                                                                                                                                                                               |                  |                    |                     |            |           |             |             |           |                   |             |             |            |                          |             |                           |       |                          |             |             |        |                             |             |             |       |            |     |           |           |      |       |    |           |           |         |     |           |           |      |       |    |         |           |        |     |           |           |      |       |    |           |           |
| Stress                           | Yes                                                                                                                                                                                                                                                                                                            | 21 (42.0)                                                                                                                                                                                                                     | 29 (58.0)                                                                                                                                                                                                                                                                                                                                                                                                                                                                                                                                                                                                                                                                                                                                                                                                                                                                                                                                                                                                                                                                                                                                                                                                                                                               | 23.2             | 0.001              |                     |            |           |             |             |           |                   |             |             |            |                          |             |                           |       |                          |             |             |        |                             |             |             |       |            |     |           |           |      |       |    |           |           |         |     |           |           |      |       |    |         |           |        |     |           |           |      |       |    |           |           |
|                                  | No                                                                                                                                                                                                                                                                                                             | 11 (10.8)                                                                                                                                                                                                                     | 91 (89.2)                                                                                                                                                                                                                                                                                                                                                                                                                                                                                                                                                                                                                                                                                                                                                                                                                                                                                                                                                                                                                                                                                                                                                                                                                                                               |                  |                    |                     |            |           |             |             |           |                   |             |             |            |                          |             |                           |       |                          |             |             |        |                             |             |             |       |            |     |           |           |      |       |    |           |           |         |     |           |           |      |       |    |         |           |        |     |           |           |      |       |    |           |           |
| 2030<br>Chew , 2020, Singapore   | Healthcare Workers Stigma Scale (HWSS), 12 items, 4-point Likert scale (1 =strongly disagree, 4= strongly agree)<br><br>4 subscales:<br>1. Self-stigma ( <i>Personalized stigma</i> )<br>2. Disclosure concerns<br>3. Concerns about public attitudes<br>4. Negative self-image<br><br>Form of stigmatization: | Perceived Stress: Perceived Stress Scale (PSS), 10 items, 5-point Likert scale (0=never, 4=very often)<br><br>Traumatic Stress: Impact of Event Scale-Revised (IES-R); 22 items, 5-point Likert scale (0=never, 4=very often) | Prevalence:<br>Tab. Prevalence of PSS and IES-R at baseline and follow-up <table><tr><td></td><td>Baseline (mean SD)</td><td>Follow-up (mean SD)</td><td>t-test (t)</td></tr><tr><td>PSS</td><td>28.1 (6.63)</td><td>27.0 (5.87)</td><td>2.084</td></tr><tr><td>IES-R total score</td><td>15.0 (14.6)</td><td>14.5 (14.4)</td><td>0.404</td></tr><tr><td>IES-R Intrusion subscale</td><td>0.72 (0.74)</td><td>0.67 (0.66)</td><td>0.765</td></tr><tr><td>IES-R Avoidance subscale</td><td>0.70 (0.70)</td><td>0.70 (0.70)</td><td>-0.133</td></tr><tr><td>IES-R Hyperarousal subscale</td><td>0.61 (0.70)</td><td>0.57 (0.73)</td><td>0.539</td></tr></table><br>Association with stigmatization:<br><br>Tab. Risk factors for mental health outcomes amongst residents in training from national healthcare group residencies at the 2nd time point (linear regression)                                                                                                                                                                                                                                                                                                                                                                                                |                  | Baseline (mean SD) | Follow-up (mean SD) | t-test (t) | PSS       | 28.1 (6.63) | 27.0 (5.87) | 2.084     | IES-R total score | 15.0 (14.6) | 14.5 (14.4) | 0.404      | IES-R Intrusion subscale | 0.72 (0.74) | 0.67 (0.66)               | 0.765 | IES-R Avoidance subscale | 0.70 (0.70) | 0.70 (0.70) | -0.133 | IES-R Hyperarousal subscale | 0.61 (0.70) | 0.57 (0.73) | 0.539 |            |     |           |           |      |       |    |           |           |         |     |           |           |      |       |    |         |           |        |     |           |           |      |       |    |           |           |
|                                  | Baseline (mean SD)                                                                                                                                                                                                                                                                                             | Follow-up (mean SD)                                                                                                                                                                                                           | t-test (t)                                                                                                                                                                                                                                                                                                                                                                                                                                                                                                                                                                                                                                                                                                                                                                                                                                                                                                                                                                                                                                                                                                                                                                                                                                                              |                  |                    |                     |            |           |             |             |           |                   |             |             |            |                          |             |                           |       |                          |             |             |        |                             |             |             |       |            |     |           |           |      |       |    |           |           |         |     |           |           |      |       |    |         |           |        |     |           |           |      |       |    |           |           |
| PSS                              | 28.1 (6.63)                                                                                                                                                                                                                                                                                                    | 27.0 (5.87)                                                                                                                                                                                                                   | 2.084                                                                                                                                                                                                                                                                                                                                                                                                                                                                                                                                                                                                                                                                                                                                                                                                                                                                                                                                                                                                                                                                                                                                                                                                                                                                   |                  |                    |                     |            |           |             |             |           |                   |             |             |            |                          |             |                           |       |                          |             |             |        |                             |             |             |       |            |     |           |           |      |       |    |           |           |         |     |           |           |      |       |    |         |           |        |     |           |           |      |       |    |           |           |
| IES-R total score                | 15.0 (14.6)                                                                                                                                                                                                                                                                                                    | 14.5 (14.4)                                                                                                                                                                                                                   | 0.404                                                                                                                                                                                                                                                                                                                                                                                                                                                                                                                                                                                                                                                                                                                                                                                                                                                                                                                                                                                                                                                                                                                                                                                                                                                                   |                  |                    |                     |            |           |             |             |           |                   |             |             |            |                          |             |                           |       |                          |             |             |        |                             |             |             |       |            |     |           |           |      |       |    |           |           |         |     |           |           |      |       |    |         |           |        |     |           |           |      |       |    |           |           |
| IES-R Intrusion subscale         | 0.72 (0.74)                                                                                                                                                                                                                                                                                                    | 0.67 (0.66)                                                                                                                                                                                                                   | 0.765                                                                                                                                                                                                                                                                                                                                                                                                                                                                                                                                                                                                                                                                                                                                                                                                                                                                                                                                                                                                                                                                                                                                                                                                                                                                   |                  |                    |                     |            |           |             |             |           |                   |             |             |            |                          |             |                           |       |                          |             |             |        |                             |             |             |       |            |     |           |           |      |       |    |           |           |         |     |           |           |      |       |    |         |           |        |     |           |           |      |       |    |           |           |
| IES-R Avoidance subscale         | 0.70 (0.70)                                                                                                                                                                                                                                                                                                    | 0.70 (0.70)                                                                                                                                                                                                                   | -0.133                                                                                                                                                                                                                                                                                                                                                                                                                                                                                                                                                                                                                                                                                                                                                                                                                                                                                                                                                                                                                                                                                                                                                                                                                                                                  |                  |                    |                     |            |           |             |             |           |                   |             |             |            |                          |             |                           |       |                          |             |             |        |                             |             |             |       |            |     |           |           |      |       |    |           |           |         |     |           |           |      |       |    |         |           |        |     |           |           |      |       |    |           |           |
| IES-R Hyperarousal subscale      | 0.61 (0.70)                                                                                                                                                                                                                                                                                                    | 0.57 (0.73)                                                                                                                                                                                                                   | 0.539                                                                                                                                                                                                                                                                                                                                                                                                                                                                                                                                                                                                                                                                                                                                                                                                                                                                                                                                                                                                                                                                                                                                                                                                                                                                   |                  |                    |                     |            |           |             |             |           |                   |             |             |            |                          |             |                           |       |                          |             |             |        |                             |             |             |       |            |     |           |           |      |       |    |           |           |         |     |           |           |      |       |    |         |           |        |     |           |           |      |       |    |           |           |

| General                            | Exposure                                                                                                                                                                                                                                                                                                                                                                                                                                                                                                                                                                                                                                                                 | Outcome                                                                                                                                                                                                                                                                                                                                                               | Results                                                                                                                                                                                                                                                                                                                                                                                                                                                                                                                                                                                                                                                                                                                                                                                                                                                                                                                                                                                                                                                                                                                                                                                                                                                                                                                                                                                                                                            |          |                              |                                |            |         |         |         |             |                     |        |         |             |         |    |      |          |        |                  |            |      |     |     |     |   |         |      |     |     |     |     |        |      |     |     |     |   |        |                                    |                                                   |                                                  |            |                     |                     |                     |
|------------------------------------|--------------------------------------------------------------------------------------------------------------------------------------------------------------------------------------------------------------------------------------------------------------------------------------------------------------------------------------------------------------------------------------------------------------------------------------------------------------------------------------------------------------------------------------------------------------------------------------------------------------------------------------------------------------------------|-----------------------------------------------------------------------------------------------------------------------------------------------------------------------------------------------------------------------------------------------------------------------------------------------------------------------------------------------------------------------|----------------------------------------------------------------------------------------------------------------------------------------------------------------------------------------------------------------------------------------------------------------------------------------------------------------------------------------------------------------------------------------------------------------------------------------------------------------------------------------------------------------------------------------------------------------------------------------------------------------------------------------------------------------------------------------------------------------------------------------------------------------------------------------------------------------------------------------------------------------------------------------------------------------------------------------------------------------------------------------------------------------------------------------------------------------------------------------------------------------------------------------------------------------------------------------------------------------------------------------------------------------------------------------------------------------------------------------------------------------------------------------------------------------------------------------------------|----------|------------------------------|--------------------------------|------------|---------|---------|---------|-------------|---------------------|--------|---------|-------------|---------|----|------|----------|--------|------------------|------------|------|-----|-----|-----|---|---------|------|-----|-----|-----|-----|--------|------|-----|-----|-----|---|--------|------------------------------------|---------------------------------------------------|--------------------------------------------------|------------|---------------------|---------------------|---------------------|
|                                    | <p><u>Self-stigma (internalized):</u><br/>negative self-image (feeling inferior to others due to occupation)</p> <p><u>Self-stigma (anticipated):</u><br/>own perceived consequences, fear of rejection, disclosure concerns (control the information or keeping occupation a secret), concerns about public attitudes (what most people think of HCWs)</p>                                                                                                                                                                                                                                                                                                              |                                                                                                                                                                                                                                                                                                                                                                       | <table><tr><th>Variable</th><th>B</th><th>β</th><th>95% CI</th></tr><tr><td>PSS</td><td>0.134</td><td>0.157</td><td>0.024–0.244</td></tr><tr><td>IES-R, PTS symptoms</td><td>0.477</td><td>0.228</td><td>0.241–0.714</td></tr></table>                                                                                                                                                                                                                                                                                                                                                                                                                                                                                                                                                                                                                                                                                                                                                                                                                                                                                                                                                                                                                                                                                                                                                                                                             | Variable | B                            | β                              | 95% CI     | PSS     | 0.134   | 0.157   | 0.024–0.244 | IES-R, PTS symptoms | 0.477  | 0.228   | 0.241–0.714 |         |    |      |          |        |                  |            |      |     |     |     |   |         |      |     |     |     |     |        |      |     |     |     |   |        |                                    |                                                   |                                                  |            |                     |                     |                     |
| Variable                           | B                                                                                                                                                                                                                                                                                                                                                                                                                                                                                                                                                                                                                                                                        | β                                                                                                                                                                                                                                                                                                                                                                     | 95% CI                                                                                                                                                                                                                                                                                                                                                                                                                                                                                                                                                                                                                                                                                                                                                                                                                                                                                                                                                                                                                                                                                                                                                                                                                                                                                                                                                                                                                                             |          |                              |                                |            |         |         |         |             |                     |        |         |             |         |    |      |          |        |                  |            |      |     |     |     |   |         |      |     |     |     |     |        |      |     |     |     |   |        |                                    |                                                   |                                                  |            |                     |                     |                     |
| PSS                                | 0.134                                                                                                                                                                                                                                                                                                                                                                                                                                                                                                                                                                                                                                                                    | 0.157                                                                                                                                                                                                                                                                                                                                                                 | 0.024–0.244                                                                                                                                                                                                                                                                                                                                                                                                                                                                                                                                                                                                                                                                                                                                                                                                                                                                                                                                                                                                                                                                                                                                                                                                                                                                                                                                                                                                                                        |          |                              |                                |            |         |         |         |             |                     |        |         |             |         |    |      |          |        |                  |            |      |     |     |     |   |         |      |     |     |     |     |        |      |     |     |     |   |        |                                    |                                                   |                                                  |            |                     |                     |                     |
| IES-R, PTS symptoms                | 0.477                                                                                                                                                                                                                                                                                                                                                                                                                                                                                                                                                                                                                                                                    | 0.228                                                                                                                                                                                                                                                                                                                                                                 | 0.241–0.714                                                                                                                                                                                                                                                                                                                                                                                                                                                                                                                                                                                                                                                                                                                                                                                                                                                                                                                                                                                                                                                                                                                                                                                                                                                                                                                                                                                                                                        |          |                              |                                |            |         |         |         |             |                     |        |         |             |         |    |      |          |        |                  |            |      |     |     |     |   |         |      |     |     |     |     |        |      |     |     |     |   |        |                                    |                                                   |                                                  |            |                     |                     |                     |
| 883<br>Do Duy,<br>2020,<br>Vietnam | <p>Stigma scale: self-developed instrument: 12 questions (4-point Likert scale), sum up score 0-36</p> <p>Items from group discussion with HCW and investigators, adaption of Berger's HIV Stigma Scale for terms and phrases (validity checked with COSMIN)</p> <p><b>Form of stigmatization:</b><br/><u>Self-stigma (anticipated):</u><br/>Feel unsafe to be a health worker, Feel blamed by relatives or friends, Try to hide being quarantined, Try to avoid going out</p> <p><u>Self-stigma (internalized):</u><br/>Feel guilty because of being isolated, Feel ashamed of being isolated</p> <p><u>Self-stigma (perceived):</u><br/>discrimination People talk</p> | <p>DASS-21: depression, anxiety, stress (4-point Likert scale, 0 = never, 3 = almost always)</p> <p>Depression (≥ 4): mild: 5-6; moderate: 7-10; severe: 11-13; extremely severe: ≥ 14</p> <p>Anxiety (≥ 3): mild: 4-5; moderate: 6-7; severe: 8-9; extremely severe: ≥ 10</p> <p>Stress (≥ 4): mild: 8-9; moderate: 10-12; severe: 13-16; extremely severe: ≥ 17</p> | <p><b>Prevalence:</b></p> <p><b>Table: S1: Descriptive statistics</b></p> <table><tr><th>DASS-21</th><th>Male (n= 11)<br/>Median (IQR)</th><th>Female (n= 60)<br/>Median (IQR)</th></tr><tr><td>Depression</td><td>2 (0-3)</td><td>1 (0-3)</td></tr><tr><td>Anxiety</td><td>1 (0-2)</td><td>1 (0-2)</td></tr><tr><td>Stress</td><td>3 (1-5)</td><td>2 (1-5)</td></tr></table> <p>No significant difference between males and females</p> <p><b>Figure S1: Prevalence of depression, anxiety and stress (in %)</b></p> <table><tr><th>DASS-21</th><th>no</th><th>mild</th><th>moderate</th><th>severe</th><th>Extremely severe</th></tr><tr><td>Depression</td><td>86.9</td><td>8.2</td><td>3.2</td><td>1.6</td><td>0</td></tr><tr><td>Anxiety</td><td>85.3</td><td>8.2</td><td>3.7</td><td>1.6</td><td>1.2</td></tr><tr><td>Stress</td><td>95.1</td><td>1.6</td><td>1.6</td><td>1.6</td><td>0</td></tr></table> <p><b>Association with stigmatization:</b><br/>Correlation between stigmatization and DASS-21 depression, anxiety and stress</p> <p><b>Table 1: Spearman rank correlation r-value (95% CI)</b></p> <table><tr><th>DAS-21</th><th>Self-stigma<br/>Negative self-image</th><th>Public stigma<br/>Disclosure &amp; personalized stigma</th><th>Public stigma<br/>Concerns about public attitudes</th></tr><tr><td>Depression</td><td>0.35<br/>(0.10-0.55)</td><td>0.32<br/>(0.08-0.53)</td><td>0.33<br/>(0.09-0.54)</td></tr></table> | DASS-21  | Male (n= 11)<br>Median (IQR) | Female (n= 60)<br>Median (IQR) | Depression | 2 (0-3) | 1 (0-3) | Anxiety | 1 (0-2)     | 1 (0-2)             | Stress | 3 (1-5) | 2 (1-5)     | DASS-21 | no | mild | moderate | severe | Extremely severe | Depression | 86.9 | 8.2 | 3.2 | 1.6 | 0 | Anxiety | 85.3 | 8.2 | 3.7 | 1.6 | 1.2 | Stress | 95.1 | 1.6 | 1.6 | 1.6 | 0 | DAS-21 | Self-stigma<br>Negative self-image | Public stigma<br>Disclosure & personalized stigma | Public stigma<br>Concerns about public attitudes | Depression | 0.35<br>(0.10-0.55) | 0.32<br>(0.08-0.53) | 0.33<br>(0.09-0.54) |
| DASS-21                            | Male (n= 11)<br>Median (IQR)                                                                                                                                                                                                                                                                                                                                                                                                                                                                                                                                                                                                                                             | Female (n= 60)<br>Median (IQR)                                                                                                                                                                                                                                                                                                                                        |                                                                                                                                                                                                                                                                                                                                                                                                                                                                                                                                                                                                                                                                                                                                                                                                                                                                                                                                                                                                                                                                                                                                                                                                                                                                                                                                                                                                                                                    |          |                              |                                |            |         |         |         |             |                     |        |         |             |         |    |      |          |        |                  |            |      |     |     |     |   |         |      |     |     |     |     |        |      |     |     |     |   |        |                                    |                                                   |                                                  |            |                     |                     |                     |
| Depression                         | 2 (0-3)                                                                                                                                                                                                                                                                                                                                                                                                                                                                                                                                                                                                                                                                  | 1 (0-3)                                                                                                                                                                                                                                                                                                                                                               |                                                                                                                                                                                                                                                                                                                                                                                                                                                                                                                                                                                                                                                                                                                                                                                                                                                                                                                                                                                                                                                                                                                                                                                                                                                                                                                                                                                                                                                    |          |                              |                                |            |         |         |         |             |                     |        |         |             |         |    |      |          |        |                  |            |      |     |     |     |   |         |      |     |     |     |     |        |      |     |     |     |   |        |                                    |                                                   |                                                  |            |                     |                     |                     |
| Anxiety                            | 1 (0-2)                                                                                                                                                                                                                                                                                                                                                                                                                                                                                                                                                                                                                                                                  | 1 (0-2)                                                                                                                                                                                                                                                                                                                                                               |                                                                                                                                                                                                                                                                                                                                                                                                                                                                                                                                                                                                                                                                                                                                                                                                                                                                                                                                                                                                                                                                                                                                                                                                                                                                                                                                                                                                                                                    |          |                              |                                |            |         |         |         |             |                     |        |         |             |         |    |      |          |        |                  |            |      |     |     |     |   |         |      |     |     |     |     |        |      |     |     |     |   |        |                                    |                                                   |                                                  |            |                     |                     |                     |
| Stress                             | 3 (1-5)                                                                                                                                                                                                                                                                                                                                                                                                                                                                                                                                                                                                                                                                  | 2 (1-5)                                                                                                                                                                                                                                                                                                                                                               |                                                                                                                                                                                                                                                                                                                                                                                                                                                                                                                                                                                                                                                                                                                                                                                                                                                                                                                                                                                                                                                                                                                                                                                                                                                                                                                                                                                                                                                    |          |                              |                                |            |         |         |         |             |                     |        |         |             |         |    |      |          |        |                  |            |      |     |     |     |   |         |      |     |     |     |     |        |      |     |     |     |   |        |                                    |                                                   |                                                  |            |                     |                     |                     |
| DASS-21                            | no                                                                                                                                                                                                                                                                                                                                                                                                                                                                                                                                                                                                                                                                       | mild                                                                                                                                                                                                                                                                                                                                                                  | moderate                                                                                                                                                                                                                                                                                                                                                                                                                                                                                                                                                                                                                                                                                                                                                                                                                                                                                                                                                                                                                                                                                                                                                                                                                                                                                                                                                                                                                                           | severe   | Extremely severe             |                                |            |         |         |         |             |                     |        |         |             |         |    |      |          |        |                  |            |      |     |     |     |   |         |      |     |     |     |     |        |      |     |     |     |   |        |                                    |                                                   |                                                  |            |                     |                     |                     |
| Depression                         | 86.9                                                                                                                                                                                                                                                                                                                                                                                                                                                                                                                                                                                                                                                                     | 8.2                                                                                                                                                                                                                                                                                                                                                                   | 3.2                                                                                                                                                                                                                                                                                                                                                                                                                                                                                                                                                                                                                                                                                                                                                                                                                                                                                                                                                                                                                                                                                                                                                                                                                                                                                                                                                                                                                                                | 1.6      | 0                            |                                |            |         |         |         |             |                     |        |         |             |         |    |      |          |        |                  |            |      |     |     |     |   |         |      |     |     |     |     |        |      |     |     |     |   |        |                                    |                                                   |                                                  |            |                     |                     |                     |
| Anxiety                            | 85.3                                                                                                                                                                                                                                                                                                                                                                                                                                                                                                                                                                                                                                                                     | 8.2                                                                                                                                                                                                                                                                                                                                                                   | 3.7                                                                                                                                                                                                                                                                                                                                                                                                                                                                                                                                                                                                                                                                                                                                                                                                                                                                                                                                                                                                                                                                                                                                                                                                                                                                                                                                                                                                                                                | 1.6      | 1.2                          |                                |            |         |         |         |             |                     |        |         |             |         |    |      |          |        |                  |            |      |     |     |     |   |         |      |     |     |     |     |        |      |     |     |     |   |        |                                    |                                                   |                                                  |            |                     |                     |                     |
| Stress                             | 95.1                                                                                                                                                                                                                                                                                                                                                                                                                                                                                                                                                                                                                                                                     | 1.6                                                                                                                                                                                                                                                                                                                                                                   | 1.6                                                                                                                                                                                                                                                                                                                                                                                                                                                                                                                                                                                                                                                                                                                                                                                                                                                                                                                                                                                                                                                                                                                                                                                                                                                                                                                                                                                                                                                | 1.6      | 0                            |                                |            |         |         |         |             |                     |        |         |             |         |    |      |          |        |                  |            |      |     |     |     |   |         |      |     |     |     |     |        |      |     |     |     |   |        |                                    |                                                   |                                                  |            |                     |                     |                     |
| DAS-21                             | Self-stigma<br>Negative self-image                                                                                                                                                                                                                                                                                                                                                                                                                                                                                                                                                                                                                                       | Public stigma<br>Disclosure & personalized stigma                                                                                                                                                                                                                                                                                                                     | Public stigma<br>Concerns about public attitudes                                                                                                                                                                                                                                                                                                                                                                                                                                                                                                                                                                                                                                                                                                                                                                                                                                                                                                                                                                                                                                                                                                                                                                                                                                                                                                                                                                                                   |          |                              |                                |            |         |         |         |             |                     |        |         |             |         |    |      |          |        |                  |            |      |     |     |     |   |         |      |     |     |     |     |        |      |     |     |     |   |        |                                    |                                                   |                                                  |            |                     |                     |                     |
| Depression                         | 0.35<br>(0.10-0.55)                                                                                                                                                                                                                                                                                                                                                                                                                                                                                                                                                                                                                                                      | 0.32<br>(0.08-0.53)                                                                                                                                                                                                                                                                                                                                                   | 0.33<br>(0.09-0.54)                                                                                                                                                                                                                                                                                                                                                                                                                                                                                                                                                                                                                                                                                                                                                                                                                                                                                                                                                                                                                                                                                                                                                                                                                                                                                                                                                                                                                                |          |                              |                                |            |         |         |         |             |                     |        |         |             |         |    |      |          |        |                  |            |      |     |     |     |   |         |      |     |     |     |     |        |      |     |     |     |   |        |                                    |                                                   |                                                  |            |                     |                     |                     |

| General                    | Exposure                                                                                                                           | Outcome                                                                                                                                                                                                                                                 | Results                                                                                                                                                                                                                                                                                                                                                                                                                                                                                                                                                                                                                                                                                                                                                                                                                                                                                                                                                                                                                                                                                                                                                                                                                                                                                                                                                                                                                                                                                                                                                                                                                                                |                     |                      |                     |          |                       |              |                |                           |                     |            |            |          |     |      |                  |                     |     |      |          |     |      |          |                                 |                              |                                       |         |                            |  |  |  |  |     |           |            |       |         |    |            |            |          |                                 |                              |                                       |         |                            |  |  |  |  |     |           |            |       |         |    |            |            |
|----------------------------|------------------------------------------------------------------------------------------------------------------------------------|---------------------------------------------------------------------------------------------------------------------------------------------------------------------------------------------------------------------------------------------------------|--------------------------------------------------------------------------------------------------------------------------------------------------------------------------------------------------------------------------------------------------------------------------------------------------------------------------------------------------------------------------------------------------------------------------------------------------------------------------------------------------------------------------------------------------------------------------------------------------------------------------------------------------------------------------------------------------------------------------------------------------------------------------------------------------------------------------------------------------------------------------------------------------------------------------------------------------------------------------------------------------------------------------------------------------------------------------------------------------------------------------------------------------------------------------------------------------------------------------------------------------------------------------------------------------------------------------------------------------------------------------------------------------------------------------------------------------------------------------------------------------------------------------------------------------------------------------------------------------------------------------------------------------------|---------------------|----------------------|---------------------|----------|-----------------------|--------------|----------------|---------------------------|---------------------|------------|------------|----------|-----|------|------------------|---------------------|-----|------|----------|-----|------|----------|---------------------------------|------------------------------|---------------------------------------|---------|----------------------------|--|--|--|--|-----|-----------|------------|-------|---------|----|------------|------------|----------|---------------------------------|------------------------------|---------------------------------------|---------|----------------------------|--|--|--|--|-----|-----------|------------|-------|---------|----|------------|------------|
|                            | behind back, People avoid touching and direct contact, People feel uncomfortable when around, Experienced discrimination actions   |                                                                                                                                                                                                                                                         | Anxiety                                                                                                                                                                                                                                                                                                                                                                                                                                                                                                                                                                                                                                                                                                                                                                                                                                                                                                                                                                                                                                                                                                                                                                                                                                                                                                                                                                                                                                                                                                                                                                                                                                                | 0.45<br>(0.23-0.63) | 0.36<br>(0.12-0.56)  | 0.39<br>(0.15-0.58) |          |                       |              |                |                           |                     |            |            |          |     |      |                  |                     |     |      |          |     |      |          |                                 |                              |                                       |         |                            |  |  |  |  |     |           |            |       |         |    |            |            |          |                                 |                              |                                       |         |                            |  |  |  |  |     |           |            |       |         |    |            |            |
|                            |                                                                                                                                    |                                                                                                                                                                                                                                                         | Stress                                                                                                                                                                                                                                                                                                                                                                                                                                                                                                                                                                                                                                                                                                                                                                                                                                                                                                                                                                                                                                                                                                                                                                                                                                                                                                                                                                                                                                                                                                                                                                                                                                                 | 0.32<br>(0.07-0.53) | 0.16<br>(-0.01-0.40) | 0.24<br>(-0.01-46)  |          |                       |              |                |                           |                     |            |            |          |     |      |                  |                     |     |      |          |     |      |          |                                 |                              |                                       |         |                            |  |  |  |  |     |           |            |       |         |    |            |            |          |                                 |                              |                                       |         |                            |  |  |  |  |     |           |            |       |         |    |            |            |
| 859 Elhadi 2020, Libya     | Stigmatization: single item “feeling stigmatized” (yes/no)<br><br><b>Form of stigmatization:</b><br><u>Self-stigma (perceived)</u> | Depressive symptoms: Hospital Anxiety and Depression Scale (HADS, borderline abnormal: score 8-10, abnormal: score 11-21)<br><br>Anxiety symptoms: Hospital Anxiety and Depression Scale (HADS, borderline abnormal: score 8-10, abnormal: score 11-21) | <b>Prevalence:</b><br><br><b>Table 2: Anxiety and depressive symptom levels grades among participants (in %)</b> <table><tr><th colspan="2">Outcome</th><th>n</th><th>%</th></tr><tr><td rowspan="2">Depressive symptoms</td><td>Borderline abnormal</td><td>236</td><td>31.7</td></tr><tr><td>Abnormal</td><td>420</td><td>56.4</td></tr><tr><td rowspan="2">Anxiety symptoms</td><td>Borderline abnormal</td><td>237</td><td>31.8</td></tr><tr><td>Abnormal</td><td>348</td><td>46.7</td></tr></table><br><b>Association with stigmatization:</b><br><br><b>Table 3: Prevalence of depressive symptoms and association with feeling stigmatized</b> <table><tr><th>Variable</th><th>No depressive symptoms<br/>n (%)</th><th>Depressive symptoms<br/>n (%)</th><th>χ<sup>2</sup> (Pearson's chi-square)</th><th>p-value</th></tr><tr><td><b>Feeling stigmatized</b></td><td></td><td></td><td></td><td></td></tr><tr><td>Yes</td><td>77 (23.7)</td><td>154 (36.7)</td><td rowspan="2">14.41</td><td rowspan="2">&lt; 0.001</td></tr><tr><td>No</td><td>248 (76.3)</td><td>266 (63.3)</td></tr></table><br><b>Table 4: Prevalence of anxiety symptoms and association with feeling stigmatized</b> <table><tr><th>Variable</th><th>No depressive symptoms<br/>n (%)</th><th>Depressive symptoms<br/>n (%)</th><th>χ<sup>2</sup> (Pearson's chi-square)</th><th>p-value</th></tr><tr><td><b>Feeling stigmatized</b></td><td></td><td></td><td></td><td></td></tr><tr><td>Yes</td><td>95 (23.9)</td><td>136 (39.1)</td><td rowspan="2">19.89</td><td rowspan="2">&lt; 0.001</td></tr><tr><td>No</td><td>302 (76.1)</td><td>212 (60.9)</td></tr></table> |                     |                      |                     | Outcome  |                       | n            | %              | Depressive symptoms       | Borderline abnormal | 236        | 31.7       | Abnormal | 420 | 56.4 | Anxiety symptoms | Borderline abnormal | 237 | 31.8 | Abnormal | 348 | 46.7 | Variable | No depressive symptoms<br>n (%) | Depressive symptoms<br>n (%) | χ <sup>2</sup> (Pearson's chi-square) | p-value | <b>Feeling stigmatized</b> |  |  |  |  | Yes | 77 (23.7) | 154 (36.7) | 14.41 | < 0.001 | No | 248 (76.3) | 266 (63.3) | Variable | No depressive symptoms<br>n (%) | Depressive symptoms<br>n (%) | χ <sup>2</sup> (Pearson's chi-square) | p-value | <b>Feeling stigmatized</b> |  |  |  |  | Yes | 95 (23.9) | 136 (39.1) | 19.89 | < 0.001 | No | 302 (76.1) | 212 (60.9) |
| Outcome                    |                                                                                                                                    | n                                                                                                                                                                                                                                                       | %                                                                                                                                                                                                                                                                                                                                                                                                                                                                                                                                                                                                                                                                                                                                                                                                                                                                                                                                                                                                                                                                                                                                                                                                                                                                                                                                                                                                                                                                                                                                                                                                                                                      |                     |                      |                     |          |                       |              |                |                           |                     |            |            |          |     |      |                  |                     |     |      |          |     |      |          |                                 |                              |                                       |         |                            |  |  |  |  |     |           |            |       |         |    |            |            |          |                                 |                              |                                       |         |                            |  |  |  |  |     |           |            |       |         |    |            |            |
| Depressive symptoms        | Borderline abnormal                                                                                                                | 236                                                                                                                                                                                                                                                     | 31.7                                                                                                                                                                                                                                                                                                                                                                                                                                                                                                                                                                                                                                                                                                                                                                                                                                                                                                                                                                                                                                                                                                                                                                                                                                                                                                                                                                                                                                                                                                                                                                                                                                                   |                     |                      |                     |          |                       |              |                |                           |                     |            |            |          |     |      |                  |                     |     |      |          |     |      |          |                                 |                              |                                       |         |                            |  |  |  |  |     |           |            |       |         |    |            |            |          |                                 |                              |                                       |         |                            |  |  |  |  |     |           |            |       |         |    |            |            |
|                            | Abnormal                                                                                                                           | 420                                                                                                                                                                                                                                                     | 56.4                                                                                                                                                                                                                                                                                                                                                                                                                                                                                                                                                                                                                                                                                                                                                                                                                                                                                                                                                                                                                                                                                                                                                                                                                                                                                                                                                                                                                                                                                                                                                                                                                                                   |                     |                      |                     |          |                       |              |                |                           |                     |            |            |          |     |      |                  |                     |     |      |          |     |      |          |                                 |                              |                                       |         |                            |  |  |  |  |     |           |            |       |         |    |            |            |          |                                 |                              |                                       |         |                            |  |  |  |  |     |           |            |       |         |    |            |            |
| Anxiety symptoms           | Borderline abnormal                                                                                                                | 237                                                                                                                                                                                                                                                     | 31.8                                                                                                                                                                                                                                                                                                                                                                                                                                                                                                                                                                                                                                                                                                                                                                                                                                                                                                                                                                                                                                                                                                                                                                                                                                                                                                                                                                                                                                                                                                                                                                                                                                                   |                     |                      |                     |          |                       |              |                |                           |                     |            |            |          |     |      |                  |                     |     |      |          |     |      |          |                                 |                              |                                       |         |                            |  |  |  |  |     |           |            |       |         |    |            |            |          |                                 |                              |                                       |         |                            |  |  |  |  |     |           |            |       |         |    |            |            |
|                            | Abnormal                                                                                                                           | 348                                                                                                                                                                                                                                                     | 46.7                                                                                                                                                                                                                                                                                                                                                                                                                                                                                                                                                                                                                                                                                                                                                                                                                                                                                                                                                                                                                                                                                                                                                                                                                                                                                                                                                                                                                                                                                                                                                                                                                                                   |                     |                      |                     |          |                       |              |                |                           |                     |            |            |          |     |      |                  |                     |     |      |          |     |      |          |                                 |                              |                                       |         |                            |  |  |  |  |     |           |            |       |         |    |            |            |          |                                 |                              |                                       |         |                            |  |  |  |  |     |           |            |       |         |    |            |            |
| Variable                   | No depressive symptoms<br>n (%)                                                                                                    | Depressive symptoms<br>n (%)                                                                                                                                                                                                                            | χ <sup>2</sup> (Pearson's chi-square)                                                                                                                                                                                                                                                                                                                                                                                                                                                                                                                                                                                                                                                                                                                                                                                                                                                                                                                                                                                                                                                                                                                                                                                                                                                                                                                                                                                                                                                                                                                                                                                                                  | p-value             |                      |                     |          |                       |              |                |                           |                     |            |            |          |     |      |                  |                     |     |      |          |     |      |          |                                 |                              |                                       |         |                            |  |  |  |  |     |           |            |       |         |    |            |            |          |                                 |                              |                                       |         |                            |  |  |  |  |     |           |            |       |         |    |            |            |
| <b>Feeling stigmatized</b> |                                                                                                                                    |                                                                                                                                                                                                                                                         |                                                                                                                                                                                                                                                                                                                                                                                                                                                                                                                                                                                                                                                                                                                                                                                                                                                                                                                                                                                                                                                                                                                                                                                                                                                                                                                                                                                                                                                                                                                                                                                                                                                        |                     |                      |                     |          |                       |              |                |                           |                     |            |            |          |     |      |                  |                     |     |      |          |     |      |          |                                 |                              |                                       |         |                            |  |  |  |  |     |           |            |       |         |    |            |            |          |                                 |                              |                                       |         |                            |  |  |  |  |     |           |            |       |         |    |            |            |
| Yes                        | 77 (23.7)                                                                                                                          | 154 (36.7)                                                                                                                                                                                                                                              | 14.41                                                                                                                                                                                                                                                                                                                                                                                                                                                                                                                                                                                                                                                                                                                                                                                                                                                                                                                                                                                                                                                                                                                                                                                                                                                                                                                                                                                                                                                                                                                                                                                                                                                  | < 0.001             |                      |                     |          |                       |              |                |                           |                     |            |            |          |     |      |                  |                     |     |      |          |     |      |          |                                 |                              |                                       |         |                            |  |  |  |  |     |           |            |       |         |    |            |            |          |                                 |                              |                                       |         |                            |  |  |  |  |     |           |            |       |         |    |            |            |
| No                         | 248 (76.3)                                                                                                                         | 266 (63.3)                                                                                                                                                                                                                                              |                                                                                                                                                                                                                                                                                                                                                                                                                                                                                                                                                                                                                                                                                                                                                                                                                                                                                                                                                                                                                                                                                                                                                                                                                                                                                                                                                                                                                                                                                                                                                                                                                                                        |                     |                      |                     |          |                       |              |                |                           |                     |            |            |          |     |      |                  |                     |     |      |          |     |      |          |                                 |                              |                                       |         |                            |  |  |  |  |     |           |            |       |         |    |            |            |          |                                 |                              |                                       |         |                            |  |  |  |  |     |           |            |       |         |    |            |            |
| Variable                   | No depressive symptoms<br>n (%)                                                                                                    | Depressive symptoms<br>n (%)                                                                                                                                                                                                                            | χ <sup>2</sup> (Pearson's chi-square)                                                                                                                                                                                                                                                                                                                                                                                                                                                                                                                                                                                                                                                                                                                                                                                                                                                                                                                                                                                                                                                                                                                                                                                                                                                                                                                                                                                                                                                                                                                                                                                                                  | p-value             |                      |                     |          |                       |              |                |                           |                     |            |            |          |     |      |                  |                     |     |      |          |     |      |          |                                 |                              |                                       |         |                            |  |  |  |  |     |           |            |       |         |    |            |            |          |                                 |                              |                                       |         |                            |  |  |  |  |     |           |            |       |         |    |            |            |
| <b>Feeling stigmatized</b> |                                                                                                                                    |                                                                                                                                                                                                                                                         |                                                                                                                                                                                                                                                                                                                                                                                                                                                                                                                                                                                                                                                                                                                                                                                                                                                                                                                                                                                                                                                                                                                                                                                                                                                                                                                                                                                                                                                                                                                                                                                                                                                        |                     |                      |                     |          |                       |              |                |                           |                     |            |            |          |     |      |                  |                     |     |      |          |     |      |          |                                 |                              |                                       |         |                            |  |  |  |  |     |           |            |       |         |    |            |            |          |                                 |                              |                                       |         |                            |  |  |  |  |     |           |            |       |         |    |            |            |
| Yes                        | 95 (23.9)                                                                                                                          | 136 (39.1)                                                                                                                                                                                                                                              | 19.89                                                                                                                                                                                                                                                                                                                                                                                                                                                                                                                                                                                                                                                                                                                                                                                                                                                                                                                                                                                                                                                                                                                                                                                                                                                                                                                                                                                                                                                                                                                                                                                                                                                  | < 0.001             |                      |                     |          |                       |              |                |                           |                     |            |            |          |     |      |                  |                     |     |      |          |     |      |          |                                 |                              |                                       |         |                            |  |  |  |  |     |           |            |       |         |    |            |            |          |                                 |                              |                                       |         |                            |  |  |  |  |     |           |            |       |         |    |            |            |
| No                         | 302 (76.1)                                                                                                                         | 212 (60.9)                                                                                                                                                                                                                                              |                                                                                                                                                                                                                                                                                                                                                                                                                                                                                                                                                                                                                                                                                                                                                                                                                                                                                                                                                                                                                                                                                                                                                                                                                                                                                                                                                                                                                                                                                                                                                                                                                                                        |                     |                      |                     |          |                       |              |                |                           |                     |            |            |          |     |      |                  |                     |     |      |          |     |      |          |                                 |                              |                                       |         |                            |  |  |  |  |     |           |            |       |         |    |            |            |          |                                 |                              |                                       |         |                            |  |  |  |  |     |           |            |       |         |    |            |            |
| 7273 Elhadi, 2020, Libya   | Stigmatization: single item “feeling stigmatized” (yes/no)<br><br><b>Form of stigmatization:</b><br><u>Self-stigma (perceived)</u> | Burnout: abbreviated Maslach Burnout Inventory (aMBI) (comprising three subscales: emotional exhaustion (EE), depersonalization (DP), and personal accomplishment (PA))                                                                                 | <b>Prevalence:</b><br><b>Text and Supplementary Material</b> <table><tr><th>Variable</th><th>Total sample<br/>n (%)</th><th>Men<br/>n (%)</th><th>Women<br/>n (%)</th></tr><tr><td>High emotional exhaustion</td><td>357 (67.1)</td><td>209 (71.1)</td><td>148 (62.2)</td></tr></table>                                                                                                                                                                                                                                                                                                                                                                                                                                                                                                                                                                                                                                                                                                                                                                                                                                                                                                                                                                                                                                                                                                                                                                                                                                                                                                                                                                |                     |                      |                     | Variable | Total sample<br>n (%) | Men<br>n (%) | Women<br>n (%) | High emotional exhaustion | 357 (67.1)          | 209 (71.1) | 148 (62.2) |          |     |      |                  |                     |     |      |          |     |      |          |                                 |                              |                                       |         |                            |  |  |  |  |     |           |            |       |         |    |            |            |          |                                 |                              |                                       |         |                            |  |  |  |  |     |           |            |       |         |    |            |            |
| Variable                   | Total sample<br>n (%)                                                                                                              | Men<br>n (%)                                                                                                                                                                                                                                            | Women<br>n (%)                                                                                                                                                                                                                                                                                                                                                                                                                                                                                                                                                                                                                                                                                                                                                                                                                                                                                                                                                                                                                                                                                                                                                                                                                                                                                                                                                                                                                                                                                                                                                                                                                                         |                     |                      |                     |          |                       |              |                |                           |                     |            |            |          |     |      |                  |                     |     |      |          |     |      |          |                                 |                              |                                       |         |                            |  |  |  |  |     |           |            |       |         |    |            |            |          |                                 |                              |                                       |         |                            |  |  |  |  |     |           |            |       |         |    |            |            |
| High emotional exhaustion  | 357 (67.1)                                                                                                                         | 209 (71.1)                                                                                                                                                                                                                                              | 148 (62.2)                                                                                                                                                                                                                                                                                                                                                                                                                                                                                                                                                                                                                                                                                                                                                                                                                                                                                                                                                                                                                                                                                                                                                                                                                                                                                                                                                                                                                                                                                                                                                                                                                                             |                     |                      |                     |          |                       |              |                |                           |                     |            |            |          |     |      |                  |                     |     |      |          |     |      |          |                                 |                              |                                       |         |                            |  |  |  |  |     |           |            |       |         |    |            |            |          |                                 |                              |                                       |         |                            |  |  |  |  |     |           |            |       |         |    |            |            |

| General              | Exposure                                                                                                                                                                                                              | Outcome                                                                                                                                                                                                                                                                  | Results                                                                                                                                                                                                                                                                                                                                                                                                                                                                                                                                                                                                                                                                                                                                                                                                                                                                                                                                                                                                                                                                                               |            |            |            |  |   |   |          |     |      |      |     |      |            |     |      |         |     |      |  |                          |         |                  |  |  |    |                 |  |     |                  |          |  |                          |         |                  |  |  |    |                 |  |     |                  |          |  |                          |         |
|----------------------|-----------------------------------------------------------------------------------------------------------------------------------------------------------------------------------------------------------------------|--------------------------------------------------------------------------------------------------------------------------------------------------------------------------------------------------------------------------------------------------------------------------|-------------------------------------------------------------------------------------------------------------------------------------------------------------------------------------------------------------------------------------------------------------------------------------------------------------------------------------------------------------------------------------------------------------------------------------------------------------------------------------------------------------------------------------------------------------------------------------------------------------------------------------------------------------------------------------------------------------------------------------------------------------------------------------------------------------------------------------------------------------------------------------------------------------------------------------------------------------------------------------------------------------------------------------------------------------------------------------------------------|------------|------------|------------|--|---|---|----------|-----|------|------|-----|------|------------|-----|------|---------|-----|------|--|--------------------------|---------|------------------|--|--|----|-----------------|--|-----|------------------|----------|--|--------------------------|---------|------------------|--|--|----|-----------------|--|-----|------------------|----------|--|--------------------------|---------|
|                      |                                                                                                                                                                                                                       |                                                                                                                                                                                                                                                                          | High depersonalization                                                                                                                                                                                                                                                                                                                                                                                                                                                                                                                                                                                                                                                                                                                                                                                                                                                                                                                                                                                                                                                                                | 252 (47.4) | 152 (51.7) | 100 (42.0) |  |   |   |          |     |      |      |     |      |            |     |      |         |     |      |  |                          |         |                  |  |  |    |                 |  |     |                  |          |  |                          |         |                  |  |  |    |                 |  |     |                  |          |  |                          |         |
|                      |                                                                                                                                                                                                                       |                                                                                                                                                                                                                                                                          | Decreased personal accomplishment                                                                                                                                                                                                                                                                                                                                                                                                                                                                                                                                                                                                                                                                                                                                                                                                                                                                                                                                                                                                                                                                     | 121 (22.7) | 58 (19.7)  | 63 (26.5)  |  |   |   |          |     |      |      |     |      |            |     |      |         |     |      |  |                          |         |                  |  |  |    |                 |  |     |                  |          |  |                          |         |                  |  |  |    |                 |  |     |                  |          |  |                          |         |
|                      |                                                                                                                                                                                                                       |                                                                                                                                                                                                                                                                          | <b>Association with stigmatization:</b><br><b>Correlation analysis (Spearman's rank-order correlation test)</b> <ul style="list-style-type: none"><li>- significant positive correlation was identified between emotional exhaustion (rs (530)=0.174; p≤0.001) and feeling stigmatised</li><li>- no statistically significant correlation between depersonalization and feeling stigmatized</li><li>- no statistically significant correlation between personal accomplishment and feeling stigmatized</li></ul>                                                                                                                                                                                                                                                                                                                                                                                                                                                                                                                                                                                      |            |            |            |  |   |   |          |     |      |      |     |      |            |     |      |         |     |      |  |                          |         |                  |  |  |    |                 |  |     |                  |          |  |                          |         |                  |  |  |    |                 |  |     |                  |          |  |                          |         |
| 7279 Greene 2020, UK | Being worried about rejection or stigmatization for being an NHS worker: single Likert scale ranging from 0 ("not at all") to 4 ("extremely")<br><br><b>Form of stigmatization:</b><br><u>Self-stigma (perceived)</u> | Distress: Having clinically significant PTDS, depression, and/or anxiety<br><br>PTDS: PTSD subscale of the International Trauma Questionnaire (ITQ)<br><br>Depression: Patient Health Questionnaire-9 (PHQ-9)<br><br>Anxiety: Generalized Anxiety Disorder Scale (GAD-7) | <b>Prevalence:</b><br><b>Tab: Prevalence of distress, PTSD, depression and anxiety</b> <table><tr><td></td><td>n</td><td>%</td></tr><tr><td>Distress</td><td>572</td><td>57.9</td></tr><tr><td>PTDS</td><td>246</td><td>22.5</td></tr><tr><td>Depression</td><td>477</td><td>46.9</td></tr><tr><td>Anxiety</td><td>470</td><td>47.3</td></tr></table><br><b>Association with stigmatization:</b><br><br><b>Table 3: Distress</b> <table><tr><td></td><td>Total sample OR (95% CI)</td><td>p-value</td></tr><tr><td>Perceived stigma</td><td></td><td></td></tr><tr><td>no</td><td>1.0 (Reference)</td><td></td></tr><tr><td>yes</td><td>1.25 (1.01-1.43)</td><td>&lt; 0.0005</td></tr></table><br><b>Table 3: PTDS</b> <table><tr><td></td><td>Total sample OR (95% CI)</td><td>p-value</td></tr><tr><td>Perceived stigma</td><td></td><td></td></tr><tr><td>no</td><td>1.0 (Reference)</td><td></td></tr><tr><td>yes</td><td>1.37 (1.20-1.58)</td><td>&lt; 0.0005</td></tr></table><br><b>Table 3: Depression</b> <table><tr><td></td><td>Total sample OR (95% CI)</td><td>p-value</td></tr></table> |            |            |            |  | n | % | Distress | 572 | 57.9 | PTDS | 246 | 22.5 | Depression | 477 | 46.9 | Anxiety | 470 | 47.3 |  | Total sample OR (95% CI) | p-value | Perceived stigma |  |  | no | 1.0 (Reference) |  | yes | 1.25 (1.01-1.43) | < 0.0005 |  | Total sample OR (95% CI) | p-value | Perceived stigma |  |  | no | 1.0 (Reference) |  | yes | 1.37 (1.20-1.58) | < 0.0005 |  | Total sample OR (95% CI) | p-value |
|                      | n                                                                                                                                                                                                                     | %                                                                                                                                                                                                                                                                        |                                                                                                                                                                                                                                                                                                                                                                                                                                                                                                                                                                                                                                                                                                                                                                                                                                                                                                                                                                                                                                                                                                       |            |            |            |  |   |   |          |     |      |      |     |      |            |     |      |         |     |      |  |                          |         |                  |  |  |    |                 |  |     |                  |          |  |                          |         |                  |  |  |    |                 |  |     |                  |          |  |                          |         |
| Distress             | 572                                                                                                                                                                                                                   | 57.9                                                                                                                                                                                                                                                                     |                                                                                                                                                                                                                                                                                                                                                                                                                                                                                                                                                                                                                                                                                                                                                                                                                                                                                                                                                                                                                                                                                                       |            |            |            |  |   |   |          |     |      |      |     |      |            |     |      |         |     |      |  |                          |         |                  |  |  |    |                 |  |     |                  |          |  |                          |         |                  |  |  |    |                 |  |     |                  |          |  |                          |         |
| PTDS                 | 246                                                                                                                                                                                                                   | 22.5                                                                                                                                                                                                                                                                     |                                                                                                                                                                                                                                                                                                                                                                                                                                                                                                                                                                                                                                                                                                                                                                                                                                                                                                                                                                                                                                                                                                       |            |            |            |  |   |   |          |     |      |      |     |      |            |     |      |         |     |      |  |                          |         |                  |  |  |    |                 |  |     |                  |          |  |                          |         |                  |  |  |    |                 |  |     |                  |          |  |                          |         |
| Depression           | 477                                                                                                                                                                                                                   | 46.9                                                                                                                                                                                                                                                                     |                                                                                                                                                                                                                                                                                                                                                                                                                                                                                                                                                                                                                                                                                                                                                                                                                                                                                                                                                                                                                                                                                                       |            |            |            |  |   |   |          |     |      |      |     |      |            |     |      |         |     |      |  |                          |         |                  |  |  |    |                 |  |     |                  |          |  |                          |         |                  |  |  |    |                 |  |     |                  |          |  |                          |         |
| Anxiety              | 470                                                                                                                                                                                                                   | 47.3                                                                                                                                                                                                                                                                     |                                                                                                                                                                                                                                                                                                                                                                                                                                                                                                                                                                                                                                                                                                                                                                                                                                                                                                                                                                                                                                                                                                       |            |            |            |  |   |   |          |     |      |      |     |      |            |     |      |         |     |      |  |                          |         |                  |  |  |    |                 |  |     |                  |          |  |                          |         |                  |  |  |    |                 |  |     |                  |          |  |                          |         |
|                      | Total sample OR (95% CI)                                                                                                                                                                                              | p-value                                                                                                                                                                                                                                                                  |                                                                                                                                                                                                                                                                                                                                                                                                                                                                                                                                                                                                                                                                                                                                                                                                                                                                                                                                                                                                                                                                                                       |            |            |            |  |   |   |          |     |      |      |     |      |            |     |      |         |     |      |  |                          |         |                  |  |  |    |                 |  |     |                  |          |  |                          |         |                  |  |  |    |                 |  |     |                  |          |  |                          |         |
| Perceived stigma     |                                                                                                                                                                                                                       |                                                                                                                                                                                                                                                                          |                                                                                                                                                                                                                                                                                                                                                                                                                                                                                                                                                                                                                                                                                                                                                                                                                                                                                                                                                                                                                                                                                                       |            |            |            |  |   |   |          |     |      |      |     |      |            |     |      |         |     |      |  |                          |         |                  |  |  |    |                 |  |     |                  |          |  |                          |         |                  |  |  |    |                 |  |     |                  |          |  |                          |         |
| no                   | 1.0 (Reference)                                                                                                                                                                                                       |                                                                                                                                                                                                                                                                          |                                                                                                                                                                                                                                                                                                                                                                                                                                                                                                                                                                                                                                                                                                                                                                                                                                                                                                                                                                                                                                                                                                       |            |            |            |  |   |   |          |     |      |      |     |      |            |     |      |         |     |      |  |                          |         |                  |  |  |    |                 |  |     |                  |          |  |                          |         |                  |  |  |    |                 |  |     |                  |          |  |                          |         |
| yes                  | 1.25 (1.01-1.43)                                                                                                                                                                                                      | < 0.0005                                                                                                                                                                                                                                                                 |                                                                                                                                                                                                                                                                                                                                                                                                                                                                                                                                                                                                                                                                                                                                                                                                                                                                                                                                                                                                                                                                                                       |            |            |            |  |   |   |          |     |      |      |     |      |            |     |      |         |     |      |  |                          |         |                  |  |  |    |                 |  |     |                  |          |  |                          |         |                  |  |  |    |                 |  |     |                  |          |  |                          |         |
|                      | Total sample OR (95% CI)                                                                                                                                                                                              | p-value                                                                                                                                                                                                                                                                  |                                                                                                                                                                                                                                                                                                                                                                                                                                                                                                                                                                                                                                                                                                                                                                                                                                                                                                                                                                                                                                                                                                       |            |            |            |  |   |   |          |     |      |      |     |      |            |     |      |         |     |      |  |                          |         |                  |  |  |    |                 |  |     |                  |          |  |                          |         |                  |  |  |    |                 |  |     |                  |          |  |                          |         |
| Perceived stigma     |                                                                                                                                                                                                                       |                                                                                                                                                                                                                                                                          |                                                                                                                                                                                                                                                                                                                                                                                                                                                                                                                                                                                                                                                                                                                                                                                                                                                                                                                                                                                                                                                                                                       |            |            |            |  |   |   |          |     |      |      |     |      |            |     |      |         |     |      |  |                          |         |                  |  |  |    |                 |  |     |                  |          |  |                          |         |                  |  |  |    |                 |  |     |                  |          |  |                          |         |
| no                   | 1.0 (Reference)                                                                                                                                                                                                       |                                                                                                                                                                                                                                                                          |                                                                                                                                                                                                                                                                                                                                                                                                                                                                                                                                                                                                                                                                                                                                                                                                                                                                                                                                                                                                                                                                                                       |            |            |            |  |   |   |          |     |      |      |     |      |            |     |      |         |     |      |  |                          |         |                  |  |  |    |                 |  |     |                  |          |  |                          |         |                  |  |  |    |                 |  |     |                  |          |  |                          |         |
| yes                  | 1.37 (1.20-1.58)                                                                                                                                                                                                      | < 0.0005                                                                                                                                                                                                                                                                 |                                                                                                                                                                                                                                                                                                                                                                                                                                                                                                                                                                                                                                                                                                                                                                                                                                                                                                                                                                                                                                                                                                       |            |            |            |  |   |   |          |     |      |      |     |      |            |     |      |         |     |      |  |                          |         |                  |  |  |    |                 |  |     |                  |          |  |                          |         |                  |  |  |    |                 |  |     |                  |          |  |                          |         |
|                      | Total sample OR (95% CI)                                                                                                                                                                                              | p-value                                                                                                                                                                                                                                                                  |                                                                                                                                                                                                                                                                                                                                                                                                                                                                                                                                                                                                                                                                                                                                                                                                                                                                                                                                                                                                                                                                                                       |            |            |            |  |   |   |          |     |      |      |     |      |            |     |      |         |     |      |  |                          |         |                  |  |  |    |                 |  |     |                  |          |  |                          |         |                  |  |  |    |                 |  |     |                  |          |  |                          |         |

| General              | Exposure                                                                                                                                                                                  | Outcome                                                                                                                                                                                                                                                                                                                                                                                                                                                                                                                                                                                                                                                                                                                                                               | Results                                                                                                                                                                                                                                |                                 |                |
|----------------------|-------------------------------------------------------------------------------------------------------------------------------------------------------------------------------------------|-----------------------------------------------------------------------------------------------------------------------------------------------------------------------------------------------------------------------------------------------------------------------------------------------------------------------------------------------------------------------------------------------------------------------------------------------------------------------------------------------------------------------------------------------------------------------------------------------------------------------------------------------------------------------------------------------------------------------------------------------------------------------|----------------------------------------------------------------------------------------------------------------------------------------------------------------------------------------------------------------------------------------|---------------------------------|----------------|
|                      |                                                                                                                                                                                           |                                                                                                                                                                                                                                                                                                                                                                                                                                                                                                                                                                                                                                                                                                                                                                       | Perceived stigma                                                                                                                                                                                                                       |                                 |                |
|                      |                                                                                                                                                                                           |                                                                                                                                                                                                                                                                                                                                                                                                                                                                                                                                                                                                                                                                                                                                                                       | no                                                                                                                                                                                                                                     | 1.0 (Reference)                 |                |
|                      |                                                                                                                                                                                           |                                                                                                                                                                                                                                                                                                                                                                                                                                                                                                                                                                                                                                                                                                                                                                       | yes                                                                                                                                                                                                                                    | 1.30 (1.15-1.48)                | < 0.0005       |
|                      |                                                                                                                                                                                           |                                                                                                                                                                                                                                                                                                                                                                                                                                                                                                                                                                                                                                                                                                                                                                       | <b>Table 3: Anxiety</b>                                                                                                                                                                                                                |                                 |                |
|                      |                                                                                                                                                                                           |                                                                                                                                                                                                                                                                                                                                                                                                                                                                                                                                                                                                                                                                                                                                                                       |                                                                                                                                                                                                                                        | <b>Total sample OR (95% CI)</b> | <b>p-value</b> |
|                      |                                                                                                                                                                                           |                                                                                                                                                                                                                                                                                                                                                                                                                                                                                                                                                                                                                                                                                                                                                                       | Perceived stigma                                                                                                                                                                                                                       |                                 |                |
|                      |                                                                                                                                                                                           |                                                                                                                                                                                                                                                                                                                                                                                                                                                                                                                                                                                                                                                                                                                                                                       | no                                                                                                                                                                                                                                     | 1.0 (Reference)                 |                |
|                      |                                                                                                                                                                                           |                                                                                                                                                                                                                                                                                                                                                                                                                                                                                                                                                                                                                                                                                                                                                                       | yes                                                                                                                                                                                                                                    | 1.23 (1.09-1.40)                | < 0.005        |
|                      |                                                                                                                                                                                           |                                                                                                                                                                                                                                                                                                                                                                                                                                                                                                                                                                                                                                                                                                                                                                       | *all adjusted for predictors: age, gender, ethnicity, annual household income, relationship, caring for children at home, work-related and COVID-19-related predictors                                                                 |                                 |                |
| 759 Juan 2020, China | Stigmatization and rejection in neighbourhood because of hospital work: 1 item question (yes, no)<br><br><b>Form of stigmatization:</b><br><u>Self-stigma (perceived): discrimination</u> | Psychological reactions: Impact of Event Scale-Revised (IES-R, normal: score 0–23, mild: score 24–32, moderate: score 33–36, severe: score >37)<br><br>Anxiety disorder: Generalized Anxiety Disorder 7 (GAD-7, normal: score 0–4, mild: score 5–9, moderate: score 10–14, severe: score 15–21)<br><br>Depression: Patient Health Questionnaire 9 (PHQ-9,normal: score 0–4, mild: score 5–9, moderate: score 10–14, severe: score 15–21)<br><br>Obsessive-compulsive symptoms: Yale-Brown Obsessive-Compulsive Scale (Y-BOCS, normal: score 0–5, mild: score 6–15, moderate: score 16–25, severe: score 26–40)<br><br>Somatization symptoms: Patient Health Questionnaire 15 (PHQ-15, normal: score 0–4, mild: score 5–9, moderate: score 10–14, severe: score 15–30) | <b>Prevalence:</b><br><br><b>Figure 1 and text: Prevalence of psychological distress, obsessive-compulsive symptoms, somatization symptoms, anxiety disorder, or depression among all participants (in %)</b>                          |                                 |                |
|                      |                                                                                                                                                                                           |                                                                                                                                                                                                                                                                                                                                                                                                                                                                                                                                                                                                                                                                                                                                                                       | <b>Outcome</b>                                                                                                                                                                                                                         | <b>%</b>                        |                |
|                      |                                                                                                                                                                                           |                                                                                                                                                                                                                                                                                                                                                                                                                                                                                                                                                                                                                                                                                                                                                                       | Psychological distress (obsessive-compulsive symptoms, somatization symptoms, anxiety disorder, or depression)                                                                                                                         | 43.2                            |                |
|                      |                                                                                                                                                                                           |                                                                                                                                                                                                                                                                                                                                                                                                                                                                                                                                                                                                                                                                                                                                                                       | Obsessive-compulsive symptoms                                                                                                                                                                                                          | 37.5                            |                |
|                      |                                                                                                                                                                                           |                                                                                                                                                                                                                                                                                                                                                                                                                                                                                                                                                                                                                                                                                                                                                                       | Somatization symptoms                                                                                                                                                                                                                  | 33.3                            |                |
|                      |                                                                                                                                                                                           |                                                                                                                                                                                                                                                                                                                                                                                                                                                                                                                                                                                                                                                                                                                                                                       | Anxiety disorder                                                                                                                                                                                                                       | 31.6                            |                |
|                      |                                                                                                                                                                                           |                                                                                                                                                                                                                                                                                                                                                                                                                                                                                                                                                                                                                                                                                                                                                                       | Depression                                                                                                                                                                                                                             | 29.6                            |                |
|                      |                                                                                                                                                                                           |                                                                                                                                                                                                                                                                                                                                                                                                                                                                                                                                                                                                                                                                                                                                                                       | n not reported                                                                                                                                                                                                                         |                                 |                |
|                      |                                                                                                                                                                                           |                                                                                                                                                                                                                                                                                                                                                                                                                                                                                                                                                                                                                                                                                                                                                                       | <b>Association with stigmatization:</b>                                                                                                                                                                                                |                                 |                |
|                      |                                                                                                                                                                                           |                                                                                                                                                                                                                                                                                                                                                                                                                                                                                                                                                                                                                                                                                                                                                                       | <b>Table 4: Multiple logistic regression analysis for the factor “stigmatization and rejection in neighbourhood because of hospital work?” associated with psychological distress related to the COVID-19 crisis (in AOR (95% CI))</b> |                                 |                |
|                      |                                                                                                                                                                                           |                                                                                                                                                                                                                                                                                                                                                                                                                                                                                                                                                                                                                                                                                                                                                                       | <b>Outcome</b>                                                                                                                                                                                                                         | <b>AOR (95% CI)</b>             |                |
|                      |                                                                                                                                                                                           |                                                                                                                                                                                                                                                                                                                                                                                                                                                                                                                                                                                                                                                                                                                                                                       | Psychological reaction                                                                                                                                                                                                                 | 1.705 (0.827–3.516)             |                |
|                      |                                                                                                                                                                                           |                                                                                                                                                                                                                                                                                                                                                                                                                                                                                                                                                                                                                                                                                                                                                                       | Anxiety symptoms                                                                                                                                                                                                                       | 1.329 (0.652–2.709)             |                |
|                      |                                                                                                                                                                                           |                                                                                                                                                                                                                                                                                                                                                                                                                                                                                                                                                                                                                                                                                                                                                                       | Depression symptoms                                                                                                                                                                                                                    | 2.297 (1.138–4.637)             |                |
|                      |                                                                                                                                                                                           |                                                                                                                                                                                                                                                                                                                                                                                                                                                                                                                                                                                                                                                                                                                                                                       | Obsessive-compulsive symptoms                                                                                                                                                                                                          | 1.842 (0.912–3.72)              |                |
|                      |                                                                                                                                                                                           |                                                                                                                                                                                                                                                                                                                                                                                                                                                                                                                                                                                                                                                                                                                                                                       | Somatization symptoms                                                                                                                                                                                                                  | 1.418(0.697–2.881)              |                |
|                      |                                                                                                                                                                                           |                                                                                                                                                                                                                                                                                                                                                                                                                                                                                                                                                                                                                                                                                                                                                                       | *use of AOR, but not details on adjustment                                                                                                                                                                                             |                                 |                |

| General                                                     | Exposure                                                                                                                                                                                           | Outcome                                                                                                                                                                                                                                                                                                                                                                  | Results                                                                                                                                                                                                                                                                                                                                                                                                                                                                                                                                                                                                                                                                                                                                                                                                                                                                                                                                                                                                                                                                                                                                                                                                                                                                                                                                                                                                                                                                                                                                                                                                                                                                                                                                                                                                                                                                                                                                                      |                         |             |                                                              |                                                                 |                                                             |             |            |             |          |           |            |        |            |            |            |          |           |          |                         |            |               |            |          |          |  |        |         |  |              |  |                       |                   |          |           |         |           |            |                  |                 |            |           |            |                  |                  |          |           |           |                  |                  |
|-------------------------------------------------------------|----------------------------------------------------------------------------------------------------------------------------------------------------------------------------------------------------|--------------------------------------------------------------------------------------------------------------------------------------------------------------------------------------------------------------------------------------------------------------------------------------------------------------------------------------------------------------------------|--------------------------------------------------------------------------------------------------------------------------------------------------------------------------------------------------------------------------------------------------------------------------------------------------------------------------------------------------------------------------------------------------------------------------------------------------------------------------------------------------------------------------------------------------------------------------------------------------------------------------------------------------------------------------------------------------------------------------------------------------------------------------------------------------------------------------------------------------------------------------------------------------------------------------------------------------------------------------------------------------------------------------------------------------------------------------------------------------------------------------------------------------------------------------------------------------------------------------------------------------------------------------------------------------------------------------------------------------------------------------------------------------------------------------------------------------------------------------------------------------------------------------------------------------------------------------------------------------------------------------------------------------------------------------------------------------------------------------------------------------------------------------------------------------------------------------------------------------------------------------------------------------------------------------------------------------------------|-------------------------|-------------|--------------------------------------------------------------|-----------------------------------------------------------------|-------------------------------------------------------------|-------------|------------|-------------|----------|-----------|------------|--------|------------|------------|------------|----------|-----------|----------|-------------------------|------------|---------------|------------|----------|----------|--|--------|---------|--|--------------|--|-----------------------|-------------------|----------|-----------|---------|-----------|------------|------------------|-----------------|------------|-----------|------------|------------------|------------------|----------|-----------|-----------|------------------|------------------|
| 749 Khanal 2020, Nepal                                      | <p>1 item: Stigma faced due to COVID-19 (yes, no, don't want to answer)</p> <p><b>Form of stigmatization:</b><br/><u>Self-stigma (perceived); discrimination, aggressive behaviour/mobbing</u></p> | <p>Anxiety and Depression: Hospital Anxiety and Depression Scale (HADS), 14-items, total scores: normal: 0–7, borderline abnormal: 8–10 and abnormal: 11–21</p> <p>Insomnia: Insomnia Severity Index (ISI), 7 items; no clinically significant insomnia (0–7), subthreshold insomnia (8–14), moderate clinical insomnia (15–21) and severe clinical insomnia (22–28)</p> | <p><b>Prevalence:</b><br/><b>Tab. Prevalence of anxiety, depression and insomnia</b></p> <table><tr><th>Mental Health Condition</th><th>Categories</th><th>Total n (%)</th></tr><tr><td rowspan="3">Anxiety</td><td>Normal</td><td>276 (58.1%)</td></tr><tr><td>Borderline</td><td>112 (23.6)</td></tr><tr><td>Abnormal</td><td>87 (18.3)</td></tr><tr><td rowspan="3">Depression</td><td>Normal</td><td>297 (62.5)</td></tr><tr><td>Borderline</td><td>114 (24.0)</td></tr><tr><td>Abnormal</td><td>64 (13.5)</td></tr><tr><td rowspan="3">Insomnia</td><td>No clinical significant</td><td>314 (66.1)</td></tr><tr><td>Sub threshold</td><td>127 (26.7)</td></tr><tr><td>Moderate</td><td>27 (5.7)</td></tr><tr><td></td><td>Severe</td><td>7 (1.5)</td></tr></table> <p>-&gt; Nurses have significantly higher scores (borderline, abnormal) in anxiety, depression and insomnia as compared to doctors and other health workers</p> <p><b>Association with Stigmatization:</b></p> <p><b>Tab.: Factors associated with anxiety, depression and insomnia (multivariate logistic regression)</b></p> <table><tr><th rowspan="2"></th><th colspan="2">Faced Stigma</th><th rowspan="2">Unadjusted OR (95%CI)</th><th rowspan="2">Adjusted OR (95%)</th></tr><tr><th>No n (%)</th><th>Yes n (%)</th></tr><tr><td>Anxiety</td><td>68 (34.2)</td><td>131 (65.8)</td><td>2.36 (1.62-3.44)</td><td>2.47(1.62-3.76)</td></tr><tr><td>Depression</td><td>57 (34.8)</td><td>116 (65.2)</td><td>2.13 (1.45–3.12)</td><td>2.05 (1.34–3.11)</td></tr><tr><td>Insomnia</td><td>37 (31.6)</td><td>80 (68.4)</td><td>2.26 (1.45–3.52)</td><td>2.37 (1.46–3.84)</td></tr></table> <p>*adjusted for gender, ethnicity, profession, education, living with elderly, family member with chronic disease, precautionary measures in the workplace, faced stigma, worked overtime, awareness about government incentive and history of medication for mental health problem</p> | Mental Health Condition | Categories  | Total n (%)                                                  | Anxiety                                                         | Normal                                                      | 276 (58.1%) | Borderline | 112 (23.6)  | Abnormal | 87 (18.3) | Depression | Normal | 297 (62.5) | Borderline | 114 (24.0) | Abnormal | 64 (13.5) | Insomnia | No clinical significant | 314 (66.1) | Sub threshold | 127 (26.7) | Moderate | 27 (5.7) |  | Severe | 7 (1.5) |  | Faced Stigma |  | Unadjusted OR (95%CI) | Adjusted OR (95%) | No n (%) | Yes n (%) | Anxiety | 68 (34.2) | 131 (65.8) | 2.36 (1.62-3.44) | 2.47(1.62-3.76) | Depression | 57 (34.8) | 116 (65.2) | 2.13 (1.45–3.12) | 2.05 (1.34–3.11) | Insomnia | 37 (31.6) | 80 (68.4) | 2.26 (1.45–3.52) | 2.37 (1.46–3.84) |
| Mental Health Condition                                     | Categories                                                                                                                                                                                         | Total n (%)                                                                                                                                                                                                                                                                                                                                                              |                                                                                                                                                                                                                                                                                                                                                                                                                                                                                                                                                                                                                                                                                                                                                                                                                                                                                                                                                                                                                                                                                                                                                                                                                                                                                                                                                                                                                                                                                                                                                                                                                                                                                                                                                                                                                                                                                                                                                              |                         |             |                                                              |                                                                 |                                                             |             |            |             |          |           |            |        |            |            |            |          |           |          |                         |            |               |            |          |          |  |        |         |  |              |  |                       |                   |          |           |         |           |            |                  |                 |            |           |            |                  |                  |          |           |           |                  |                  |
| Anxiety                                                     | Normal                                                                                                                                                                                             | 276 (58.1%)                                                                                                                                                                                                                                                                                                                                                              |                                                                                                                                                                                                                                                                                                                                                                                                                                                                                                                                                                                                                                                                                                                                                                                                                                                                                                                                                                                                                                                                                                                                                                                                                                                                                                                                                                                                                                                                                                                                                                                                                                                                                                                                                                                                                                                                                                                                                              |                         |             |                                                              |                                                                 |                                                             |             |            |             |          |           |            |        |            |            |            |          |           |          |                         |            |               |            |          |          |  |        |         |  |              |  |                       |                   |          |           |         |           |            |                  |                 |            |           |            |                  |                  |          |           |           |                  |                  |
|                                                             | Borderline                                                                                                                                                                                         | 112 (23.6)                                                                                                                                                                                                                                                                                                                                                               |                                                                                                                                                                                                                                                                                                                                                                                                                                                                                                                                                                                                                                                                                                                                                                                                                                                                                                                                                                                                                                                                                                                                                                                                                                                                                                                                                                                                                                                                                                                                                                                                                                                                                                                                                                                                                                                                                                                                                              |                         |             |                                                              |                                                                 |                                                             |             |            |             |          |           |            |        |            |            |            |          |           |          |                         |            |               |            |          |          |  |        |         |  |              |  |                       |                   |          |           |         |           |            |                  |                 |            |           |            |                  |                  |          |           |           |                  |                  |
|                                                             | Abnormal                                                                                                                                                                                           | 87 (18.3)                                                                                                                                                                                                                                                                                                                                                                |                                                                                                                                                                                                                                                                                                                                                                                                                                                                                                                                                                                                                                                                                                                                                                                                                                                                                                                                                                                                                                                                                                                                                                                                                                                                                                                                                                                                                                                                                                                                                                                                                                                                                                                                                                                                                                                                                                                                                              |                         |             |                                                              |                                                                 |                                                             |             |            |             |          |           |            |        |            |            |            |          |           |          |                         |            |               |            |          |          |  |        |         |  |              |  |                       |                   |          |           |         |           |            |                  |                 |            |           |            |                  |                  |          |           |           |                  |                  |
| Depression                                                  | Normal                                                                                                                                                                                             | 297 (62.5)                                                                                                                                                                                                                                                                                                                                                               |                                                                                                                                                                                                                                                                                                                                                                                                                                                                                                                                                                                                                                                                                                                                                                                                                                                                                                                                                                                                                                                                                                                                                                                                                                                                                                                                                                                                                                                                                                                                                                                                                                                                                                                                                                                                                                                                                                                                                              |                         |             |                                                              |                                                                 |                                                             |             |            |             |          |           |            |        |            |            |            |          |           |          |                         |            |               |            |          |          |  |        |         |  |              |  |                       |                   |          |           |         |           |            |                  |                 |            |           |            |                  |                  |          |           |           |                  |                  |
|                                                             | Borderline                                                                                                                                                                                         | 114 (24.0)                                                                                                                                                                                                                                                                                                                                                               |                                                                                                                                                                                                                                                                                                                                                                                                                                                                                                                                                                                                                                                                                                                                                                                                                                                                                                                                                                                                                                                                                                                                                                                                                                                                                                                                                                                                                                                                                                                                                                                                                                                                                                                                                                                                                                                                                                                                                              |                         |             |                                                              |                                                                 |                                                             |             |            |             |          |           |            |        |            |            |            |          |           |          |                         |            |               |            |          |          |  |        |         |  |              |  |                       |                   |          |           |         |           |            |                  |                 |            |           |            |                  |                  |          |           |           |                  |                  |
|                                                             | Abnormal                                                                                                                                                                                           | 64 (13.5)                                                                                                                                                                                                                                                                                                                                                                |                                                                                                                                                                                                                                                                                                                                                                                                                                                                                                                                                                                                                                                                                                                                                                                                                                                                                                                                                                                                                                                                                                                                                                                                                                                                                                                                                                                                                                                                                                                                                                                                                                                                                                                                                                                                                                                                                                                                                              |                         |             |                                                              |                                                                 |                                                             |             |            |             |          |           |            |        |            |            |            |          |           |          |                         |            |               |            |          |          |  |        |         |  |              |  |                       |                   |          |           |         |           |            |                  |                 |            |           |            |                  |                  |          |           |           |                  |                  |
| Insomnia                                                    | No clinical significant                                                                                                                                                                            | 314 (66.1)                                                                                                                                                                                                                                                                                                                                                               |                                                                                                                                                                                                                                                                                                                                                                                                                                                                                                                                                                                                                                                                                                                                                                                                                                                                                                                                                                                                                                                                                                                                                                                                                                                                                                                                                                                                                                                                                                                                                                                                                                                                                                                                                                                                                                                                                                                                                              |                         |             |                                                              |                                                                 |                                                             |             |            |             |          |           |            |        |            |            |            |          |           |          |                         |            |               |            |          |          |  |        |         |  |              |  |                       |                   |          |           |         |           |            |                  |                 |            |           |            |                  |                  |          |           |           |                  |                  |
|                                                             | Sub threshold                                                                                                                                                                                      | 127 (26.7)                                                                                                                                                                                                                                                                                                                                                               |                                                                                                                                                                                                                                                                                                                                                                                                                                                                                                                                                                                                                                                                                                                                                                                                                                                                                                                                                                                                                                                                                                                                                                                                                                                                                                                                                                                                                                                                                                                                                                                                                                                                                                                                                                                                                                                                                                                                                              |                         |             |                                                              |                                                                 |                                                             |             |            |             |          |           |            |        |            |            |            |          |           |          |                         |            |               |            |          |          |  |        |         |  |              |  |                       |                   |          |           |         |           |            |                  |                 |            |           |            |                  |                  |          |           |           |                  |                  |
|                                                             | Moderate                                                                                                                                                                                           | 27 (5.7)                                                                                                                                                                                                                                                                                                                                                                 |                                                                                                                                                                                                                                                                                                                                                                                                                                                                                                                                                                                                                                                                                                                                                                                                                                                                                                                                                                                                                                                                                                                                                                                                                                                                                                                                                                                                                                                                                                                                                                                                                                                                                                                                                                                                                                                                                                                                                              |                         |             |                                                              |                                                                 |                                                             |             |            |             |          |           |            |        |            |            |            |          |           |          |                         |            |               |            |          |          |  |        |         |  |              |  |                       |                   |          |           |         |           |            |                  |                 |            |           |            |                  |                  |          |           |           |                  |                  |
|                                                             | Severe                                                                                                                                                                                             | 7 (1.5)                                                                                                                                                                                                                                                                                                                                                                  |                                                                                                                                                                                                                                                                                                                                                                                                                                                                                                                                                                                                                                                                                                                                                                                                                                                                                                                                                                                                                                                                                                                                                                                                                                                                                                                                                                                                                                                                                                                                                                                                                                                                                                                                                                                                                                                                                                                                                              |                         |             |                                                              |                                                                 |                                                             |             |            |             |          |           |            |        |            |            |            |          |           |          |                         |            |               |            |          |          |  |        |         |  |              |  |                       |                   |          |           |         |           |            |                  |                 |            |           |            |                  |                  |          |           |           |                  |                  |
|                                                             | Faced Stigma                                                                                                                                                                                       |                                                                                                                                                                                                                                                                                                                                                                          | Unadjusted OR (95%CI)                                                                                                                                                                                                                                                                                                                                                                                                                                                                                                                                                                                                                                                                                                                                                                                                                                                                                                                                                                                                                                                                                                                                                                                                                                                                                                                                                                                                                                                                                                                                                                                                                                                                                                                                                                                                                                                                                                                                        | Adjusted OR (95%)       |             |                                                              |                                                                 |                                                             |             |            |             |          |           |            |        |            |            |            |          |           |          |                         |            |               |            |          |          |  |        |         |  |              |  |                       |                   |          |           |         |           |            |                  |                 |            |           |            |                  |                  |          |           |           |                  |                  |
|                                                             | No n (%)                                                                                                                                                                                           | Yes n (%)                                                                                                                                                                                                                                                                                                                                                                |                                                                                                                                                                                                                                                                                                                                                                                                                                                                                                                                                                                                                                                                                                                                                                                                                                                                                                                                                                                                                                                                                                                                                                                                                                                                                                                                                                                                                                                                                                                                                                                                                                                                                                                                                                                                                                                                                                                                                              |                         |             |                                                              |                                                                 |                                                             |             |            |             |          |           |            |        |            |            |            |          |           |          |                         |            |               |            |          |          |  |        |         |  |              |  |                       |                   |          |           |         |           |            |                  |                 |            |           |            |                  |                  |          |           |           |                  |                  |
| Anxiety                                                     | 68 (34.2)                                                                                                                                                                                          | 131 (65.8)                                                                                                                                                                                                                                                                                                                                                               | 2.36 (1.62-3.44)                                                                                                                                                                                                                                                                                                                                                                                                                                                                                                                                                                                                                                                                                                                                                                                                                                                                                                                                                                                                                                                                                                                                                                                                                                                                                                                                                                                                                                                                                                                                                                                                                                                                                                                                                                                                                                                                                                                                             | 2.47(1.62-3.76)         |             |                                                              |                                                                 |                                                             |             |            |             |          |           |            |        |            |            |            |          |           |          |                         |            |               |            |          |          |  |        |         |  |              |  |                       |                   |          |           |         |           |            |                  |                 |            |           |            |                  |                  |          |           |           |                  |                  |
| Depression                                                  | 57 (34.8)                                                                                                                                                                                          | 116 (65.2)                                                                                                                                                                                                                                                                                                                                                               | 2.13 (1.45–3.12)                                                                                                                                                                                                                                                                                                                                                                                                                                                                                                                                                                                                                                                                                                                                                                                                                                                                                                                                                                                                                                                                                                                                                                                                                                                                                                                                                                                                                                                                                                                                                                                                                                                                                                                                                                                                                                                                                                                                             | 2.05 (1.34–3.11)        |             |                                                              |                                                                 |                                                             |             |            |             |          |           |            |        |            |            |            |          |           |          |                         |            |               |            |          |          |  |        |         |  |              |  |                       |                   |          |           |         |           |            |                  |                 |            |           |            |                  |                  |          |           |           |                  |                  |
| Insomnia                                                    | 37 (31.6)                                                                                                                                                                                          | 80 (68.4)                                                                                                                                                                                                                                                                                                                                                                | 2.26 (1.45–3.52)                                                                                                                                                                                                                                                                                                                                                                                                                                                                                                                                                                                                                                                                                                                                                                                                                                                                                                                                                                                                                                                                                                                                                                                                                                                                                                                                                                                                                                                                                                                                                                                                                                                                                                                                                                                                                                                                                                                                             | 2.37 (1.46–3.84)        |             |                                                              |                                                                 |                                                             |             |            |             |          |           |            |        |            |            |            |          |           |          |                         |            |               |            |          |          |  |        |         |  |              |  |                       |                   |          |           |         |           |            |                  |                 |            |           |            |                  |                  |          |           |           |                  |                  |
| 948 Monterrosa-Castro, 2020, Colombia                       | <p>Social discrimination for working as a general practitioner (questions not described)</p> <p><b>Forms of stigmatization:</b><br/><u>Self-Stigma (perceived); discrimination</u></p>             | <p>Generalized Anxiety Disorder (GAD): Generalized Anxiety Disorder Scale (GAD-7), 7 Items, total score of 0–21, ≥ 10 indicates GAD symptoms</p>                                                                                                                                                                                                                         | <p><b>Prevalence:</b><br/><b>Tab. Prevalence of GAD</b></p> <table><tr><th>Variable</th><th>Total (n/%)</th><th>With symptoms of generalized anxiety disorder, n=209 (39.3%)</th><th>Without symptoms of generalized anxiety disorder, n=322 (60.6%)</th></tr><tr><td>Social discrimination for working as a general practitioner</td><td>207 (38.9)</td><td>106 (50.7)</td><td>101 (31.3))</td></tr></table>                                                                                                                                                                                                                                                                                                                                                                                                                                                                                                                                                                                                                                                                                                                                                                                                                                                                                                                                                                                                                                                                                                                                                                                                                                                                                                                                                                                                                                                                                                                                                | Variable                | Total (n/%) | With symptoms of generalized anxiety disorder, n=209 (39.3%) | Without symptoms of generalized anxiety disorder, n=322 (60.6%) | Social discrimination for working as a general practitioner | 207 (38.9)  | 106 (50.7) | 101 (31.3)) |          |           |            |        |            |            |            |          |           |          |                         |            |               |            |          |          |  |        |         |  |              |  |                       |                   |          |           |         |           |            |                  |                 |            |           |            |                  |                  |          |           |           |                  |                  |
| Variable                                                    | Total (n/%)                                                                                                                                                                                        | With symptoms of generalized anxiety disorder, n=209 (39.3%)                                                                                                                                                                                                                                                                                                             | Without symptoms of generalized anxiety disorder, n=322 (60.6%)                                                                                                                                                                                                                                                                                                                                                                                                                                                                                                                                                                                                                                                                                                                                                                                                                                                                                                                                                                                                                                                                                                                                                                                                                                                                                                                                                                                                                                                                                                                                                                                                                                                                                                                                                                                                                                                                                              |                         |             |                                                              |                                                                 |                                                             |             |            |             |          |           |            |        |            |            |            |          |           |          |                         |            |               |            |          |          |  |        |         |  |              |  |                       |                   |          |           |         |           |            |                  |                 |            |           |            |                  |                  |          |           |           |                  |                  |
| Social discrimination for working as a general practitioner | 207 (38.9)                                                                                                                                                                                         | 106 (50.7)                                                                                                                                                                                                                                                                                                                                                               | 101 (31.3))                                                                                                                                                                                                                                                                                                                                                                                                                                                                                                                                                                                                                                                                                                                                                                                                                                                                                                                                                                                                                                                                                                                                                                                                                                                                                                                                                                                                                                                                                                                                                                                                                                                                                                                                                                                                                                                                                                                                                  |                         |             |                                                              |                                                                 |                                                             |             |            |             |          |           |            |        |            |            |            |          |           |          |                         |            |               |            |          |          |  |        |         |  |              |  |                       |                   |          |           |         |           |            |                  |                 |            |           |            |                  |                  |          |           |           |                  |                  |

| General                                                     | Exposure                                                                                                                                                                                                                                                                                                                                      | Outcome                                                                                                                                                                     | Results                                                                                                                                                                                                                                                                                                                                                                                                                                                                                                                                                                                                                                                                                                                                                                                                                                                                                                                                                                                                                                                                                                                                                                                                                                                                                                                                                                                                                |                          |                              |                                   |                           |           |                   |                                                             |                     |         |               |             |             |        |                              |                                   |                           |                  |       |        |       |                    |       |        |       |        |                                            |  |                                           |  |  |      |   |      |   |                    |       |      |       |      |                         |        |       |        |       |                 |       |      |       |      |
|-------------------------------------------------------------|-----------------------------------------------------------------------------------------------------------------------------------------------------------------------------------------------------------------------------------------------------------------------------------------------------------------------------------------------|-----------------------------------------------------------------------------------------------------------------------------------------------------------------------------|------------------------------------------------------------------------------------------------------------------------------------------------------------------------------------------------------------------------------------------------------------------------------------------------------------------------------------------------------------------------------------------------------------------------------------------------------------------------------------------------------------------------------------------------------------------------------------------------------------------------------------------------------------------------------------------------------------------------------------------------------------------------------------------------------------------------------------------------------------------------------------------------------------------------------------------------------------------------------------------------------------------------------------------------------------------------------------------------------------------------------------------------------------------------------------------------------------------------------------------------------------------------------------------------------------------------------------------------------------------------------------------------------------------------|--------------------------|------------------------------|-----------------------------------|---------------------------|-----------|-------------------|-------------------------------------------------------------|---------------------|---------|---------------|-------------|-------------|--------|------------------------------|-----------------------------------|---------------------------|------------------|-------|--------|-------|--------------------|-------|--------|-------|--------|--------------------------------------------|--|-------------------------------------------|--|--|------|---|------|---|--------------------|-------|------|-------|------|-------------------------|--------|-------|--------|-------|-----------------|-------|------|-------|------|
|                                                             |                                                                                                                                                                                                                                                                                                                                               |                                                                                                                                                                             | <table><tr><td></td><td></td><td>(chi<sup>2</sup>) p</td><td>&lt;0.001</td></tr></table> <p>Association with stigmatization:</p> <p>Tab.: Psychosocial and demographic factors associated with symptoms of generalized anxiety disorder, not adjusted logistic regression (N=531)</p> <table><tr><td>Variables</td><td>crude OR (95% CI)</td></tr><tr><td>Social discrimination for working as a general practitioner</td><td>2.25 (1.57 to 3.22)</td></tr></table>                                                                                                                                                                                                                                                                                                                                                                                                                                                                                                                                                                                                                                                                                                                                                                                                                                                                                                                                                    |                          |                              | (chi <sup>2</sup> ) p             | <0.001                    | Variables | crude OR (95% CI) | Social discrimination for working as a general practitioner | 2.25 (1.57 to 3.22) |         |               |             |             |        |                              |                                   |                           |                  |       |        |       |                    |       |        |       |        |                                            |  |                                           |  |  |      |   |      |   |                    |       |      |       |      |                         |        |       |        |       |                 |       |      |       |      |
|                                                             |                                                                                                                                                                                                                                                                                                                                               | (chi <sup>2</sup> ) p                                                                                                                                                       | <0.001                                                                                                                                                                                                                                                                                                                                                                                                                                                                                                                                                                                                                                                                                                                                                                                                                                                                                                                                                                                                                                                                                                                                                                                                                                                                                                                                                                                                                 |                          |                              |                                   |                           |           |                   |                                                             |                     |         |               |             |             |        |                              |                                   |                           |                  |       |        |       |                    |       |        |       |        |                                            |  |                                           |  |  |      |   |      |   |                    |       |      |       |      |                         |        |       |        |       |                 |       |      |       |      |
| Variables                                                   | crude OR (95% CI)                                                                                                                                                                                                                                                                                                                             |                                                                                                                                                                             |                                                                                                                                                                                                                                                                                                                                                                                                                                                                                                                                                                                                                                                                                                                                                                                                                                                                                                                                                                                                                                                                                                                                                                                                                                                                                                                                                                                                                        |                          |                              |                                   |                           |           |                   |                                                             |                     |         |               |             |             |        |                              |                                   |                           |                  |       |        |       |                    |       |        |       |        |                                            |  |                                           |  |  |      |   |      |   |                    |       |      |       |      |                         |        |       |        |       |                 |       |      |       |      |
| Social discrimination for working as a general practitioner | 2.25 (1.57 to 3.22)                                                                                                                                                                                                                                                                                                                           |                                                                                                                                                                             |                                                                                                                                                                                                                                                                                                                                                                                                                                                                                                                                                                                                                                                                                                                                                                                                                                                                                                                                                                                                                                                                                                                                                                                                                                                                                                                                                                                                                        |                          |                              |                                   |                           |           |                   |                                                             |                     |         |               |             |             |        |                              |                                   |                           |                  |       |        |       |                    |       |        |       |        |                                            |  |                                           |  |  |      |   |      |   |                    |       |      |       |      |                         |        |       |        |       |                 |       |      |       |      |
| 7261<br>Ramaci,<br>Italy, 2020                              | <p>“Stigma discrimination”<br/>“Stigma fear”: no description of definition included; adapted from See et al. 2011 (answer options: 0 = strongly disagree, 1 = disagree, 2 = agree, 3 = strongly agree)</p> <p><b>Form of stigmatization:</b><br/><u>Self-stigma (perceived): discrimination</u><br/><br/><u>Self-stigma (anticipated)</u></p> | Professional Quality of Life Scale (ProQOL): 3 dimensions: compassion fatigue (7 items), compassion satisfaction (8 items), risk of burnout (7 items); 5-point Likert scale | <p><b>Prevalence:</b><br/><b>Tab: Prevalence of compassion fatigue, satisfaction and risk of burnout with regard to sex</b></p> <table><tr><td>Sex</td><td>Compassion fatigue Mean (SD)</td><td>Compassion satisfaction Mean (SD)</td><td>Risk of burnout Mean (SD)</td></tr><tr><td>Males</td><td>2.12 (1.3)</td><td>3.81 (1.0)</td><td>1.62 (1.0)</td></tr><tr><td>Females</td><td>2.52 (SD 1.2)</td><td>3.56 (0.97)</td><td>2.02 (0.99)</td></tr></table> <p><b>Tab.: Association with stigmatization (zero-order correlation):</b></p> <table><tr><td>Stigma</td><td>Compassion fatigue Mean (SD)</td><td>Compassion satisfaction Mean (SD)</td><td>Risk of burnout Mean (SD)</td></tr><tr><td>Perceived stigma</td><td>0.307</td><td>-0.263</td><td>0.348</td></tr><tr><td>Anticipated stigma</td><td>0.341</td><td>-0.173</td><td>0.226</td></tr></table> <p><b>Multiple regression</b></p> <table><tr><td>Stigma</td><td colspan="2">Perceived stigma (<i>discrimination</i>)</td><td colspan="2">Anticipated stigma (<i>Stigma fear</i>)</td></tr><tr><td></td><td>Beta</td><td>t</td><td>Beta</td><td>T</td></tr><tr><td>Compassion fatigue</td><td>0.348</td><td>4.50</td><td>0.291</td><td>5.41</td></tr><tr><td>Compassion satisfaction</td><td>-0.231</td><td>-3.73</td><td>-0.141</td><td>-2.54</td></tr><tr><td>Risk of burnout</td><td>0.317</td><td>5.54</td><td>0.171</td><td>3.08</td></tr></table> | Sex                      | Compassion fatigue Mean (SD) | Compassion satisfaction Mean (SD) | Risk of burnout Mean (SD) | Males     | 2.12 (1.3)        | 3.81 (1.0)                                                  | 1.62 (1.0)          | Females | 2.52 (SD 1.2) | 3.56 (0.97) | 2.02 (0.99) | Stigma | Compassion fatigue Mean (SD) | Compassion satisfaction Mean (SD) | Risk of burnout Mean (SD) | Perceived stigma | 0.307 | -0.263 | 0.348 | Anticipated stigma | 0.341 | -0.173 | 0.226 | Stigma | Perceived stigma ( <i>discrimination</i> ) |  | Anticipated stigma ( <i>Stigma fear</i> ) |  |  | Beta | t | Beta | T | Compassion fatigue | 0.348 | 4.50 | 0.291 | 5.41 | Compassion satisfaction | -0.231 | -3.73 | -0.141 | -2.54 | Risk of burnout | 0.317 | 5.54 | 0.171 | 3.08 |
| Sex                                                         | Compassion fatigue Mean (SD)                                                                                                                                                                                                                                                                                                                  | Compassion satisfaction Mean (SD)                                                                                                                                           | Risk of burnout Mean (SD)                                                                                                                                                                                                                                                                                                                                                                                                                                                                                                                                                                                                                                                                                                                                                                                                                                                                                                                                                                                                                                                                                                                                                                                                                                                                                                                                                                                              |                          |                              |                                   |                           |           |                   |                                                             |                     |         |               |             |             |        |                              |                                   |                           |                  |       |        |       |                    |       |        |       |        |                                            |  |                                           |  |  |      |   |      |   |                    |       |      |       |      |                         |        |       |        |       |                 |       |      |       |      |
| Males                                                       | 2.12 (1.3)                                                                                                                                                                                                                                                                                                                                    | 3.81 (1.0)                                                                                                                                                                  | 1.62 (1.0)                                                                                                                                                                                                                                                                                                                                                                                                                                                                                                                                                                                                                                                                                                                                                                                                                                                                                                                                                                                                                                                                                                                                                                                                                                                                                                                                                                                                             |                          |                              |                                   |                           |           |                   |                                                             |                     |         |               |             |             |        |                              |                                   |                           |                  |       |        |       |                    |       |        |       |        |                                            |  |                                           |  |  |      |   |      |   |                    |       |      |       |      |                         |        |       |        |       |                 |       |      |       |      |
| Females                                                     | 2.52 (SD 1.2)                                                                                                                                                                                                                                                                                                                                 | 3.56 (0.97)                                                                                                                                                                 | 2.02 (0.99)                                                                                                                                                                                                                                                                                                                                                                                                                                                                                                                                                                                                                                                                                                                                                                                                                                                                                                                                                                                                                                                                                                                                                                                                                                                                                                                                                                                                            |                          |                              |                                   |                           |           |                   |                                                             |                     |         |               |             |             |        |                              |                                   |                           |                  |       |        |       |                    |       |        |       |        |                                            |  |                                           |  |  |      |   |      |   |                    |       |      |       |      |                         |        |       |        |       |                 |       |      |       |      |
| Stigma                                                      | Compassion fatigue Mean (SD)                                                                                                                                                                                                                                                                                                                  | Compassion satisfaction Mean (SD)                                                                                                                                           | Risk of burnout Mean (SD)                                                                                                                                                                                                                                                                                                                                                                                                                                                                                                                                                                                                                                                                                                                                                                                                                                                                                                                                                                                                                                                                                                                                                                                                                                                                                                                                                                                              |                          |                              |                                   |                           |           |                   |                                                             |                     |         |               |             |             |        |                              |                                   |                           |                  |       |        |       |                    |       |        |       |        |                                            |  |                                           |  |  |      |   |      |   |                    |       |      |       |      |                         |        |       |        |       |                 |       |      |       |      |
| Perceived stigma                                            | 0.307                                                                                                                                                                                                                                                                                                                                         | -0.263                                                                                                                                                                      | 0.348                                                                                                                                                                                                                                                                                                                                                                                                                                                                                                                                                                                                                                                                                                                                                                                                                                                                                                                                                                                                                                                                                                                                                                                                                                                                                                                                                                                                                  |                          |                              |                                   |                           |           |                   |                                                             |                     |         |               |             |             |        |                              |                                   |                           |                  |       |        |       |                    |       |        |       |        |                                            |  |                                           |  |  |      |   |      |   |                    |       |      |       |      |                         |        |       |        |       |                 |       |      |       |      |
| Anticipated stigma                                          | 0.341                                                                                                                                                                                                                                                                                                                                         | -0.173                                                                                                                                                                      | 0.226                                                                                                                                                                                                                                                                                                                                                                                                                                                                                                                                                                                                                                                                                                                                                                                                                                                                                                                                                                                                                                                                                                                                                                                                                                                                                                                                                                                                                  |                          |                              |                                   |                           |           |                   |                                                             |                     |         |               |             |             |        |                              |                                   |                           |                  |       |        |       |                    |       |        |       |        |                                            |  |                                           |  |  |      |   |      |   |                    |       |      |       |      |                         |        |       |        |       |                 |       |      |       |      |
| Stigma                                                      | Perceived stigma ( <i>discrimination</i> )                                                                                                                                                                                                                                                                                                    |                                                                                                                                                                             | Anticipated stigma ( <i>Stigma fear</i> )                                                                                                                                                                                                                                                                                                                                                                                                                                                                                                                                                                                                                                                                                                                                                                                                                                                                                                                                                                                                                                                                                                                                                                                                                                                                                                                                                                              |                          |                              |                                   |                           |           |                   |                                                             |                     |         |               |             |             |        |                              |                                   |                           |                  |       |        |       |                    |       |        |       |        |                                            |  |                                           |  |  |      |   |      |   |                    |       |      |       |      |                         |        |       |        |       |                 |       |      |       |      |
|                                                             | Beta                                                                                                                                                                                                                                                                                                                                          | t                                                                                                                                                                           | Beta                                                                                                                                                                                                                                                                                                                                                                                                                                                                                                                                                                                                                                                                                                                                                                                                                                                                                                                                                                                                                                                                                                                                                                                                                                                                                                                                                                                                                   | T                        |                              |                                   |                           |           |                   |                                                             |                     |         |               |             |             |        |                              |                                   |                           |                  |       |        |       |                    |       |        |       |        |                                            |  |                                           |  |  |      |   |      |   |                    |       |      |       |      |                         |        |       |        |       |                 |       |      |       |      |
| Compassion fatigue                                          | 0.348                                                                                                                                                                                                                                                                                                                                         | 4.50                                                                                                                                                                        | 0.291                                                                                                                                                                                                                                                                                                                                                                                                                                                                                                                                                                                                                                                                                                                                                                                                                                                                                                                                                                                                                                                                                                                                                                                                                                                                                                                                                                                                                  | 5.41                     |                              |                                   |                           |           |                   |                                                             |                     |         |               |             |             |        |                              |                                   |                           |                  |       |        |       |                    |       |        |       |        |                                            |  |                                           |  |  |      |   |      |   |                    |       |      |       |      |                         |        |       |        |       |                 |       |      |       |      |
| Compassion satisfaction                                     | -0.231                                                                                                                                                                                                                                                                                                                                        | -3.73                                                                                                                                                                       | -0.141                                                                                                                                                                                                                                                                                                                                                                                                                                                                                                                                                                                                                                                                                                                                                                                                                                                                                                                                                                                                                                                                                                                                                                                                                                                                                                                                                                                                                 | -2.54                    |                              |                                   |                           |           |                   |                                                             |                     |         |               |             |             |        |                              |                                   |                           |                  |       |        |       |                    |       |        |       |        |                                            |  |                                           |  |  |      |   |      |   |                    |       |      |       |      |                         |        |       |        |       |                 |       |      |       |      |
| Risk of burnout                                             | 0.317                                                                                                                                                                                                                                                                                                                                         | 5.54                                                                                                                                                                        | 0.171                                                                                                                                                                                                                                                                                                                                                                                                                                                                                                                                                                                                                                                                                                                                                                                                                                                                                                                                                                                                                                                                                                                                                                                                                                                                                                                                                                                                                  | 3.08                     |                              |                                   |                           |           |                   |                                                             |                     |         |               |             |             |        |                              |                                   |                           |                  |       |        |       |                    |       |        |       |        |                                            |  |                                           |  |  |      |   |      |   |                    |       |      |       |      |                         |        |       |        |       |                 |       |      |       |      |
| 832 Sharma<br>2020,<br>USA                                  | <p>Stigma from community: instrument not reported</p> <p><b>Form of stigmatization:</b><br/><u>Self-stigma (perceived)</u></p>                                                                                                                                                                                                                | Emotional distress/burnout (dichotomous variable): instrument not reported                                                                                                  | <p><b>Prevalence:</b></p> <p><b>Figure 2 and Table 2: Emotional distress/Burnout</b></p> <table><tr><td>Health care professional</td><td>%</td></tr><tr><td>Total sample</td><td>58</td></tr><tr><td>Doctor</td><td>49</td></tr></table>                                                                                                                                                                                                                                                                                                                                                                                                                                                                                                                                                                                                                                                                                                                                                                                                                                                                                                                                                                                                                                                                                                                                                                               | Health care professional | %                            | Total sample                      | 58                        | Doctor    | 49                |                                                             |                     |         |               |             |             |        |                              |                                   |                           |                  |       |        |       |                    |       |        |       |        |                                            |  |                                           |  |  |      |   |      |   |                    |       |      |       |      |                         |        |       |        |       |                 |       |      |       |      |
| Health care professional                                    | %                                                                                                                                                                                                                                                                                                                                             |                                                                                                                                                                             |                                                                                                                                                                                                                                                                                                                                                                                                                                                                                                                                                                                                                                                                                                                                                                                                                                                                                                                                                                                                                                                                                                                                                                                                                                                                                                                                                                                                                        |                          |                              |                                   |                           |           |                   |                                                             |                     |         |               |             |             |        |                              |                                   |                           |                  |       |        |       |                    |       |        |       |        |                                            |  |                                           |  |  |      |   |      |   |                    |       |      |       |      |                         |        |       |        |       |                 |       |      |       |      |
| Total sample                                                | 58                                                                                                                                                                                                                                                                                                                                            |                                                                                                                                                                             |                                                                                                                                                                                                                                                                                                                                                                                                                                                                                                                                                                                                                                                                                                                                                                                                                                                                                                                                                                                                                                                                                                                                                                                                                                                                                                                                                                                                                        |                          |                              |                                   |                           |           |                   |                                                             |                     |         |               |             |             |        |                              |                                   |                           |                  |       |        |       |                    |       |        |       |        |                                            |  |                                           |  |  |      |   |      |   |                    |       |      |       |      |                         |        |       |        |       |                 |       |      |       |      |
| Doctor                                                      | 49                                                                                                                                                                                                                                                                                                                                            |                                                                                                                                                                             |                                                                                                                                                                                                                                                                                                                                                                                                                                                                                                                                                                                                                                                                                                                                                                                                                                                                                                                                                                                                                                                                                                                                                                                                                                                                                                                                                                                                                        |                          |                              |                                   |                           |           |                   |                                                             |                     |         |               |             |             |        |                              |                                   |                           |                  |       |        |       |                    |       |        |       |        |                                            |  |                                           |  |  |      |   |      |   |                    |       |      |       |      |                         |        |       |        |       |                 |       |      |       |      |

| General                                                        | Exposure                                                                                                                                                                                                                                                                                                | Outcome                                                                                                                                                                                                                                                                                                       | Results                                                                                                                                                                                                                                                                                                                                                                                                                                                                                                                                                                                                                                                                                                                                                                                                                                                                                                                                                                                                                                                                                                                                                                                                                                                                                                                                                                                                                                                                                                                                                                                                                                                                                                                                                   |                          |    |                                                      |      |                                                |      |                                              |      |                                         |             |                                                           |                  |  |          |          |                                                           |     |     |                                                     |     |      |                                                   |     |      |                                              |     |     |                                                                |     |      |                                           |     |     |                                         |     |     |                             |      |     |                                |     |     |
|----------------------------------------------------------------|---------------------------------------------------------------------------------------------------------------------------------------------------------------------------------------------------------------------------------------------------------------------------------------------------------|---------------------------------------------------------------------------------------------------------------------------------------------------------------------------------------------------------------------------------------------------------------------------------------------------------------|-----------------------------------------------------------------------------------------------------------------------------------------------------------------------------------------------------------------------------------------------------------------------------------------------------------------------------------------------------------------------------------------------------------------------------------------------------------------------------------------------------------------------------------------------------------------------------------------------------------------------------------------------------------------------------------------------------------------------------------------------------------------------------------------------------------------------------------------------------------------------------------------------------------------------------------------------------------------------------------------------------------------------------------------------------------------------------------------------------------------------------------------------------------------------------------------------------------------------------------------------------------------------------------------------------------------------------------------------------------------------------------------------------------------------------------------------------------------------------------------------------------------------------------------------------------------------------------------------------------------------------------------------------------------------------------------------------------------------------------------------------------|--------------------------|----|------------------------------------------------------|------|------------------------------------------------|------|----------------------------------------------|------|-----------------------------------------|-------------|-----------------------------------------------------------|------------------|--|----------|----------|-----------------------------------------------------------|-----|-----|-----------------------------------------------------|-----|------|---------------------------------------------------|-----|------|----------------------------------------------|-----|-----|----------------------------------------------------------------|-----|------|-------------------------------------------|-----|-----|-----------------------------------------|-----|-----|-----------------------------|------|-----|--------------------------------|-----|-----|
|                                                                |                                                                                                                                                                                                                                                                                                         |                                                                                                                                                                                                                                                                                                               | <table><tr><td>Doctor in training</td><td>48</td></tr><tr><td>Advanced practice provider</td><td>56</td></tr><tr><td>Respiratory therapist</td><td>55</td></tr><tr><td>Nurse</td><td>64</td></tr></table> <p>n not reported</p> <p><b>Association with stigmatization:</b></p> <p><b>Table 3</b></p> <table><tr><td>Outcome</td><td>RR (95% CI)</td></tr><tr><td>Emotional distress/burnout</td><td>1.32 (1.24–1.41)</td></tr></table> <p>Adjusted for: n.r.</p>                                                                                                                                                                                                                                                                                                                                                                                                                                                                                                                                                                                                                                                                                                                                                                                                                                                                                                                                                                                                                                                                                                                                                                                                                                                                                          | Doctor in training       | 48 | Advanced practice provider                           | 56   | Respiratory therapist                          | 55   | Nurse                                        | 64   | Outcome                                 | RR (95% CI) | Emotional distress/burnout                                | 1.32 (1.24–1.41) |  |          |          |                                                           |     |     |                                                     |     |      |                                                   |     |      |                                              |     |     |                                                                |     |      |                                           |     |     |                                         |     |     |                             |      |     |                                |     |     |
| Doctor in training                                             | 48                                                                                                                                                                                                                                                                                                      |                                                                                                                                                                                                                                                                                                               |                                                                                                                                                                                                                                                                                                                                                                                                                                                                                                                                                                                                                                                                                                                                                                                                                                                                                                                                                                                                                                                                                                                                                                                                                                                                                                                                                                                                                                                                                                                                                                                                                                                                                                                                                           |                          |    |                                                      |      |                                                |      |                                              |      |                                         |             |                                                           |                  |  |          |          |                                                           |     |     |                                                     |     |      |                                                   |     |      |                                              |     |     |                                                                |     |      |                                           |     |     |                                         |     |     |                             |      |     |                                |     |     |
| Advanced practice provider                                     | 56                                                                                                                                                                                                                                                                                                      |                                                                                                                                                                                                                                                                                                               |                                                                                                                                                                                                                                                                                                                                                                                                                                                                                                                                                                                                                                                                                                                                                                                                                                                                                                                                                                                                                                                                                                                                                                                                                                                                                                                                                                                                                                                                                                                                                                                                                                                                                                                                                           |                          |    |                                                      |      |                                                |      |                                              |      |                                         |             |                                                           |                  |  |          |          |                                                           |     |     |                                                     |     |      |                                                   |     |      |                                              |     |     |                                                                |     |      |                                           |     |     |                                         |     |     |                             |      |     |                                |     |     |
| Respiratory therapist                                          | 55                                                                                                                                                                                                                                                                                                      |                                                                                                                                                                                                                                                                                                               |                                                                                                                                                                                                                                                                                                                                                                                                                                                                                                                                                                                                                                                                                                                                                                                                                                                                                                                                                                                                                                                                                                                                                                                                                                                                                                                                                                                                                                                                                                                                                                                                                                                                                                                                                           |                          |    |                                                      |      |                                                |      |                                              |      |                                         |             |                                                           |                  |  |          |          |                                                           |     |     |                                                     |     |      |                                                   |     |      |                                              |     |     |                                                                |     |      |                                           |     |     |                                         |     |     |                             |      |     |                                |     |     |
| Nurse                                                          | 64                                                                                                                                                                                                                                                                                                      |                                                                                                                                                                                                                                                                                                               |                                                                                                                                                                                                                                                                                                                                                                                                                                                                                                                                                                                                                                                                                                                                                                                                                                                                                                                                                                                                                                                                                                                                                                                                                                                                                                                                                                                                                                                                                                                                                                                                                                                                                                                                                           |                          |    |                                                      |      |                                                |      |                                              |      |                                         |             |                                                           |                  |  |          |          |                                                           |     |     |                                                     |     |      |                                                   |     |      |                                              |     |     |                                                                |     |      |                                           |     |     |                                         |     |     |                             |      |     |                                |     |     |
| Outcome                                                        | RR (95% CI)                                                                                                                                                                                                                                                                                             |                                                                                                                                                                                                                                                                                                               |                                                                                                                                                                                                                                                                                                                                                                                                                                                                                                                                                                                                                                                                                                                                                                                                                                                                                                                                                                                                                                                                                                                                                                                                                                                                                                                                                                                                                                                                                                                                                                                                                                                                                                                                                           |                          |    |                                                      |      |                                                |      |                                              |      |                                         |             |                                                           |                  |  |          |          |                                                           |     |     |                                                     |     |      |                                                   |     |      |                                              |     |     |                                                                |     |      |                                           |     |     |                                         |     |     |                             |      |     |                                |     |     |
| Emotional distress/burnout                                     | 1.32 (1.24–1.41)                                                                                                                                                                                                                                                                                        |                                                                                                                                                                                                                                                                                                               |                                                                                                                                                                                                                                                                                                                                                                                                                                                                                                                                                                                                                                                                                                                                                                                                                                                                                                                                                                                                                                                                                                                                                                                                                                                                                                                                                                                                                                                                                                                                                                                                                                                                                                                                                           |                          |    |                                                      |      |                                                |      |                                              |      |                                         |             |                                                           |                  |  |          |          |                                                           |     |     |                                                     |     |      |                                                   |     |      |                                              |     |     |                                                                |     |      |                                           |     |     |                                         |     |     |                             |      |     |                                |     |     |
| 851<br>Taylor,<br>2020<br>Canada                               | Attitudes from the general population towards HCW<br><br>HCW Stigmatization Survey: self-developed, 8 items, 5-point scale (0=strongly disagree, 4=strongly agree), excellent reliability<br><br><b>Forms of stigmatization:</b><br><u>Public Stigma: stereotypes, discrimination, social exclusion</u> | Covid Stress Syndrome (CSS): 5 items<br>1. Fears about COVID-19 dangerousness and contamination, 2. Fears about socio-economic effects of COVID-19, 3. Fears that foreigners are spreading COVID-19, 4. COVID-related traumatic stress symptoms, 5. COVID-related compulsive checking and reassurance-seeking | <p><b>Prevalence:</b><br/>not reported</p> <p><b>Association with stigmatization:</b><br/><b>Tab.: Correlation between CSS and HCW stigmatization survey</b></p> <table><tr><td>Covid Stress Scale (CSS)</td><td>R</td></tr><tr><td>Fears about COVID-19 dangerousness and contamination</td><td>0.45</td></tr><tr><td>Fears about socio-economic effects of COVID-19</td><td>0.41</td></tr><tr><td>Fears that foreigners are spreading COVID-19</td><td>0.32</td></tr><tr><td>COVID-related traumatic stress symptoms</td><td>0.30</td></tr><tr><td>COVID-related compulsive checking and reassurance-seeking</td><td>0.24</td></tr></table> <p><b>Tab: Factor loadings for measures of stigma, avoidance, and COVID Stress Syndrome.</b></p> <table><tr><td></td><td>Factor 1</td><td>Factor 2</td></tr><tr><td>CSS: Fears about COVID-19 dangerousness and contamination</td><td>.81</td><td>.07</td></tr><tr><td>CSS: Fears about socio-economic effects of COVID-19</td><td>.80</td><td>-.04</td></tr><tr><td>CSS: Fears that foreigners are spreading COVID-19</td><td>.69</td><td>-.06</td></tr><tr><td>CSS: COVID-related traumatic stress symptoms</td><td>.68</td><td>.03</td></tr><tr><td>CSS: COVID-related compulsive checking and reassurance-seeking</td><td>.69</td><td>-.13</td></tr><tr><td>Avoidance of supermarkets and drug stores</td><td>.43</td><td>.13</td></tr><tr><td>Healthcare Worker Stigmatization Survey</td><td>.42</td><td>.19</td></tr><tr><td>Preference for staying home</td><td>-.03</td><td>.90</td></tr><tr><td>Preference for avoiding people</td><td>.08</td><td>.76</td></tr></table> <p>*maximum likelihood factor analysis of the COVID Stress Scales, avoidance measures, and HCW Stigmatization Survey</p> | Covid Stress Scale (CSS) | R  | Fears about COVID-19 dangerousness and contamination | 0.45 | Fears about socio-economic effects of COVID-19 | 0.41 | Fears that foreigners are spreading COVID-19 | 0.32 | COVID-related traumatic stress symptoms | 0.30        | COVID-related compulsive checking and reassurance-seeking | 0.24             |  | Factor 1 | Factor 2 | CSS: Fears about COVID-19 dangerousness and contamination | .81 | .07 | CSS: Fears about socio-economic effects of COVID-19 | .80 | -.04 | CSS: Fears that foreigners are spreading COVID-19 | .69 | -.06 | CSS: COVID-related traumatic stress symptoms | .68 | .03 | CSS: COVID-related compulsive checking and reassurance-seeking | .69 | -.13 | Avoidance of supermarkets and drug stores | .43 | .13 | Healthcare Worker Stigmatization Survey | .42 | .19 | Preference for staying home | -.03 | .90 | Preference for avoiding people | .08 | .76 |
| Covid Stress Scale (CSS)                                       | R                                                                                                                                                                                                                                                                                                       |                                                                                                                                                                                                                                                                                                               |                                                                                                                                                                                                                                                                                                                                                                                                                                                                                                                                                                                                                                                                                                                                                                                                                                                                                                                                                                                                                                                                                                                                                                                                                                                                                                                                                                                                                                                                                                                                                                                                                                                                                                                                                           |                          |    |                                                      |      |                                                |      |                                              |      |                                         |             |                                                           |                  |  |          |          |                                                           |     |     |                                                     |     |      |                                                   |     |      |                                              |     |     |                                                                |     |      |                                           |     |     |                                         |     |     |                             |      |     |                                |     |     |
| Fears about COVID-19 dangerousness and contamination           | 0.45                                                                                                                                                                                                                                                                                                    |                                                                                                                                                                                                                                                                                                               |                                                                                                                                                                                                                                                                                                                                                                                                                                                                                                                                                                                                                                                                                                                                                                                                                                                                                                                                                                                                                                                                                                                                                                                                                                                                                                                                                                                                                                                                                                                                                                                                                                                                                                                                                           |                          |    |                                                      |      |                                                |      |                                              |      |                                         |             |                                                           |                  |  |          |          |                                                           |     |     |                                                     |     |      |                                                   |     |      |                                              |     |     |                                                                |     |      |                                           |     |     |                                         |     |     |                             |      |     |                                |     |     |
| Fears about socio-economic effects of COVID-19                 | 0.41                                                                                                                                                                                                                                                                                                    |                                                                                                                                                                                                                                                                                                               |                                                                                                                                                                                                                                                                                                                                                                                                                                                                                                                                                                                                                                                                                                                                                                                                                                                                                                                                                                                                                                                                                                                                                                                                                                                                                                                                                                                                                                                                                                                                                                                                                                                                                                                                                           |                          |    |                                                      |      |                                                |      |                                              |      |                                         |             |                                                           |                  |  |          |          |                                                           |     |     |                                                     |     |      |                                                   |     |      |                                              |     |     |                                                                |     |      |                                           |     |     |                                         |     |     |                             |      |     |                                |     |     |
| Fears that foreigners are spreading COVID-19                   | 0.32                                                                                                                                                                                                                                                                                                    |                                                                                                                                                                                                                                                                                                               |                                                                                                                                                                                                                                                                                                                                                                                                                                                                                                                                                                                                                                                                                                                                                                                                                                                                                                                                                                                                                                                                                                                                                                                                                                                                                                                                                                                                                                                                                                                                                                                                                                                                                                                                                           |                          |    |                                                      |      |                                                |      |                                              |      |                                         |             |                                                           |                  |  |          |          |                                                           |     |     |                                                     |     |      |                                                   |     |      |                                              |     |     |                                                                |     |      |                                           |     |     |                                         |     |     |                             |      |     |                                |     |     |
| COVID-related traumatic stress symptoms                        | 0.30                                                                                                                                                                                                                                                                                                    |                                                                                                                                                                                                                                                                                                               |                                                                                                                                                                                                                                                                                                                                                                                                                                                                                                                                                                                                                                                                                                                                                                                                                                                                                                                                                                                                                                                                                                                                                                                                                                                                                                                                                                                                                                                                                                                                                                                                                                                                                                                                                           |                          |    |                                                      |      |                                                |      |                                              |      |                                         |             |                                                           |                  |  |          |          |                                                           |     |     |                                                     |     |      |                                                   |     |      |                                              |     |     |                                                                |     |      |                                           |     |     |                                         |     |     |                             |      |     |                                |     |     |
| COVID-related compulsive checking and reassurance-seeking      | 0.24                                                                                                                                                                                                                                                                                                    |                                                                                                                                                                                                                                                                                                               |                                                                                                                                                                                                                                                                                                                                                                                                                                                                                                                                                                                                                                                                                                                                                                                                                                                                                                                                                                                                                                                                                                                                                                                                                                                                                                                                                                                                                                                                                                                                                                                                                                                                                                                                                           |                          |    |                                                      |      |                                                |      |                                              |      |                                         |             |                                                           |                  |  |          |          |                                                           |     |     |                                                     |     |      |                                                   |     |      |                                              |     |     |                                                                |     |      |                                           |     |     |                                         |     |     |                             |      |     |                                |     |     |
|                                                                | Factor 1                                                                                                                                                                                                                                                                                                | Factor 2                                                                                                                                                                                                                                                                                                      |                                                                                                                                                                                                                                                                                                                                                                                                                                                                                                                                                                                                                                                                                                                                                                                                                                                                                                                                                                                                                                                                                                                                                                                                                                                                                                                                                                                                                                                                                                                                                                                                                                                                                                                                                           |                          |    |                                                      |      |                                                |      |                                              |      |                                         |             |                                                           |                  |  |          |          |                                                           |     |     |                                                     |     |      |                                                   |     |      |                                              |     |     |                                                                |     |      |                                           |     |     |                                         |     |     |                             |      |     |                                |     |     |
| CSS: Fears about COVID-19 dangerousness and contamination      | .81                                                                                                                                                                                                                                                                                                     | .07                                                                                                                                                                                                                                                                                                           |                                                                                                                                                                                                                                                                                                                                                                                                                                                                                                                                                                                                                                                                                                                                                                                                                                                                                                                                                                                                                                                                                                                                                                                                                                                                                                                                                                                                                                                                                                                                                                                                                                                                                                                                                           |                          |    |                                                      |      |                                                |      |                                              |      |                                         |             |                                                           |                  |  |          |          |                                                           |     |     |                                                     |     |      |                                                   |     |      |                                              |     |     |                                                                |     |      |                                           |     |     |                                         |     |     |                             |      |     |                                |     |     |
| CSS: Fears about socio-economic effects of COVID-19            | .80                                                                                                                                                                                                                                                                                                     | -.04                                                                                                                                                                                                                                                                                                          |                                                                                                                                                                                                                                                                                                                                                                                                                                                                                                                                                                                                                                                                                                                                                                                                                                                                                                                                                                                                                                                                                                                                                                                                                                                                                                                                                                                                                                                                                                                                                                                                                                                                                                                                                           |                          |    |                                                      |      |                                                |      |                                              |      |                                         |             |                                                           |                  |  |          |          |                                                           |     |     |                                                     |     |      |                                                   |     |      |                                              |     |     |                                                                |     |      |                                           |     |     |                                         |     |     |                             |      |     |                                |     |     |
| CSS: Fears that foreigners are spreading COVID-19              | .69                                                                                                                                                                                                                                                                                                     | -.06                                                                                                                                                                                                                                                                                                          |                                                                                                                                                                                                                                                                                                                                                                                                                                                                                                                                                                                                                                                                                                                                                                                                                                                                                                                                                                                                                                                                                                                                                                                                                                                                                                                                                                                                                                                                                                                                                                                                                                                                                                                                                           |                          |    |                                                      |      |                                                |      |                                              |      |                                         |             |                                                           |                  |  |          |          |                                                           |     |     |                                                     |     |      |                                                   |     |      |                                              |     |     |                                                                |     |      |                                           |     |     |                                         |     |     |                             |      |     |                                |     |     |
| CSS: COVID-related traumatic stress symptoms                   | .68                                                                                                                                                                                                                                                                                                     | .03                                                                                                                                                                                                                                                                                                           |                                                                                                                                                                                                                                                                                                                                                                                                                                                                                                                                                                                                                                                                                                                                                                                                                                                                                                                                                                                                                                                                                                                                                                                                                                                                                                                                                                                                                                                                                                                                                                                                                                                                                                                                                           |                          |    |                                                      |      |                                                |      |                                              |      |                                         |             |                                                           |                  |  |          |          |                                                           |     |     |                                                     |     |      |                                                   |     |      |                                              |     |     |                                                                |     |      |                                           |     |     |                                         |     |     |                             |      |     |                                |     |     |
| CSS: COVID-related compulsive checking and reassurance-seeking | .69                                                                                                                                                                                                                                                                                                     | -.13                                                                                                                                                                                                                                                                                                          |                                                                                                                                                                                                                                                                                                                                                                                                                                                                                                                                                                                                                                                                                                                                                                                                                                                                                                                                                                                                                                                                                                                                                                                                                                                                                                                                                                                                                                                                                                                                                                                                                                                                                                                                                           |                          |    |                                                      |      |                                                |      |                                              |      |                                         |             |                                                           |                  |  |          |          |                                                           |     |     |                                                     |     |      |                                                   |     |      |                                              |     |     |                                                                |     |      |                                           |     |     |                                         |     |     |                             |      |     |                                |     |     |
| Avoidance of supermarkets and drug stores                      | .43                                                                                                                                                                                                                                                                                                     | .13                                                                                                                                                                                                                                                                                                           |                                                                                                                                                                                                                                                                                                                                                                                                                                                                                                                                                                                                                                                                                                                                                                                                                                                                                                                                                                                                                                                                                                                                                                                                                                                                                                                                                                                                                                                                                                                                                                                                                                                                                                                                                           |                          |    |                                                      |      |                                                |      |                                              |      |                                         |             |                                                           |                  |  |          |          |                                                           |     |     |                                                     |     |      |                                                   |     |      |                                              |     |     |                                                                |     |      |                                           |     |     |                                         |     |     |                             |      |     |                                |     |     |
| Healthcare Worker Stigmatization Survey                        | .42                                                                                                                                                                                                                                                                                                     | .19                                                                                                                                                                                                                                                                                                           |                                                                                                                                                                                                                                                                                                                                                                                                                                                                                                                                                                                                                                                                                                                                                                                                                                                                                                                                                                                                                                                                                                                                                                                                                                                                                                                                                                                                                                                                                                                                                                                                                                                                                                                                                           |                          |    |                                                      |      |                                                |      |                                              |      |                                         |             |                                                           |                  |  |          |          |                                                           |     |     |                                                     |     |      |                                                   |     |      |                                              |     |     |                                                                |     |      |                                           |     |     |                                         |     |     |                             |      |     |                                |     |     |
| Preference for staying home                                    | -.03                                                                                                                                                                                                                                                                                                    | .90                                                                                                                                                                                                                                                                                                           |                                                                                                                                                                                                                                                                                                                                                                                                                                                                                                                                                                                                                                                                                                                                                                                                                                                                                                                                                                                                                                                                                                                                                                                                                                                                                                                                                                                                                                                                                                                                                                                                                                                                                                                                                           |                          |    |                                                      |      |                                                |      |                                              |      |                                         |             |                                                           |                  |  |          |          |                                                           |     |     |                                                     |     |      |                                                   |     |      |                                              |     |     |                                                                |     |      |                                           |     |     |                                         |     |     |                             |      |     |                                |     |     |
| Preference for avoiding people                                 | .08                                                                                                                                                                                                                                                                                                     | .76                                                                                                                                                                                                                                                                                                           |                                                                                                                                                                                                                                                                                                                                                                                                                                                                                                                                                                                                                                                                                                                                                                                                                                                                                                                                                                                                                                                                                                                                                                                                                                                                                                                                                                                                                                                                                                                                                                                                                                                                                                                                                           |                          |    |                                                      |      |                                                |      |                                              |      |                                         |             |                                                           |                  |  |          |          |                                                           |     |     |                                                     |     |      |                                                   |     |      |                                              |     |     |                                                                |     |      |                                           |     |     |                                         |     |     |                             |      |     |                                |     |     |



| General                  | Exposure                                                                                                                                                                                                                                                                                                     | Outcome                                                                                                                                                                                                                                                             | Results                                                                                                                                                                                                                                                                                                                                                                                                                                                                                                                                                                                                                                                                                                                                                                                                                                                                                                                                            |                      |          |          |              |           |      |              |      |           |            |      |      |                |      |      |      |  |                  |                 |                 |                      |              |        |        |        |        |
|--------------------------|--------------------------------------------------------------------------------------------------------------------------------------------------------------------------------------------------------------------------------------------------------------------------------------------------------------|---------------------------------------------------------------------------------------------------------------------------------------------------------------------------------------------------------------------------------------------------------------------|----------------------------------------------------------------------------------------------------------------------------------------------------------------------------------------------------------------------------------------------------------------------------------------------------------------------------------------------------------------------------------------------------------------------------------------------------------------------------------------------------------------------------------------------------------------------------------------------------------------------------------------------------------------------------------------------------------------------------------------------------------------------------------------------------------------------------------------------------------------------------------------------------------------------------------------------------|----------------------|----------|----------|--------------|-----------|------|--------------|------|-----------|------------|------|------|----------------|------|------|------|--|------------------|-----------------|-----------------|----------------------|--------------|--------|--------|--------|--------|
| 865 Uvais, India, 2020   | <p>Perceived stigma: stigma scale with 13 items (each scored on a 5-point Likert scale, total score 0 - 52 total score ≥26: high levels of perceived stigma)</p> <p><b>Form of stigmatization:</b><br/><u>Self-stigma (perceived): discrimination, social exclusion</u></p> <p>Self-stigma (anticipated)</p> | Perceived Stress Scale (PSS-10): 10 items, 5-point Likert scale, total score 0– 40                                                                                                                                                                                  | <p><b>Prevalence:</b><br/>Mean: 20.6 (SD 6.76)</p> <p><b>Association with stigmatization:</b><br/>Correlation stigma and Stress: Pearson correlation coefficient r = 0.604</p>                                                                                                                                                                                                                                                                                                                                                                                                                                                                                                                                                                                                                                                                                                                                                                     |                      |          |          |              |           |      |              |      |           |            |      |      |                |      |      |      |  |                  |                 |                 |                      |              |        |        |        |        |
| 7220 Zandifar 2020, Iran | <p>Stigma: 22-item modified stigma-related questionnaire adopted from the HIV Stigma Scale (5-point Likert scale: strongly disagree to strongly agree)</p> <p><b>Form of stigmatization:</b><br/><u>Self-stigma (perceived): discrimination</u></p>                                                          | PTDS: Posttraumatic Stress Disorder 8-Item Questionnaire (PTSD-8)                                                                                                                                                                                                   | <p><b>Prevalence:</b></p> <p><b>Table 1 and Table 2: Prevalence of intrusion, avoidance, and hypervigilance (in %)</b></p> <table><tr><td></td><td>Male</td><td>Female</td><td>Total sample</td></tr><tr><td>Intrusion</td><td>37.4</td><td>46.9</td><td>42.2</td></tr><tr><td>Avoidance</td><td>23.5</td><td>35.3</td><td>31.4</td></tr><tr><td>Hypervigilance</td><td>33.1</td><td>39.7</td><td>37.2</td></tr></table> <p>- Significant difference between males and females for intrusion and avoidance, but not for hypervigilance</p> <p><b>Association with stigmatization:</b><br/><b>Table 4: Correlation between PTSD and stigma (with Spearman correlation)</b></p> <table><tr><td></td><td>PTDS total score</td><td>Intrusion score</td><td>Avoidance score</td><td>Hypervigilance score</td></tr><tr><td>Stigma score</td><td>0.836*</td><td>0.724*</td><td>0.693*</td><td>0.767*</td></tr></table> <p>* Statistically significant</p> |                      | Male     | Female   | Total sample | Intrusion | 37.4 | 46.9         | 42.2 | Avoidance | 23.5       | 35.3 | 31.4 | Hypervigilance | 33.1 | 39.7 | 37.2 |  | PTDS total score | Intrusion score | Avoidance score | Hypervigilance score | Stigma score | 0.836* | 0.724* | 0.693* | 0.767* |
|                          | Male                                                                                                                                                                                                                                                                                                         | Female                                                                                                                                                                                                                                                              | Total sample                                                                                                                                                                                                                                                                                                                                                                                                                                                                                                                                                                                                                                                                                                                                                                                                                                                                                                                                       |                      |          |          |              |           |      |              |      |           |            |      |      |                |      |      |      |  |                  |                 |                 |                      |              |        |        |        |        |
| Intrusion                | 37.4                                                                                                                                                                                                                                                                                                         | 46.9                                                                                                                                                                                                                                                                | 42.2                                                                                                                                                                                                                                                                                                                                                                                                                                                                                                                                                                                                                                                                                                                                                                                                                                                                                                                                               |                      |          |          |              |           |      |              |      |           |            |      |      |                |      |      |      |  |                  |                 |                 |                      |              |        |        |        |        |
| Avoidance                | 23.5                                                                                                                                                                                                                                                                                                         | 35.3                                                                                                                                                                                                                                                                | 31.4                                                                                                                                                                                                                                                                                                                                                                                                                                                                                                                                                                                                                                                                                                                                                                                                                                                                                                                                               |                      |          |          |              |           |      |              |      |           |            |      |      |                |      |      |      |  |                  |                 |                 |                      |              |        |        |        |        |
| Hypervigilance           | 33.1                                                                                                                                                                                                                                                                                                         | 39.7                                                                                                                                                                                                                                                                | 37.2                                                                                                                                                                                                                                                                                                                                                                                                                                                                                                                                                                                                                                                                                                                                                                                                                                                                                                                                               |                      |          |          |              |           |      |              |      |           |            |      |      |                |      |      |      |  |                  |                 |                 |                      |              |        |        |        |        |
|                          | PTDS total score                                                                                                                                                                                                                                                                                             | Intrusion score                                                                                                                                                                                                                                                     | Avoidance score                                                                                                                                                                                                                                                                                                                                                                                                                                                                                                                                                                                                                                                                                                                                                                                                                                                                                                                                    | Hypervigilance score |          |          |              |           |      |              |      |           |            |      |      |                |      |      |      |  |                  |                 |                 |                      |              |        |        |        |        |
| Stigma score             | 0.836*                                                                                                                                                                                                                                                                                                       | 0.724*                                                                                                                                                                                                                                                              | 0.693*                                                                                                                                                                                                                                                                                                                                                                                                                                                                                                                                                                                                                                                                                                                                                                                                                                                                                                                                             | 0.767*               |          |          |              |           |      |              |      |           |            |      |      |                |      |      |      |  |                  |                 |                 |                      |              |        |        |        |        |
| 905 Zhu 2020, China      | <p>Feeling that family and friends avoid contact because of work: 1 item question (answer options: agree, disagree, unsure)</p> <p><b>Form of stigmatization:</b><br/><u>Self-stigma (perceived): social exclusion</u></p>                                                                                   | <p>Depression: Patient Health Questionnaire 9 (PHQ-9, major depression: score ≥10)</p> <p>Anxiety: Generalized Anxiety Disorder 7 (GAD-7, anxiety disorder: score ≥8)</p> <p>Psychological stress: Impact of Event Scale-Revised (IES-R, stress: score: &gt;33)</p> | <p><b>Prevalence:</b></p> <p><b>Table 1 and Figure 2</b></p> <table><tr><td><b>Outcome</b></td><td><b>n</b></td><td><b>%</b></td></tr><tr><td>No symptoms</td><td>n.r.</td><td>63.4</td></tr><tr><td>Acute stress</td><td>1509</td><td>29.8</td></tr><tr><td>Depression</td><td>381</td><td>13.5</td></tr><tr><td>Anxiety</td><td>1218</td><td>24.1</td></tr></table>                                                                                                                                                                                                                                                                                                                                                                                                                                                                                                                                                                              | <b>Outcome</b>       | <b>n</b> | <b>%</b> | No symptoms  | n.r.      | 63.4 | Acute stress | 1509 | 29.8      | Depression | 381  | 13.5 | Anxiety        | 1218 | 24.1 |      |  |                  |                 |                 |                      |              |        |        |        |        |
| <b>Outcome</b>           | <b>n</b>                                                                                                                                                                                                                                                                                                     | <b>%</b>                                                                                                                                                                                                                                                            |                                                                                                                                                                                                                                                                                                                                                                                                                                                                                                                                                                                                                                                                                                                                                                                                                                                                                                                                                    |                      |          |          |              |           |      |              |      |           |            |      |      |                |      |      |      |  |                  |                 |                 |                      |              |        |        |        |        |
| No symptoms              | n.r.                                                                                                                                                                                                                                                                                                         | 63.4                                                                                                                                                                                                                                                                |                                                                                                                                                                                                                                                                                                                                                                                                                                                                                                                                                                                                                                                                                                                                                                                                                                                                                                                                                    |                      |          |          |              |           |      |              |      |           |            |      |      |                |      |      |      |  |                  |                 |                 |                      |              |        |        |        |        |
| Acute stress             | 1509                                                                                                                                                                                                                                                                                                         | 29.8                                                                                                                                                                                                                                                                |                                                                                                                                                                                                                                                                                                                                                                                                                                                                                                                                                                                                                                                                                                                                                                                                                                                                                                                                                    |                      |          |          |              |           |      |              |      |           |            |      |      |                |      |      |      |  |                  |                 |                 |                      |              |        |        |        |        |
| Depression               | 381                                                                                                                                                                                                                                                                                                          | 13.5                                                                                                                                                                                                                                                                |                                                                                                                                                                                                                                                                                                                                                                                                                                                                                                                                                                                                                                                                                                                                                                                                                                                                                                                                                    |                      |          |          |              |           |      |              |      |           |            |      |      |                |      |      |      |  |                  |                 |                 |                      |              |        |        |        |        |
| Anxiety                  | 1218                                                                                                                                                                                                                                                                                                         | 24.1                                                                                                                                                                                                                                                                |                                                                                                                                                                                                                                                                                                                                                                                                                                                                                                                                                                                                                                                                                                                                                                                                                                                                                                                                                    |                      |          |          |              |           |      |              |      |           |            |      |      |                |      |      |      |  |                  |                 |                 |                      |              |        |        |        |        |

| General | Exposure | Outcome | Results                                                                                         |                                     |                                        |
|---------|----------|---------|-------------------------------------------------------------------------------------------------|-------------------------------------|----------------------------------------|
|         |          |         | Acute stress and depression                                                                     | n.r.                                | 1.5                                    |
|         |          |         | Acute stress and anxiety                                                                        | n.r.                                | 7.5                                    |
|         |          |         | Depression and anxiety                                                                          | n.r.                                | 0.9                                    |
|         |          |         | Acute stress and depression and anxiety                                                         | n.r.                                | 10.4                                   |
|         |          |         | n not reported                                                                                  |                                     |                                        |
|         |          |         | <b>Association with stigmatization:</b>                                                         |                                     |                                        |
|         |          |         | <b>Table 2: Depression</b>                                                                      |                                     |                                        |
|         |          |         |                                                                                                 | Depression<br>(n = 681)             | No depression<br>(n = 4,381)           |
|         |          |         | Do you feel that family members and friends have avoided contact with you because of your work? |                                     |                                        |
|         |          |         | Disagree                                                                                        | 215 (31.6%)                         | 2298 (52.5%)                           |
|         |          |         | Agree                                                                                           | 240 (35.2%)                         | 747 (17.1%)                            |
|         |          |         | Unsure                                                                                          | 226 (33.2%)                         | 1336 (30.5%)                           |
|         |          |         | <b>Table 2: Anxiety</b>                                                                         |                                     |                                        |
|         |          |         |                                                                                                 | Anxiety<br>(n = 1,218)              | No anxiety<br>(n = 3,844)              |
|         |          |         | Do you feel that family members and friends have avoided contact with you because of your work? |                                     |                                        |
|         |          |         | Disagree                                                                                        | 414 (34.0%)                         | 2099 (54.6%)                           |
|         |          |         | Agree                                                                                           | 389 (31.9%)                         | 598 (15.6%)                            |
|         |          |         | Unsure                                                                                          | 415 (34.1%)                         | 1147 (29.8%)                           |
|         |          |         | <b>Table 2: Psychological stress</b>                                                            |                                     |                                        |
|         |          |         |                                                                                                 | Psychological stress<br>(n = 1,509) | No psychological stress<br>(n = 3,553) |
|         |          |         | Do you feel that family members and friends have avoided contact with you because of your work? |                                     |                                        |
|         |          |         | Disagree                                                                                        | 510 (33.8%)                         | 2003 (56.4%)                           |
|         |          |         | Agree                                                                                           | 463 (30.7%)                         | 524 (14.8%)                            |
|         |          |         | Unsure                                                                                          | 536 (35.5%)                         | 1026 (28.9%)                           |
|         |          |         | <b>Table 3 and Supplementary Material (ST1 and ST2): Depression</b>                             |                                     |                                        |
|         |          |         |                                                                                                 | Total sample<br>OR (95% CI)         | Men<br>OR (95% CI)                     |
|         |          |         |                                                                                                 |                                     | Women<br>OR (95% CI)                   |

| General                                                       | Exposure                                                                                                                                                                                                       | Outcome                                  | Results                                                                                                                                                                                                                                                                                                                                                                                                                                                                                                                                                                                                                                                                                                                                                                                                                                                                                                                                                                                                                                                                                                                                                                                                                                                                                                                                                                                                                                                                                                                                                                                                                                                                                                                                                                                                          |                                                               |  |  |  |             |                 |                 |                 |       |                  |      |                  |        |                  |      |                  |  |                             |                    |                      |                                                               |  |  |  |             |                 |                 |                 |       |                  |      |                  |        |                  |      |                  |  |                             |                    |                      |                                                               |  |  |  |             |                 |                 |                 |       |                  |      |                  |        |                  |      |                  |
|---------------------------------------------------------------|----------------------------------------------------------------------------------------------------------------------------------------------------------------------------------------------------------------|------------------------------------------|------------------------------------------------------------------------------------------------------------------------------------------------------------------------------------------------------------------------------------------------------------------------------------------------------------------------------------------------------------------------------------------------------------------------------------------------------------------------------------------------------------------------------------------------------------------------------------------------------------------------------------------------------------------------------------------------------------------------------------------------------------------------------------------------------------------------------------------------------------------------------------------------------------------------------------------------------------------------------------------------------------------------------------------------------------------------------------------------------------------------------------------------------------------------------------------------------------------------------------------------------------------------------------------------------------------------------------------------------------------------------------------------------------------------------------------------------------------------------------------------------------------------------------------------------------------------------------------------------------------------------------------------------------------------------------------------------------------------------------------------------------------------------------------------------------------|---------------------------------------------------------------|--|--|--|-------------|-----------------|-----------------|-----------------|-------|------------------|------|------------------|--------|------------------|------|------------------|--|-----------------------------|--------------------|----------------------|---------------------------------------------------------------|--|--|--|-------------|-----------------|-----------------|-----------------|-------|------------------|------|------------------|--------|------------------|------|------------------|--|-----------------------------|--------------------|----------------------|---------------------------------------------------------------|--|--|--|-------------|-----------------|-----------------|-----------------|-------|------------------|------|------------------|--------|------------------|------|------------------|
|                                                               |                                                                                                                                                                                                                |                                          | <table> <tr> <td>Feeling that family and friends avoid contact because of work</td><td></td><td></td><td></td></tr> <tr> <td>Don't avoid</td><td>1.0 (Reference)</td><td>1.0 (Reference)</td><td>1.0 (Reference)</td></tr> <tr> <td>Avoid</td><td>1.94 (1.55-2.42)</td><td>n.r.</td><td>1.99 (1.57-2.52)</td></tr> <tr> <td>Unsure</td><td>1.21 (0.97-1.50)</td><td>n.r.</td><td>1.20 (0.95-1.51)</td></tr> </table> <p><b>Table 3 and Supplementary Material (ST1 and ST2): Anxiety</b></p> <table> <tr> <td></td><td>Total sample<br/>OR (95% CI)</td><td>Men<br/>OR (95% CI)</td><td>Women<br/>OR (95% CI)</td></tr> <tr> <td>Feeling that family and friends avoid contact because of work</td><td></td><td></td><td></td></tr> <tr> <td>Don't avoid</td><td>1.0 (Reference)</td><td>1.0 (Reference)</td><td>1.0 (Reference)</td></tr> <tr> <td>Avoid</td><td>1.83 (1.52-2.21)</td><td>n.r.</td><td>2.03 (1.42-2.90)</td></tr> <tr> <td>Unsure</td><td>1.22 (1.03-1.45)</td><td>n.r.</td><td>1.19 (0.85-1.67)</td></tr> </table> <p><b>Table 3 and Supplementary Material (ST1 and ST2): Psychological stress</b></p> <table> <tr> <td></td><td>Total sample<br/>OR (95% CI)</td><td>Men<br/>OR (95% CI)</td><td>Women<br/>OR (95% CI)</td></tr> <tr> <td>Feeling that family and friends avoid contact because of work</td><td></td><td></td><td></td></tr> <tr> <td>Don't avoid</td><td>1.0 (Reference)</td><td>1.0 (Reference)</td><td>1.0 (Reference)</td></tr> <tr> <td>Avoid</td><td>2.01 (1.69-2.40)</td><td>n.r.</td><td>1.45 (1.23-1.71)</td></tr> <tr> <td>Unsure</td><td>1.44 (1.23-1.69)</td><td>n.r.</td><td>0.70 (0.54-0.91)</td></tr> </table> <p>*all adjusted for: age, occupation, years of working, past medical history, parent status, work-related and COVID-19-related predictors</p> | Feeling that family and friends avoid contact because of work |  |  |  | Don't avoid | 1.0 (Reference) | 1.0 (Reference) | 1.0 (Reference) | Avoid | 1.94 (1.55-2.42) | n.r. | 1.99 (1.57-2.52) | Unsure | 1.21 (0.97-1.50) | n.r. | 1.20 (0.95-1.51) |  | Total sample<br>OR (95% CI) | Men<br>OR (95% CI) | Women<br>OR (95% CI) | Feeling that family and friends avoid contact because of work |  |  |  | Don't avoid | 1.0 (Reference) | 1.0 (Reference) | 1.0 (Reference) | Avoid | 1.83 (1.52-2.21) | n.r. | 2.03 (1.42-2.90) | Unsure | 1.22 (1.03-1.45) | n.r. | 1.19 (0.85-1.67) |  | Total sample<br>OR (95% CI) | Men<br>OR (95% CI) | Women<br>OR (95% CI) | Feeling that family and friends avoid contact because of work |  |  |  | Don't avoid | 1.0 (Reference) | 1.0 (Reference) | 1.0 (Reference) | Avoid | 2.01 (1.69-2.40) | n.r. | 1.45 (1.23-1.71) | Unsure | 1.44 (1.23-1.69) | n.r. | 0.70 (0.54-0.91) |
| Feeling that family and friends avoid contact because of work |                                                                                                                                                                                                                |                                          |                                                                                                                                                                                                                                                                                                                                                                                                                                                                                                                                                                                                                                                                                                                                                                                                                                                                                                                                                                                                                                                                                                                                                                                                                                                                                                                                                                                                                                                                                                                                                                                                                                                                                                                                                                                                                  |                                                               |  |  |  |             |                 |                 |                 |       |                  |      |                  |        |                  |      |                  |  |                             |                    |                      |                                                               |  |  |  |             |                 |                 |                 |       |                  |      |                  |        |                  |      |                  |  |                             |                    |                      |                                                               |  |  |  |             |                 |                 |                 |       |                  |      |                  |        |                  |      |                  |
| Don't avoid                                                   | 1.0 (Reference)                                                                                                                                                                                                | 1.0 (Reference)                          | 1.0 (Reference)                                                                                                                                                                                                                                                                                                                                                                                                                                                                                                                                                                                                                                                                                                                                                                                                                                                                                                                                                                                                                                                                                                                                                                                                                                                                                                                                                                                                                                                                                                                                                                                                                                                                                                                                                                                                  |                                                               |  |  |  |             |                 |                 |                 |       |                  |      |                  |        |                  |      |                  |  |                             |                    |                      |                                                               |  |  |  |             |                 |                 |                 |       |                  |      |                  |        |                  |      |                  |  |                             |                    |                      |                                                               |  |  |  |             |                 |                 |                 |       |                  |      |                  |        |                  |      |                  |
| Avoid                                                         | 1.94 (1.55-2.42)                                                                                                                                                                                               | n.r.                                     | 1.99 (1.57-2.52)                                                                                                                                                                                                                                                                                                                                                                                                                                                                                                                                                                                                                                                                                                                                                                                                                                                                                                                                                                                                                                                                                                                                                                                                                                                                                                                                                                                                                                                                                                                                                                                                                                                                                                                                                                                                 |                                                               |  |  |  |             |                 |                 |                 |       |                  |      |                  |        |                  |      |                  |  |                             |                    |                      |                                                               |  |  |  |             |                 |                 |                 |       |                  |      |                  |        |                  |      |                  |  |                             |                    |                      |                                                               |  |  |  |             |                 |                 |                 |       |                  |      |                  |        |                  |      |                  |
| Unsure                                                        | 1.21 (0.97-1.50)                                                                                                                                                                                               | n.r.                                     | 1.20 (0.95-1.51)                                                                                                                                                                                                                                                                                                                                                                                                                                                                                                                                                                                                                                                                                                                                                                                                                                                                                                                                                                                                                                                                                                                                                                                                                                                                                                                                                                                                                                                                                                                                                                                                                                                                                                                                                                                                 |                                                               |  |  |  |             |                 |                 |                 |       |                  |      |                  |        |                  |      |                  |  |                             |                    |                      |                                                               |  |  |  |             |                 |                 |                 |       |                  |      |                  |        |                  |      |                  |  |                             |                    |                      |                                                               |  |  |  |             |                 |                 |                 |       |                  |      |                  |        |                  |      |                  |
|                                                               | Total sample<br>OR (95% CI)                                                                                                                                                                                    | Men<br>OR (95% CI)                       | Women<br>OR (95% CI)                                                                                                                                                                                                                                                                                                                                                                                                                                                                                                                                                                                                                                                                                                                                                                                                                                                                                                                                                                                                                                                                                                                                                                                                                                                                                                                                                                                                                                                                                                                                                                                                                                                                                                                                                                                             |                                                               |  |  |  |             |                 |                 |                 |       |                  |      |                  |        |                  |      |                  |  |                             |                    |                      |                                                               |  |  |  |             |                 |                 |                 |       |                  |      |                  |        |                  |      |                  |  |                             |                    |                      |                                                               |  |  |  |             |                 |                 |                 |       |                  |      |                  |        |                  |      |                  |
| Feeling that family and friends avoid contact because of work |                                                                                                                                                                                                                |                                          |                                                                                                                                                                                                                                                                                                                                                                                                                                                                                                                                                                                                                                                                                                                                                                                                                                                                                                                                                                                                                                                                                                                                                                                                                                                                                                                                                                                                                                                                                                                                                                                                                                                                                                                                                                                                                  |                                                               |  |  |  |             |                 |                 |                 |       |                  |      |                  |        |                  |      |                  |  |                             |                    |                      |                                                               |  |  |  |             |                 |                 |                 |       |                  |      |                  |        |                  |      |                  |  |                             |                    |                      |                                                               |  |  |  |             |                 |                 |                 |       |                  |      |                  |        |                  |      |                  |
| Don't avoid                                                   | 1.0 (Reference)                                                                                                                                                                                                | 1.0 (Reference)                          | 1.0 (Reference)                                                                                                                                                                                                                                                                                                                                                                                                                                                                                                                                                                                                                                                                                                                                                                                                                                                                                                                                                                                                                                                                                                                                                                                                                                                                                                                                                                                                                                                                                                                                                                                                                                                                                                                                                                                                  |                                                               |  |  |  |             |                 |                 |                 |       |                  |      |                  |        |                  |      |                  |  |                             |                    |                      |                                                               |  |  |  |             |                 |                 |                 |       |                  |      |                  |        |                  |      |                  |  |                             |                    |                      |                                                               |  |  |  |             |                 |                 |                 |       |                  |      |                  |        |                  |      |                  |
| Avoid                                                         | 1.83 (1.52-2.21)                                                                                                                                                                                               | n.r.                                     | 2.03 (1.42-2.90)                                                                                                                                                                                                                                                                                                                                                                                                                                                                                                                                                                                                                                                                                                                                                                                                                                                                                                                                                                                                                                                                                                                                                                                                                                                                                                                                                                                                                                                                                                                                                                                                                                                                                                                                                                                                 |                                                               |  |  |  |             |                 |                 |                 |       |                  |      |                  |        |                  |      |                  |  |                             |                    |                      |                                                               |  |  |  |             |                 |                 |                 |       |                  |      |                  |        |                  |      |                  |  |                             |                    |                      |                                                               |  |  |  |             |                 |                 |                 |       |                  |      |                  |        |                  |      |                  |
| Unsure                                                        | 1.22 (1.03-1.45)                                                                                                                                                                                               | n.r.                                     | 1.19 (0.85-1.67)                                                                                                                                                                                                                                                                                                                                                                                                                                                                                                                                                                                                                                                                                                                                                                                                                                                                                                                                                                                                                                                                                                                                                                                                                                                                                                                                                                                                                                                                                                                                                                                                                                                                                                                                                                                                 |                                                               |  |  |  |             |                 |                 |                 |       |                  |      |                  |        |                  |      |                  |  |                             |                    |                      |                                                               |  |  |  |             |                 |                 |                 |       |                  |      |                  |        |                  |      |                  |  |                             |                    |                      |                                                               |  |  |  |             |                 |                 |                 |       |                  |      |                  |        |                  |      |                  |
|                                                               | Total sample<br>OR (95% CI)                                                                                                                                                                                    | Men<br>OR (95% CI)                       | Women<br>OR (95% CI)                                                                                                                                                                                                                                                                                                                                                                                                                                                                                                                                                                                                                                                                                                                                                                                                                                                                                                                                                                                                                                                                                                                                                                                                                                                                                                                                                                                                                                                                                                                                                                                                                                                                                                                                                                                             |                                                               |  |  |  |             |                 |                 |                 |       |                  |      |                  |        |                  |      |                  |  |                             |                    |                      |                                                               |  |  |  |             |                 |                 |                 |       |                  |      |                  |        |                  |      |                  |  |                             |                    |                      |                                                               |  |  |  |             |                 |                 |                 |       |                  |      |                  |        |                  |      |                  |
| Feeling that family and friends avoid contact because of work |                                                                                                                                                                                                                |                                          |                                                                                                                                                                                                                                                                                                                                                                                                                                                                                                                                                                                                                                                                                                                                                                                                                                                                                                                                                                                                                                                                                                                                                                                                                                                                                                                                                                                                                                                                                                                                                                                                                                                                                                                                                                                                                  |                                                               |  |  |  |             |                 |                 |                 |       |                  |      |                  |        |                  |      |                  |  |                             |                    |                      |                                                               |  |  |  |             |                 |                 |                 |       |                  |      |                  |        |                  |      |                  |  |                             |                    |                      |                                                               |  |  |  |             |                 |                 |                 |       |                  |      |                  |        |                  |      |                  |
| Don't avoid                                                   | 1.0 (Reference)                                                                                                                                                                                                | 1.0 (Reference)                          | 1.0 (Reference)                                                                                                                                                                                                                                                                                                                                                                                                                                                                                                                                                                                                                                                                                                                                                                                                                                                                                                                                                                                                                                                                                                                                                                                                                                                                                                                                                                                                                                                                                                                                                                                                                                                                                                                                                                                                  |                                                               |  |  |  |             |                 |                 |                 |       |                  |      |                  |        |                  |      |                  |  |                             |                    |                      |                                                               |  |  |  |             |                 |                 |                 |       |                  |      |                  |        |                  |      |                  |  |                             |                    |                      |                                                               |  |  |  |             |                 |                 |                 |       |                  |      |                  |        |                  |      |                  |
| Avoid                                                         | 2.01 (1.69-2.40)                                                                                                                                                                                               | n.r.                                     | 1.45 (1.23-1.71)                                                                                                                                                                                                                                                                                                                                                                                                                                                                                                                                                                                                                                                                                                                                                                                                                                                                                                                                                                                                                                                                                                                                                                                                                                                                                                                                                                                                                                                                                                                                                                                                                                                                                                                                                                                                 |                                                               |  |  |  |             |                 |                 |                 |       |                  |      |                  |        |                  |      |                  |  |                             |                    |                      |                                                               |  |  |  |             |                 |                 |                 |       |                  |      |                  |        |                  |      |                  |  |                             |                    |                      |                                                               |  |  |  |             |                 |                 |                 |       |                  |      |                  |        |                  |      |                  |
| Unsure                                                        | 1.44 (1.23-1.69)                                                                                                                                                                                               | n.r.                                     | 0.70 (0.54-0.91)                                                                                                                                                                                                                                                                                                                                                                                                                                                                                                                                                                                                                                                                                                                                                                                                                                                                                                                                                                                                                                                                                                                                                                                                                                                                                                                                                                                                                                                                                                                                                                                                                                                                                                                                                                                                 |                                                               |  |  |  |             |                 |                 |                 |       |                  |      |                  |        |                  |      |                  |  |                             |                    |                      |                                                               |  |  |  |             |                 |                 |                 |       |                  |      |                  |        |                  |      |                  |  |                             |                    |                      |                                                               |  |  |  |             |                 |                 |                 |       |                  |      |                  |        |                  |      |                  |
| 5386<br>Zolnikov<br>2020,<br>worldwide                        | Stigma<br><br><b>Form of stigmatization:</b><br><u>Self-stigma (perceived);</u><br><u>discrimination, social</u><br><u>exclusion, aggressive</u><br><u>behaviour/mobbing</u><br><br>Self-Stigma (internalized) | Negative feelings, stress, alcohol usage | <b>Prevalence:</b><br>n.a.<br><b>Association with stigmatization:</b><br>- common words to describe emotions and feelings as a result of being stigmatized, included " <i>sadness</i> ", feeling "blue" and " <i>extremely stress[ed]</i> " while living in a situation that " <i>is so demoralizing</i> "<br>- reactions to these feelings included alcohol use<br>→ quote: " <i>I feel very isolated, lonely, depressed even. I found my alcohol intake increased</i> "                                                                                                                                                                                                                                                                                                                                                                                                                                                                                                                                                                                                                                                                                                                                                                                                                                                                                                                                                                                                                                                                                                                                                                                                                                                                                                                                        |                                                               |  |  |  |             |                 |                 |                 |       |                  |      |                  |        |                  |      |                  |  |                             |                    |                      |                                                               |  |  |  |             |                 |                 |                 |       |                  |      |                  |        |                  |      |                  |  |                             |                    |                      |                                                               |  |  |  |             |                 |                 |                 |       |                  |      |                  |        |                  |      |                  |

n = sample size, n.a. = not applicable, n.r. = not reported, OR = odds ratio, RR = relative risk
