# Supplementary material for: Stigmatization from Work-Related COVID-19 Exposure: A Systematic Review with Meta-Analysis
Source: MDPI journal article supplement (doi:10.3390/ijerph18126183), 2021-06-08
Supplement: s1 [file s1]

| General                      | Study                                                                                                                                                                                                                                                     | Population                                                                                                                                                                                         | Exposure                                                                                                                | Outcome                                                                                                                                                                         | Results<br>Stigmatization<br>as outcome:<br><br>Descriptive<br>summary (qual-<br>itative/ explora-<br>tory studies)                                                                                                                                             | Results<br>Stigmatiza-<br>tion as out-<br>come:<br><br>Quantitative<br>(meta-analyti-<br>cal) results<br>(prevalence/<br>Incidence,<br>Relative Risk,<br>Odds Ratio) | Effect of stig-<br>matization on<br>health<br><br>Outcome:                     | Results<br>Effect of stig-<br>matization on<br>health:<br><br>Relative risk<br>(RR)/ Odds<br>Ratio (OR)/<br>or descriptive<br>summary                                                                               | Strengths (+),<br>weaknesses (-),<br>confounding,<br>other bias,<br>over- or under-<br>estimation of<br>potential<br>effects |
|------------------------------|-----------------------------------------------------------------------------------------------------------------------------------------------------------------------------------------------------------------------------------------------------------|----------------------------------------------------------------------------------------------------------------------------------------------------------------------------------------------------|-------------------------------------------------------------------------------------------------------------------------|---------------------------------------------------------------------------------------------------------------------------------------------------------------------------------|-----------------------------------------------------------------------------------------------------------------------------------------------------------------------------------------------------------------------------------------------------------------|----------------------------------------------------------------------------------------------------------------------------------------------------------------------|--------------------------------------------------------------------------------|---------------------------------------------------------------------------------------------------------------------------------------------------------------------------------------------------------------------|------------------------------------------------------------------------------------------------------------------------------|
| #<br>First Au-<br>thor, Year | Search period:<br>Inclusion crite-<br>ria:<br>Number of (all)<br>included stud-<br>ies in review:<br>n=<br>Number of<br>studies on<br>stigmatization<br>due to COVID-<br>19 included:<br>n= (total, co-<br>hort, case-con-<br>trol, cross-sec-<br>tional) | Job de-<br>scription:<br>Inclusion<br>criteria:<br>Reference<br>group:                                                                                                                             | <i>Refers to the<br/>circumstances<br/>when stigmati-<br/>zation was stud-<br/>ied (lockdown,<br/>social isolation)</i> | <i>Describe main<br/>topic of review</i><br><br><b>Form of stig-<br/>matization</b><br><br><i>Describe the<br/>form of stig-<br/>matization and<br/>how it was<br/>measured</i> | <i>Include a de-<br/>scriptive sum-<br/>mary of im-<br/>portant results if<br/>appropriate</i>                                                                                                                                                                  | <i>Describe the<br/>prevalence/ in-<br/>cidence of stig-<br/>matization</i>                                                                                          | <i>Describe the<br/>health out-<br/>come and how<br/>it was meas-<br/>ured</i> | <i>Include (if pos-<br/>sible) the risk<br/>estimates for<br/>the effect of<br/>stigmatization<br/>on health out-<br/>come<br/>If there is no<br/>risk estimate,<br/>give a descrip-<br/>tive summary</i>           |                                                                                                                              |
| #7183<br>Banerjee,<br>2020   | <b>Search period:</b><br>till June 2020<br><b>Inclusion/ cri-<br/>teria:</b><br>- sample sizes<br>≥10 participants<br>- studied preva-<br>lence/ surveys<br>of psychological<br>or psychosocial<br>problems in<br>South-Asian<br>(World Psychi-           | <b>Job de-<br/>scription:</b><br>HCWs and<br>general pop-<br>ulation<br><b>Inclusion<br/>criteria:</b><br>working in<br>close prox-<br>imity with in-<br>fected pa-<br>tients, aged<br>18–60 years | Not specified<br><br>(during outbreak<br>of COVID-19)                                                                   | Psychosocial<br>health and<br>well-being<br><b>Form of stig-<br/>matization</b><br>Stigma and<br>discrimination<br>(not specified)                                              | “Frontline work-<br>ers reported<br>guilt, stigma,<br>anxiety, and<br>poor sleep qual-<br>ity, which were<br>related to the<br>lack of availabil-<br>ity of adequate<br>personal protec-<br>tive equipment,<br>increased work-<br>load, and dis-<br>crimination | -                                                                                                                                                                    | Stress                                                                         | “Stigma<br>and discrimi-<br>nation against<br>the frontline<br>workers were<br>identified as<br>important fac-<br>tors contrib-<br>uting to their<br>stress.”<br><br>See extraction<br>of Chatterjee<br>et al. 2020 | + Funding stated<br>(none)<br>+ No conflict of<br>interest declared                                                          |

| General | Study                                                                                                                                                                                                                                                                                                                                                                                                                              | Population                      | Exposure | Outcome | Results<br>Stigmatization<br>as outcome:<br><br>Descriptive<br>summary (qual-<br>itative/ explora-<br>tory studies) | Results<br>Stigmatiza-<br>tion as out-<br>come:<br><br>Quantitative<br>(meta-analyti-<br>cal) results<br>(prevalence/<br>Incidence,<br>Relative Risk,<br>Odds Ratio) | Effect of stig-<br>matization on<br>health<br><br>Outcome: | Results<br>Effect of stig-<br>matization on<br>health:<br><br>Relative risk<br>(RR)/ Odds<br>Ratio (OR)/<br>or descriptive<br>summary | Strengths (+),<br>weaknesses (-),<br>confounding,<br>other bias,<br>over- or under-<br>estimation of<br>potential<br>effects |
|---------|------------------------------------------------------------------------------------------------------------------------------------------------------------------------------------------------------------------------------------------------------------------------------------------------------------------------------------------------------------------------------------------------------------------------------------|---------------------------------|----------|---------|---------------------------------------------------------------------------------------------------------------------|----------------------------------------------------------------------------------------------------------------------------------------------------------------------|------------------------------------------------------------|---------------------------------------------------------------------------------------------------------------------------------------|------------------------------------------------------------------------------------------------------------------------------|
|         | <p>atric Association Zone 16) countries,<br/>- investigated prevalence/ incidence of psychiatric disorders in general population/ frontline workers/ COVID-19 affected patients as a consequence of COVID-19 pandemic<br/>- used study population of adults age-ranged from ≥18 years, and<br/>- reported significant differences in the studied parameters</p> <p><b>Number of (all) included studies in review:</b><br/>n=13</p> | <b>Reference group:</b><br>n.a. |          |         | See extraction of #Chatterjee et al. 2020                                                                           |                                                                                                                                                                      |                                                            |                                                                                                                                       |                                                                                                                              |

| General                 | Study                                                                                                                                                                                                                                                                                                          | Population                                                                                                                                  | Exposure                                                                                                    | Outcome                                                                                                                                            | Results Stigmatization as outcome:<br><br>Descriptive summary (qualitative/ exploratory studies) | Results Stigmatization as outcome:<br><br>Quantitative (meta-analytical) results (prevalence/ Incidence, Relative Risk, Odds Ratio) | Effect of stigmatization on health<br><br>Outcome: | Results Effect of stigmatization on health:<br><br>Relative risk (RR)/ Odds Ratio (OR)/ or descriptive summary | Strengths (+), weaknesses (-), confounding, other bias, over- or under-estimation of potential effects                                                                                 |
|-------------------------|----------------------------------------------------------------------------------------------------------------------------------------------------------------------------------------------------------------------------------------------------------------------------------------------------------------|---------------------------------------------------------------------------------------------------------------------------------------------|-------------------------------------------------------------------------------------------------------------|----------------------------------------------------------------------------------------------------------------------------------------------------|--------------------------------------------------------------------------------------------------|-------------------------------------------------------------------------------------------------------------------------------------|----------------------------------------------------|----------------------------------------------------------------------------------------------------------------|----------------------------------------------------------------------------------------------------------------------------------------------------------------------------------------|
|                         | <b>Number of studies on stigmatization due to COVID-19 included:</b><br>n=1 (cross-sectional)                                                                                                                                                                                                                  |                                                                                                                                             |                                                                                                             |                                                                                                                                                    |                                                                                                  |                                                                                                                                     |                                                    |                                                                                                                |                                                                                                                                                                                        |
| #780<br>Cabarkapa, 2020 | <b>Search period:</b> 2002 – 21 August 2020<br><b>Inclusion/ criteria:</b> Original research, published in peer-reviewed journals, studies reporting mental health or psychological well-being in HCW -studies with a sample size of at least n=100<br><b>Number of (all) included studies in review:</b> n=55 | <b>Job description:</b> HCW<br><b>Inclusion criteria:</b> working in close proximity with infected patients<br><b>Reference group:</b> n.a. | Not specified<br><br>(During severe viral outbreaks (i.e. COVID-19, SARS, MERS, Ebola, and Influenza H1N1)) | Psychological impact related to working with patients with infectious viral diseases<br><br><b>Form of stigmatization</b><br>Stigma, not specified | "Stigma was a major factor"<br><br>See extraction of #759 Juan et al. 2020                       | -                                                                                                                                   | Depression                                         | "Higher risk of depressive symptoms due to stigmatization"<br><br>See extraction of #759 Juan et al. 2020      | + Funding stated (none)<br><br>Unclear risk of bias: the authors declared no conflicts of interest regarding authorship or the publication, but one author received commercial funding |

| General                 | Study                                                                                                                                                                                                                                                                                                                                                                                                       | Population                                                                                                                                                                                                                                             | Exposure                                                                                                                                                                                                                                                                                                       | Outcome                                                                                                                                                                                                                                                                                                                                                         | Results<br>Stigmatization<br>as outcome:<br><br>Descriptive<br>summary (qual-<br>itative/ explora-<br>tory studies)                                                                                                                                                  | Results<br>Stigmatiza-<br>tion as out-<br>come:<br><br>Quantitative<br>(meta-analyti-<br>cal) results<br>(prevalence/<br>Incidence,<br>Relative Risk,<br>Odds Ratio) | Effect of stig-<br>matization on<br>health<br><br>Outcome: | Results<br>Effect of stig-<br>matization on<br>health:<br><br>Relative risk<br>(RR)/ Odds<br>Ratio (OR)/<br>or descriptive<br>summary | Strengths (+),<br>weaknesses (-),<br>confounding,<br>other bias,<br>over- or under-<br>estimation of<br>potential<br>effects                                     |
|-------------------------|-------------------------------------------------------------------------------------------------------------------------------------------------------------------------------------------------------------------------------------------------------------------------------------------------------------------------------------------------------------------------------------------------------------|--------------------------------------------------------------------------------------------------------------------------------------------------------------------------------------------------------------------------------------------------------|----------------------------------------------------------------------------------------------------------------------------------------------------------------------------------------------------------------------------------------------------------------------------------------------------------------|-----------------------------------------------------------------------------------------------------------------------------------------------------------------------------------------------------------------------------------------------------------------------------------------------------------------------------------------------------------------|----------------------------------------------------------------------------------------------------------------------------------------------------------------------------------------------------------------------------------------------------------------------|----------------------------------------------------------------------------------------------------------------------------------------------------------------------|------------------------------------------------------------|---------------------------------------------------------------------------------------------------------------------------------------|------------------------------------------------------------------------------------------------------------------------------------------------------------------|
|                         | <b>Number of<br/>studies on<br/>stigmatization<br/>due to COVID-<br/>19 included:</b><br>n=1 (cross-sec-<br>tional)                                                                                                                                                                                                                                                                                         |                                                                                                                                                                                                                                                        |                                                                                                                                                                                                                                                                                                                |                                                                                                                                                                                                                                                                                                                                                                 |                                                                                                                                                                                                                                                                      |                                                                                                                                                                      |                                                            |                                                                                                                                       |                                                                                                                                                                  |
| #7283 Cal-<br>lus, 2020 | <b>Search period:</b><br>2000 until June<br>2020<br><b>Inclusion/ cri-<br/>teria:</b> empirical<br>quantitative and<br>qualitative stud-<br>ies in which re-<br>laxation tech-<br>niques of vari-<br>ous types im-<br>plemented on<br>health care pro-<br>viders caring for<br>patients during<br>severe corona-<br>virus pandem-<br>ics and articles<br>that consider<br>the implementa-<br>tion of mental | <b>Job de-<br/>scription:</b><br>Health care<br>providers <b>In-<br/>clusion cri-<br/>teria:</b> deal-<br>ing with pa-<br>tients in-<br>fected with<br>severe coro-<br>navirus<br>(SARS,<br>MERS, and<br>COVID-19)<br><b>Reference<br/>group:</b> n.a. | Stress reduction<br>technique,<br>model, or rec-<br>ommendation<br>(relaxation tech-<br>niques of vari-<br>ous types) for<br>health care pro-<br>viders dealing<br>with patients in-<br>fected with se-<br>vere corona-<br>virus (SARS,<br>MERS, and<br>COVID-19),<br>best practices<br>and interven-<br>tions | Reduction of<br>psychological<br>distress (e.g.,<br>anxiety, de-<br>pression,<br>PTSD, burn-<br>out) and men-<br>tal health out-<br>comes (addi-<br>tionally, deliv-<br>ery mecha-<br>nisms of the<br>identified inter-<br>ventions, the<br>instruments<br>used to test<br>their efficacy,<br>the determi-<br>nants of their<br>effectiveness,<br>and their im- | <b>Study by Blake<br/>et al. 2020:</b><br>- reports the de-<br>velopment and<br>evaluation of a<br>digital package,<br>which – amongst<br>others – outlines<br>the actions that<br>team leaders<br>can undertake to<br>provide a guide<br>to reduce social<br>stigma | -                                                                                                                                                                    | -                                                          | -                                                                                                                                     | + partial funding<br>from a public<br>source (Ricerca<br>Corrente funding<br>from the Italian<br>Ministry of<br>Health)<br>+ no conflict of<br>interest declared |

| General        | Study                                                                                                                                                                                                                                                  | Population                                                                                                                           | Exposure                     | Outcome                                                                                                            | Results Stigmatization as outcome:<br><br>Descriptive summary (qualitative/ exploratory studies)              | Results Stigmatization as outcome:<br><br>Quantitative (meta-analytical) results (prevalence/ Incidence, Relative Risk, Odds Ratio) | Effect of stigmatization on health<br><br>Outcome: | Results Effect of stigmatization on health:<br><br>Relative risk (RR)/ Odds Ratio (OR)/ or descriptive summary | Strengths (+), weaknesses (-), confounding, other bias, over- or under-estimation of potential effects |
|----------------|--------------------------------------------------------------------------------------------------------------------------------------------------------------------------------------------------------------------------------------------------------|--------------------------------------------------------------------------------------------------------------------------------------|------------------------------|--------------------------------------------------------------------------------------------------------------------|---------------------------------------------------------------------------------------------------------------|-------------------------------------------------------------------------------------------------------------------------------------|----------------------------------------------------|----------------------------------------------------------------------------------------------------------------|--------------------------------------------------------------------------------------------------------|
|                | health care services considered to be pertinent, such as commentaries<br><b>Number of (all) included studies in review:</b><br>n=14<br><b>Number of studies on stigmatization due to COVID-19 included:</b><br>n=1 (total)<br>n=1 (intervention study) |                                                                                                                                      |                              | pact on specific psychological variables)<br><br><b>Form of stigmatization</b><br>Stigma, not specified            |                                                                                                               |                                                                                                                                     |                                                    |                                                                                                                |                                                                                                        |
| #7274 Joo 2021 | <b>Search period:</b> until August 31 2020<br><b>Inclusion/ criteria:</b> Qualitative studies on registered nurses caring for COVID-19 patients, published in English, peer-re-                                                                        | <b>Job description:</b> registered nurses<br><b>Inclusion criteria:</b> caring for COVID-19 patients<br><b>Reference group:</b> n.a. | Caring for COVID-19 patients | Experiences/ barriers of nurses caring for COVID-19 patients<br><br><b>stigmatization</b><br>Stigma, not specified | Not reported in detail<br><br>For details see<br><br>#1033 Kackin et al. 2020<br><br>#7289 Sadati et al. 2021 | -                                                                                                                                   | -                                                  | -                                                                                                              | + Funding stated (none)<br>+ no conflict of interest declared                                          |

| General                 | Study                                                                                                                                                                                                                                                                                | Population                                                                                                                                                                                                  | Exposure                                                                                                                    | Outcome                                                                           | Results<br>Stigmatization<br>as outcome:<br><br>Descriptive<br>summary (qual-<br>itative/ explora-<br>tory studies)                                                                                  | Results<br>Stigmatiza-<br>tion as out-<br>come:<br><br>Quantitative<br>(meta-analyti-<br>cal) results<br>(prevalence/<br>Incidence,<br>Relative Risk,<br>Odds Ratio) | Effect of stig-<br>matization on<br>health<br><br>Outcome: | Results<br>Effect of stig-<br>matization on<br>health:<br><br>Relative risk<br>(RR)/ Odds<br>Ratio (OR)/<br>or descriptive<br>summary | Strengths (+),<br>weaknesses (-),<br>confounding,<br>other bias,<br>over- or under-<br>estimation of<br>potential<br>effects |
|-------------------------|--------------------------------------------------------------------------------------------------------------------------------------------------------------------------------------------------------------------------------------------------------------------------------------|-------------------------------------------------------------------------------------------------------------------------------------------------------------------------------------------------------------|-----------------------------------------------------------------------------------------------------------------------------|-----------------------------------------------------------------------------------|------------------------------------------------------------------------------------------------------------------------------------------------------------------------------------------------------|----------------------------------------------------------------------------------------------------------------------------------------------------------------------|------------------------------------------------------------|---------------------------------------------------------------------------------------------------------------------------------------|------------------------------------------------------------------------------------------------------------------------------|
|                         | viewed, pub-<br>lished/ or in<br>publication be-<br>tween January-<br>August 2020<br><b>Number of (all)<br/>included stud-<br/>ies in review:</b><br>n=9<br><b>Number of<br/>studies on<br/>stigmatization<br/>due to COVID-<br/>19 included:</b><br>n=2 (qualitative)               |                                                                                                                                                                                                             |                                                                                                                             |                                                                                   |                                                                                                                                                                                                      |                                                                                                                                                                      |                                                            |                                                                                                                                       |                                                                                                                              |
| #7278 Mul-<br>ler, 2020 | <b>Search period:</b><br>until May 11<br>2020<br><b>Inclusion/ cri-<br/>teria:</b> any type<br>of study ( quanti-<br>tative studies<br>examining prev-<br>alence of prob-<br>lems and ef-<br>fects of inter-<br>ventions as well<br>as qualitative<br>studies examin-<br>ing experi- | <b>Job de-<br/>scription:</b><br>healthcare<br>workers<br><b>Inclusion<br/>criteria:</b> any<br>type of<br>healthcare<br>worker dur-<br>ing the<br>COVID-19<br>pandemic<br><b>Reference<br/>group:</b> n.a. | - COVID-19<br>pandemic<br>- interventions<br>aimed at pre-<br>venting or re-<br>ducing negative<br>mental health<br>impacts | Mental health<br>impact<br><br><b>stigmatiza-<br/>tion</b><br>Perceived<br>stigma | “Healthcare<br>workers also re-<br>ported that they<br>were stigma-<br>tized, because<br>they were poten-<br>tial sources of<br>infection”<br><br>See extraction of<br>#7285 Mohindra<br>et al. 2020 | -                                                                                                                                                                    | -                                                          | -                                                                                                                                     | + no funding<br>+ no conflict of<br>interest declared<br>+ study protocol<br>available online                                |

| General                  | Study                                                                                                                                                                                                                                                                                                                   | Population                                                                                                         | Exposure               | Outcome                                                                                                                                                                                                              | Results<br>Stigmatization<br>as outcome:<br><br>Descriptive<br>summary (qual-<br>itative/ explora-<br>tory studies)                                                                     | Results<br>Stigmatiza-<br>tion as out-<br>come:<br><br>Quantitative<br>(meta-analyti-<br>cal) results<br>(prevalence/<br>Incidence,<br>Relative Risk,<br>Odds Ratio) | Effect of stig-<br>matization on<br>health<br><br>Outcome:        | Results<br>Effect of stig-<br>matization on<br>health:<br><br>Relative risk<br>(RR)/ Odds<br>Ratio (OR)/<br>or descriptive<br>summary                              | Strengths (+),<br>weaknesses (-),<br>confounding,<br>other bias,<br>over- or under-<br>estimation of<br>potential<br>effects |
|--------------------------|-------------------------------------------------------------------------------------------------------------------------------------------------------------------------------------------------------------------------------------------------------------------------------------------------------------------------|--------------------------------------------------------------------------------------------------------------------|------------------------|----------------------------------------------------------------------------------------------------------------------------------------------------------------------------------------------------------------------|-----------------------------------------------------------------------------------------------------------------------------------------------------------------------------------------|----------------------------------------------------------------------------------------------------------------------------------------------------------------------|-------------------------------------------------------------------|--------------------------------------------------------------------------------------------------------------------------------------------------------------------|------------------------------------------------------------------------------------------------------------------------------|
|                          | ences), no re-<br>strictions re-<br>lated to study<br>design, method-<br>ological quality,<br>or language<br><b>Number of (all)<br/>included stud-<br/>ies in review:</b><br>n=59<br><b>Number of<br/>studies on<br/>stigmatization<br/>due to COVID-<br/>19 included:</b><br>n=1 (total)<br>n=1 (cross-sec-<br>tional) |                                                                                                                    |                        |                                                                                                                                                                                                                      |                                                                                                                                                                                         |                                                                                                                                                                      |                                                                   |                                                                                                                                                                    |                                                                                                                              |
| #7275<br>Rahman,<br>2021 | <b>Search period:</b><br>December 2019<br>- July 2020<br><b>Inclusion/ cri-<br/>teria:</b> empirical<br>studies on hu-<br>man rights vio-<br>lations, social<br>stigma and dis-<br>criminatory<br>behaviors<br>against people<br>of certain ethnic                                                                      | <b>Job de-<br/>scription:</b><br>HCW<br><b>Inclusion<br/>criteria:</b><br>none<br><b>Reference<br/>group:</b> n.a. | COVID-19 pan-<br>demic | Mental dis-<br>tress and hu-<br>man rights vio-<br>lations (mobil-<br>ity rights, quar-<br>antine, and<br>lockdown,<br>shortage of<br>supplies and<br>equipment for<br>HCWs, child<br>rights, el-<br>derly's rights, | Not reported<br><br>Cross-sectional<br>study: Abdel<br>Wahed WY,<br>Hefzy EM, Ah-<br>med MI, Hamed<br>NS. Assessment<br>of Knowledge,<br>Attitudes, and<br>Perception of<br>Health Care | -                                                                                                                                                                    | Distress,<br>stress and<br>post-traumatic<br>stress symp-<br>toms | higher levels<br>of stigmatiza-<br>tion were as-<br>sociated with<br>higher levels<br>of mental dis-<br>tress, sugges-<br>tions to deal<br>with stigma<br>are made | + funding stated<br>(none)<br>+ no conflict of<br>interest declared<br><br>-no quality as-<br>sessment of<br>studies         |

| General | Study                                                                                                                                                                                                                                                                                                                                                                                                                               | Population | Exposure | Outcome                                                                                                                                 | Results<br>Stigmatization<br>as outcome:<br><br>Descriptive<br>summary (qual-<br>itative/ explora-<br>tory studies)                                                                                                                                                                                                                                                             | Results<br>Stigmatiza-<br>tion as out-<br>come:<br><br>Quantitative<br>(meta-analyti-<br>cal) results<br>(prevalence/<br>Incidence,<br>Relative Risk,<br>Odds Ratio) | Effect of stig-<br>matization on<br>health<br><br>Outcome: | Results<br>Effect of stig-<br>matization on<br>health:<br><br>Relative risk<br>(RR)/ Odds<br>Ratio (OR)/<br>or descriptive<br>summary | Strengths (+),<br>weaknesses (-),<br>confounding,<br>other bias,<br>over- or under-<br>estimation of<br>potential<br>effects |
|---------|-------------------------------------------------------------------------------------------------------------------------------------------------------------------------------------------------------------------------------------------------------------------------------------------------------------------------------------------------------------------------------------------------------------------------------------|------------|----------|-----------------------------------------------------------------------------------------------------------------------------------------|---------------------------------------------------------------------------------------------------------------------------------------------------------------------------------------------------------------------------------------------------------------------------------------------------------------------------------------------------------------------------------|----------------------------------------------------------------------------------------------------------------------------------------------------------------------|------------------------------------------------------------|---------------------------------------------------------------------------------------------------------------------------------------|------------------------------------------------------------------------------------------------------------------------------|
|         | backgrounds, HCWs, and anyone perceived to have been in contact with the virus. Mental, social, and behavioral health outcomes of the violations according to DSM/ICD classifications diagnostic categories or as ascertained using psychometric instruments. Protocols and reports including guidelines by international agencies vetted by scientific and peer reviewers which address one of the primary outcomes were included. |            |          | and disproportionate impacts on minority rights and psychiatric patients.<br><br><b>Form of stigmatization</b><br>Stigma, not specified | Workers Regarding COVID-19, A Cross-Sectional Study from Egypt. J Community Health. 2020 Dec;45(6):1242-1251. doi: 10.1007/s10900-020-00882-0. PMID: 32638199; PMCID: PMC7340762<br>Was excluded by us for the reason that HCWs were asked for their opinion/concerns/fear what might happen if getting infected with COVID-19<br><br>Qualitative study: see extraction of #910 |                                                                                                                                                                      |                                                            |                                                                                                                                       |                                                                                                                              |



| General | Study                                                                                                                                                                                                                                                              | Population | Exposure | Outcome | Results<br>Stigmatization<br>as outcome:<br><br>Descriptive<br>summary (qual-<br>itative/ explora-<br>tory studies)                                                                                                                                                                                                                                                                                      | Results<br>Stigmatiza-<br>tion as out-<br>come:<br><br>Quantitative<br>(meta-analyti-<br>cal) results<br>(prevalence/<br>Incidence,<br>Relative Risk,<br>Odds Ratio) | Effect of stig-<br>matization on<br>health<br><br>Outcome: | Results<br>Effect of stig-<br>matization on<br>health:<br><br>Relative risk<br>(RR)/ Odds<br>Ratio (OR)/<br>or descriptive<br>summary | Strengths (+),<br>weaknesses (-),<br>confounding,<br>other bias,<br>over- or under-<br>estimation of<br>potential<br>effects |
|---------|--------------------------------------------------------------------------------------------------------------------------------------------------------------------------------------------------------------------------------------------------------------------|------------|----------|---------|----------------------------------------------------------------------------------------------------------------------------------------------------------------------------------------------------------------------------------------------------------------------------------------------------------------------------------------------------------------------------------------------------------|----------------------------------------------------------------------------------------------------------------------------------------------------------------------|------------------------------------------------------------|---------------------------------------------------------------------------------------------------------------------------------------|------------------------------------------------------------------------------------------------------------------------------|
|         | <b>Number of (all) included studies in review:</b><br>n=24<br><b>Number of studies on stigmatization due to COVID-19 included:</b><br>n=6 (total),<br>working popula-<br>tion: n=3<br>(cross-sectional<br>n=1, qualitative:<br>n=1, letter-to-<br>the-editor: n=1) |            |          |         | Fawaz et al.<br>2020<br><br>Letter-to-the-editor <sup>1</sup> :<br>Chew et al.<br>(2020). Psycho-<br>logical and cop-<br>ing responses to<br>COVID-19<br>amongst resi-<br>dents in training<br>across ACGME-I<br>accredited spe-<br>cialties in Singa-<br>pore. <i>Psychiatry<br/>Research</i> , 290,<br>113146 -><br>Same results as<br>published in<br>Chew et al. 2020<br>(# 2030), see<br>extraction |                                                                                                                                                                      |                                                            |                                                                                                                                       |                                                                                                                              |

n.a. = not applicable, n.r. = not reported

<sup>1</sup> Letter-to-the-editors were excluded in our rapid scoping review. The same study was published in #2030 Chew et al. 2020
