# Supplementary material for: Stigmatization from Work-Related COVID-19 Exposure: A Systematic Review with Meta-Analysis
Source: MDPI journal article supplement (doi:10.3390/ijerph18126183), 2021-06-08
Supplement: s1 [file s1]

| General                                              | Study                                                                                                        | Population                                                                                                                                                                                                                                                                                                                                  | Exposure                                 | Outcome                                                                                                                                                                                                                                                   | Results                                                                                                                                                                                                                                                                                                                                                                                                                                                                  | Comments                                                                                                                                                                  |                 |                                       |              |              |         |                                                                                                                                                                             |
|------------------------------------------------------|--------------------------------------------------------------------------------------------------------------|---------------------------------------------------------------------------------------------------------------------------------------------------------------------------------------------------------------------------------------------------------------------------------------------------------------------------------------------|------------------------------------------|-----------------------------------------------------------------------------------------------------------------------------------------------------------------------------------------------------------------------------------------------------------|--------------------------------------------------------------------------------------------------------------------------------------------------------------------------------------------------------------------------------------------------------------------------------------------------------------------------------------------------------------------------------------------------------------------------------------------------------------------------|---------------------------------------------------------------------------------------------------------------------------------------------------------------------------|-----------------|---------------------------------------|--------------|--------------|---------|-----------------------------------------------------------------------------------------------------------------------------------------------------------------------------|
| #<br>First Author, Year, Country<br><br>Risk of bias | Study design:<br>Time of Study:<br>Follow-up mean, range:                                                    | Job description:<br>Inclusion criteria:<br># invited:<br># baseline:<br># follow -up: Age at baseline:<br>F : M at baseline:<br>Response:<br>Loss-to-follow-up:                                                                                                                                                                             | Describe how exposure was measured       | Describe how outcome was measured<br><br>Form of stigmatization:                                                                                                                                                                                          | Prevalence of stigmatization:<br><br>Conditions increasing work-related stigmatization:<br><br>Measures to prevent/ deal with stigmatization at work:<br><br>Unfavourable health consequences associated with stigmatization:<br><br>Stigmatization studied in association with return-to-work:                                                                                                                                                                          |                                                                                                                                                                           |                 |                                       |              |              |         |                                                                                                                                                                             |
| 7288<br>Chatterjee, 2020, India<br><br>High risk     | Study design:<br>Cross-sectional<br>Time of Study:<br>28 March - 6 April 2020<br>Follow-up mean, range: n.a. | Job description:<br>Doctors<br>Inclusion criteria:<br>none<br># invited: n.a. convenience sample -> link shared via Email, WhatsApp and other social media<br># baseline: n=152<br># follow -up: n.a.<br>Age at baseline:<br>42.1 (SD ±12.2) years<br>% females:<br>21.7%<br>Response: n.a. (convenience sample)<br>Loss-to-follow-up: n.a. | During COVID-19 pandemic (not specified) | One question: Have you been ostracized? (yes, no)<br><br>Form of stigmatization:<br>Self-stigma (perceived):<br>social exclusion<br>“ostracized by friends, neighbor, and the society for working in the hospital for being exposed and spreading others“ | Prevalence of stigmatization:<br>Yes: n=32 (21.1%)<br>No: n=120 (78.9%)<br><br>Conditions increasing work-related stigmatization: was not investigated<br><br>Measures to prevent/ deal with stigmatization at work: was not investigated<br><br>Unfavourable health consequences associated with stigmatization: Depression, anxiety, and stress<br>Results are shown in Tab. 2.<br><br>Stigmatization studied in association with return-to-work: was not investigated | + no conflict of interest<br>+ funding stated (none)<br><br>- recruitment procedure: convenience sample<br>-outcome: 1 item<br>- analysis method<br>- no ethical approval |                 |                                       |              |              |         |                                                                                                                                                                             |
| 2040<br>Chaudhary, 2020, Pakistan<br><br>High risk   | Study design:<br>Cross-sectional<br>Time of Study:<br>March - June 2020                                      | Job description:<br>Clinical Oral HCWs (dentists and dental assistants/ hygienists) (n=392), Non-clinical oral HCWs (dental laboratory                                                                                                                                                                                                      | During COVID-19 pandemic (not specified) | Questionnaire with 4 items concerning stigmatization (1=strongly disagree to 6=strongly agree), dichotomized as “agree” (= strongly agree, agree, and probably agree) and “disagree” (= strongly                                                          | Prevalence of stigmatization:<br><br>Self-stigma (anticipated):<br>Table 4: Perceived impact on personal life and work <table><tr><td>Perceveid impact (agree)</td><td>Clinical, N (%)</td><td>Non-clinical (Reference group), N (%)</td><td>Total, N (%)</td><td>Adjusted OR*</td><td>p-value</td></tr></table>                                                                                                                                                         | Perceveid impact (agree)                                                                                                                                                  | Clinical, N (%) | Non-clinical (Reference group), N (%) | Total, N (%) | Adjusted OR* | p-value | + ethical approval for the study protocol was obtained from the Dental College, HITEC Institute of Medical Sciences<br>+ outcome: use of a valid and reliable questionnaire |
| Perceveid impact (agree)                             | Clinical, N (%)                                                                                              | Non-clinical (Reference group), N (%)                                                                                                                                                                                                                                                                                                       | Total, N (%)                             | Adjusted OR*                                                                                                                                                                                                                                              | p-value                                                                                                                                                                                                                                                                                                                                                                                                                                                                  |                                                                                                                                                                           |                 |                                       |              |              |         |                                                                                                                                                                             |

| General | Study                       | Population                                                                                                                                                                                                                                                                                                                                                                                                                                                                                                                                                                                                       | Exposure | Outcome                                                                                                                                                                                                                                                                                                                                                                                                                 | Results                                                                                                                                           |                 |                                       |              |                  |         | Comments                                                                                                                                                                                                                                                                                                                                                                                                                                                                                                |
|---------|-----------------------------|------------------------------------------------------------------------------------------------------------------------------------------------------------------------------------------------------------------------------------------------------------------------------------------------------------------------------------------------------------------------------------------------------------------------------------------------------------------------------------------------------------------------------------------------------------------------------------------------------------------|----------|-------------------------------------------------------------------------------------------------------------------------------------------------------------------------------------------------------------------------------------------------------------------------------------------------------------------------------------------------------------------------------------------------------------------------|---------------------------------------------------------------------------------------------------------------------------------------------------|-----------------|---------------------------------------|--------------|------------------|---------|---------------------------------------------------------------------------------------------------------------------------------------------------------------------------------------------------------------------------------------------------------------------------------------------------------------------------------------------------------------------------------------------------------------------------------------------------------------------------------------------------------|
|         | Follow-up mean, range: n.a. | technicians, attendants/ cleaners, managerial/ clerical services) (n=191) from 10 different dental hospitals<br><b>Inclusion criteria:</b> none<br><b># invited:</b> n.r.<br><b># baseline:</b> n=583<br><b># follow -up:</b> n.a.<br><b>Age at baseline:</b> 20-29 years: n=124 (31.6%, clinical), n=51 (26.7%, non-clinical), 30-39: 120 (30.6% clinical), 69 (36.1% non-clinical), 40-49: 98 (25.0, clinical), 46 (24.0% non-clinical), 50-60: 50 (12.7% clinical), 25 (13.0% non-clinical)<br><b>% females:</b> 54.8% clinical 22.5% non-clinical<br><b>Response:</b> n.r.<br><b>Loss-to-follow-up:</b> n.a. |          | disagree, disagree, and probably disagree)<br><br><b>Form of stigmatization: Self-stigma (anticipated):</b><br>"I would be afraid of telling my family/ friends about the risk I am exposed", "I would avoid telling other people about the nature of my job", "People would avoid me because of my job"<br><br><b>Associative Stigma: social exclusion</b><br>"People would avoid my family members because of my job" | I would be afraid of telling my family/ friends about the risk I am exposed<br>336 (85.7)<br>134 (70.2)<br>470 (80.6)<br>2.55 (1.67-3.88)<br>.001 |                 |                                       |              |                  |         | modified and adopted for the COVID-19 pandemic, stigmatization measured with 4 questions, usage and validation of an adopted translated Urdu questionnaire to assess concerns, perceived impact, and preparedness of OHCWs in the COVID-19 pandemic (Cronbach's $\alpha$ 0.81=satisfactory)<br>+ Funding stated (none)<br>+ confounding<br>+ analysis method<br><br>- recruitment procedure: no detailed information on the recruitment procedure (# invited not reported)<br>- response rate not shown |
|         |                             |                                                                                                                                                                                                                                                                                                                                                                                                                                                                                                                                                                                                                  |          |                                                                                                                                                                                                                                                                                                                                                                                                                         | People would avoid me because of my job<br>351 (89.5)<br>139 (72.8)<br>490 (84.0)<br>3.20 (2.03-5.04)<br>.001                                     |                 |                                       |              |                  |         |                                                                                                                                                                                                                                                                                                                                                                                                                                                                                                         |
|         |                             |                                                                                                                                                                                                                                                                                                                                                                                                                                                                                                                                                                                                                  |          |                                                                                                                                                                                                                                                                                                                                                                                                                         | I would avoid telling other people about the nature of my job<br>347 (88.5)<br>135 (70.7)<br>482 (82.7)<br>3.19 (2.06-4.96)<br>.001               |                 |                                       |              |                  |         |                                                                                                                                                                                                                                                                                                                                                                                                                                                                                                         |
|         |                             |                                                                                                                                                                                                                                                                                                                                                                                                                                                                                                                                                                                                                  |          |                                                                                                                                                                                                                                                                                                                                                                                                                         | *Adjusted for age, gender, marital status, place of work, staying with family/friends.                                                            |                 |                                       |              |                  |         |                                                                                                                                                                                                                                                                                                                                                                                                                                                                                                         |
|         |                             |                                                                                                                                                                                                                                                                                                                                                                                                                                                                                                                                                                                                                  |          |                                                                                                                                                                                                                                                                                                                                                                                                                         | <b>Associative Stigma (social exclusion):</b><br>Table 4: Perceived impact on personal life and work                                              |                 |                                       |              |                  |         |                                                                                                                                                                                                                                                                                                                                                                                                                                                                                                         |
|         |                             |                                                                                                                                                                                                                                                                                                                                                                                                                                                                                                                                                                                                                  |          |                                                                                                                                                                                                                                                                                                                                                                                                                         | Perceived impact (agree)                                                                                                                          | Clinical, N (%) | Non-clinical (Reference group), N (%) | Total, N (%) | Adjusted OR*     | p-value |                                                                                                                                                                                                                                                                                                                                                                                                                                                                                                         |
|         |                             |                                                                                                                                                                                                                                                                                                                                                                                                                                                                                                                                                                                                                  |          |                                                                                                                                                                                                                                                                                                                                                                                                                         | People would avoid my family members because of my job                                                                                            | 336 (85.7)      | 129 (67.5)                            | 465 (79.8)   | 2.88 (1.90-4.36) | .001    |                                                                                                                                                                                                                                                                                                                                                                                                                                                                                                         |
|         |                             |                                                                                                                                                                                                                                                                                                                                                                                                                                                                                                                                                                                                                  |          |                                                                                                                                                                                                                                                                                                                                                                                                                         | *Adjusted for age, gender, marital status, place of work, staying with family/friends.                                                            |                 |                                       |              |                  |         |                                                                                                                                                                                                                                                                                                                                                                                                                                                                                                         |

| General                                   | Study                                                                                                                                                                                                                                                       | Population                                                                                                                                                                                                                                                                                                                                                                                                                                                                                                                                                | Exposure                                                                                                                                                   | Outcome                                                                                                                                                                                                                                                                                                                                      | Results                                                                                                                                                                                                                                                                                                                                                                                                                                                                                                                                                                                                                                                                                                                                                                                                                                                                                                                                                                                                                                                                                                                                                                                                                                                                                                                                         | Comments |        |  |        |  |     |   |           |   |           |            |      |       |      |       |             |      |  |      |  |            |      |  |      |  |     |  |  |  |  |      |      |      |      |      |        |      |  |      |  |           |  |  |  |  |               |      |       |      |      |           |      |  |      |  |     |  |  |  |  |                 |      |      |      |       |        |      |  |      |  |                                                                                                                                                                                                                                                                                                                                                                                             |
|-------------------------------------------|-------------------------------------------------------------------------------------------------------------------------------------------------------------------------------------------------------------------------------------------------------------|-----------------------------------------------------------------------------------------------------------------------------------------------------------------------------------------------------------------------------------------------------------------------------------------------------------------------------------------------------------------------------------------------------------------------------------------------------------------------------------------------------------------------------------------------------------|------------------------------------------------------------------------------------------------------------------------------------------------------------|----------------------------------------------------------------------------------------------------------------------------------------------------------------------------------------------------------------------------------------------------------------------------------------------------------------------------------------------|-------------------------------------------------------------------------------------------------------------------------------------------------------------------------------------------------------------------------------------------------------------------------------------------------------------------------------------------------------------------------------------------------------------------------------------------------------------------------------------------------------------------------------------------------------------------------------------------------------------------------------------------------------------------------------------------------------------------------------------------------------------------------------------------------------------------------------------------------------------------------------------------------------------------------------------------------------------------------------------------------------------------------------------------------------------------------------------------------------------------------------------------------------------------------------------------------------------------------------------------------------------------------------------------------------------------------------------------------|----------|--------|--|--------|--|-----|---|-----------|---|-----------|------------|------|-------|------|-------|-------------|------|--|------|--|------------|------|--|------|--|-----|--|--|--|--|------|------|------|------|------|--------|------|--|------|--|-----------|--|--|--|--|---------------|------|-------|------|------|-----------|------|--|------|--|-----|--|--|--|--|-----------------|------|------|------|-------|--------|------|--|------|--|---------------------------------------------------------------------------------------------------------------------------------------------------------------------------------------------------------------------------------------------------------------------------------------------------------------------------------------------------------------------------------------------|
|                                           |                                                                                                                                                                                                                                                             |                                                                                                                                                                                                                                                                                                                                                                                                                                                                                                                                                           |                                                                                                                                                            |                                                                                                                                                                                                                                                                                                                                              | <p><b>Conditions increasing work-related stigmatization:</b> was not investigated</p> <p><b>Measures to prevent/ deal with stigmatization at work:</b> was not investigated</p> <p><b>Unfavourable health consequences associated with stigmatization:</b> was not investigated</p> <p><b>Stigmatization studied in association with return-to-work:</b> was not investigated</p>                                                                                                                                                                                                                                                                                                                                                                                                                                                                                                                                                                                                                                                                                                                                                                                                                                                                                                                                                               |          |        |  |        |  |     |   |           |   |           |            |      |       |      |       |             |      |  |      |  |            |      |  |      |  |     |  |  |  |  |      |      |      |      |      |        |      |  |      |  |           |  |  |  |  |               |      |       |      |      |           |      |  |      |  |     |  |  |  |  |                 |      |      |      |       |        |      |  |      |  |                                                                                                                                                                                                                                                                                                                                                                                             |
| 761<br>Chen, 2020, China<br><br>High risk | <p><b>Study design:</b> Longitudinal name: “Public attitude towards the novel coronavirus pandemic in Hubei”</p> <p><b>Time of Study:</b> Baseline: 2 - 8 Feb 2020<br/>Follow-up: 23 March - 9 April 2020</p> <p><b>Follow-up mean, range:</b> 2 months</p> | <p><b>Job description:</b> Government/ public institution/ institutions/state-owned Enterprises (SOE): 32.9%<br/>Private enterprise staff or individual business: 53.2%<br/>No work or refuse to disclose: 13.8%</p> <p><b>Inclusion criteria:</b> none</p> <p><b># invited:</b> n. r.</p> <p><b># baseline:</b> n=5239</p> <p><b># follow-up:</b> n=2054 -&gt; final sample: n=1902</p> <p><b>Age at baseline:</b> Mean 33.5 (SD ± 12.5) years</p> <p><b>% of females:</b> 43.9%</p> <p><b>Response:</b> n.r.</p> <p><b>Loss-to-follow-up:</b> 60.1%</p> | COVID-19; Baseline: rapid increase in COVID-19 cases and related deaths; Follow-up: authorities relaxed lockdown on 23 March; officially lifted in 8 April | <p>Perceived discrimination: one item whether they had encountered discrimination because of the COVID-19 pandemic (dichotomized: yes/ no), not validated</p> <p><b>Form of stigmatization:</b><br/><u>Self-stigma (perceived): discrimination</u><br/>”...whether they had encountered discrimination because of the COVID-19 pandemic“</p> | <p><b>Prevalence of stigmatization:</b></p> <p><u>Self-stigma (perceived):</u><br/>Baseline: 45%<br/>Follow-up: 43%</p> <p>Tab. 2: Responses toward COVID-19 (“Perceived discrimination”)</p> <table><tr><th></th><th colspan="2">Wave 1</th><th colspan="2">Wave 2</th></tr><tr><th>Age</th><th>%</th><th>Chi² test</th><th>%</th><th>Chi² test</th></tr><tr><td>≤ 25 years</td><td>51.6</td><td>23.12</td><td>47.8</td><td>11.39</td></tr><tr><td>26-45 years</td><td>42.9</td><td></td><td>41.7</td><td></td></tr><tr><td>≥ 46 years</td><td>35.1</td><td></td><td>36.4</td><td></td></tr><tr><th>Sex</th><td></td><td></td><td></td><td></td></tr><tr><td>Male</td><td>50.0</td><td>5.56</td><td>44.2</td><td>1.57</td></tr><tr><td>Female</td><td>38.1</td><td></td><td>40.6</td><td></td></tr><tr><th>Education</th><td></td><td></td><td></td><td></td></tr><tr><td>≤ High school</td><td>42.6</td><td>-1.41</td><td>43.7</td><td>0.85</td></tr><tr><td>≥ College</td><td>45.9</td><td></td><td>41.8</td><td></td></tr><tr><th>Job</th><td></td><td></td><td></td><td></td></tr><tr><td>Government/ SOE</td><td>48.1</td><td>2.22</td><td>39.0</td><td>-2.05</td></tr><tr><td>Others</td><td>42.1</td><td></td><td>44.5</td><td></td></tr></table> <p><b>Conditions increasing work-related stigmatization:</b> was not investigated</p> |          | Wave 1 |  | Wave 2 |  | Age | % | Chi² test | % | Chi² test | ≤ 25 years | 51.6 | 23.12 | 47.8 | 11.39 | 26-45 years | 42.9 |  | 41.7 |  | ≥ 46 years | 35.1 |  | 36.4 |  | Sex |  |  |  |  | Male | 50.0 | 5.56 | 44.2 | 1.57 | Female | 38.1 |  | 40.6 |  | Education |  |  |  |  | ≤ High school | 42.6 | -1.41 | 43.7 | 0.85 | ≥ College | 45.9 |  | 41.8 |  | Job |  |  |  |  | Government/ SOE | 48.1 | 2.22 | 39.0 | -2.05 | Others | 42.1 |  | 44.5 |  | <p>+ ethical approval from the ethics committee of the Chinese Academy of Social Sciences (CHN-2153, 18/0020)</p> <p>+ no conflict of interest</p> <p>+ chronology: follow-up</p> <p>- recruitment procedure: no description of recruitment (# of invited not reported)</p> <p>- outcome: only one item to measure stigmatization</p> <p>- analysis method:</p> <p>- funding not stated</p> |
|                                           | Wave 1                                                                                                                                                                                                                                                      |                                                                                                                                                                                                                                                                                                                                                                                                                                                                                                                                                           | Wave 2                                                                                                                                                     |                                                                                                                                                                                                                                                                                                                                              |                                                                                                                                                                                                                                                                                                                                                                                                                                                                                                                                                                                                                                                                                                                                                                                                                                                                                                                                                                                                                                                                                                                                                                                                                                                                                                                                                 |          |        |  |        |  |     |   |           |   |           |            |      |       |      |       |             |      |  |      |  |            |      |  |      |  |     |  |  |  |  |      |      |      |      |      |        |      |  |      |  |           |  |  |  |  |               |      |       |      |      |           |      |  |      |  |     |  |  |  |  |                 |      |      |      |       |        |      |  |      |  |                                                                                                                                                                                                                                                                                                                                                                                             |
| Age                                       | %                                                                                                                                                                                                                                                           | Chi² test                                                                                                                                                                                                                                                                                                                                                                                                                                                                                                                                                 | %                                                                                                                                                          | Chi² test                                                                                                                                                                                                                                                                                                                                    |                                                                                                                                                                                                                                                                                                                                                                                                                                                                                                                                                                                                                                                                                                                                                                                                                                                                                                                                                                                                                                                                                                                                                                                                                                                                                                                                                 |          |        |  |        |  |     |   |           |   |           |            |      |       |      |       |             |      |  |      |  |            |      |  |      |  |     |  |  |  |  |      |      |      |      |      |        |      |  |      |  |           |  |  |  |  |               |      |       |      |      |           |      |  |      |  |     |  |  |  |  |                 |      |      |      |       |        |      |  |      |  |                                                                                                                                                                                                                                                                                                                                                                                             |
| ≤ 25 years                                | 51.6                                                                                                                                                                                                                                                        | 23.12                                                                                                                                                                                                                                                                                                                                                                                                                                                                                                                                                     | 47.8                                                                                                                                                       | 11.39                                                                                                                                                                                                                                                                                                                                        |                                                                                                                                                                                                                                                                                                                                                                                                                                                                                                                                                                                                                                                                                                                                                                                                                                                                                                                                                                                                                                                                                                                                                                                                                                                                                                                                                 |          |        |  |        |  |     |   |           |   |           |            |      |       |      |       |             |      |  |      |  |            |      |  |      |  |     |  |  |  |  |      |      |      |      |      |        |      |  |      |  |           |  |  |  |  |               |      |       |      |      |           |      |  |      |  |     |  |  |  |  |                 |      |      |      |       |        |      |  |      |  |                                                                                                                                                                                                                                                                                                                                                                                             |
| 26-45 years                               | 42.9                                                                                                                                                                                                                                                        |                                                                                                                                                                                                                                                                                                                                                                                                                                                                                                                                                           | 41.7                                                                                                                                                       |                                                                                                                                                                                                                                                                                                                                              |                                                                                                                                                                                                                                                                                                                                                                                                                                                                                                                                                                                                                                                                                                                                                                                                                                                                                                                                                                                                                                                                                                                                                                                                                                                                                                                                                 |          |        |  |        |  |     |   |           |   |           |            |      |       |      |       |             |      |  |      |  |            |      |  |      |  |     |  |  |  |  |      |      |      |      |      |        |      |  |      |  |           |  |  |  |  |               |      |       |      |      |           |      |  |      |  |     |  |  |  |  |                 |      |      |      |       |        |      |  |      |  |                                                                                                                                                                                                                                                                                                                                                                                             |
| ≥ 46 years                                | 35.1                                                                                                                                                                                                                                                        |                                                                                                                                                                                                                                                                                                                                                                                                                                                                                                                                                           | 36.4                                                                                                                                                       |                                                                                                                                                                                                                                                                                                                                              |                                                                                                                                                                                                                                                                                                                                                                                                                                                                                                                                                                                                                                                                                                                                                                                                                                                                                                                                                                                                                                                                                                                                                                                                                                                                                                                                                 |          |        |  |        |  |     |   |           |   |           |            |      |       |      |       |             |      |  |      |  |            |      |  |      |  |     |  |  |  |  |      |      |      |      |      |        |      |  |      |  |           |  |  |  |  |               |      |       |      |      |           |      |  |      |  |     |  |  |  |  |                 |      |      |      |       |        |      |  |      |  |                                                                                                                                                                                                                                                                                                                                                                                             |
| Sex                                       |                                                                                                                                                                                                                                                             |                                                                                                                                                                                                                                                                                                                                                                                                                                                                                                                                                           |                                                                                                                                                            |                                                                                                                                                                                                                                                                                                                                              |                                                                                                                                                                                                                                                                                                                                                                                                                                                                                                                                                                                                                                                                                                                                                                                                                                                                                                                                                                                                                                                                                                                                                                                                                                                                                                                                                 |          |        |  |        |  |     |   |           |   |           |            |      |       |      |       |             |      |  |      |  |            |      |  |      |  |     |  |  |  |  |      |      |      |      |      |        |      |  |      |  |           |  |  |  |  |               |      |       |      |      |           |      |  |      |  |     |  |  |  |  |                 |      |      |      |       |        |      |  |      |  |                                                                                                                                                                                                                                                                                                                                                                                             |
| Male                                      | 50.0                                                                                                                                                                                                                                                        | 5.56                                                                                                                                                                                                                                                                                                                                                                                                                                                                                                                                                      | 44.2                                                                                                                                                       | 1.57                                                                                                                                                                                                                                                                                                                                         |                                                                                                                                                                                                                                                                                                                                                                                                                                                                                                                                                                                                                                                                                                                                                                                                                                                                                                                                                                                                                                                                                                                                                                                                                                                                                                                                                 |          |        |  |        |  |     |   |           |   |           |            |      |       |      |       |             |      |  |      |  |            |      |  |      |  |     |  |  |  |  |      |      |      |      |      |        |      |  |      |  |           |  |  |  |  |               |      |       |      |      |           |      |  |      |  |     |  |  |  |  |                 |      |      |      |       |        |      |  |      |  |                                                                                                                                                                                                                                                                                                                                                                                             |
| Female                                    | 38.1                                                                                                                                                                                                                                                        |                                                                                                                                                                                                                                                                                                                                                                                                                                                                                                                                                           | 40.6                                                                                                                                                       |                                                                                                                                                                                                                                                                                                                                              |                                                                                                                                                                                                                                                                                                                                                                                                                                                                                                                                                                                                                                                                                                                                                                                                                                                                                                                                                                                                                                                                                                                                                                                                                                                                                                                                                 |          |        |  |        |  |     |   |           |   |           |            |      |       |      |       |             |      |  |      |  |            |      |  |      |  |     |  |  |  |  |      |      |      |      |      |        |      |  |      |  |           |  |  |  |  |               |      |       |      |      |           |      |  |      |  |     |  |  |  |  |                 |      |      |      |       |        |      |  |      |  |                                                                                                                                                                                                                                                                                                                                                                                             |
| Education                                 |                                                                                                                                                                                                                                                             |                                                                                                                                                                                                                                                                                                                                                                                                                                                                                                                                                           |                                                                                                                                                            |                                                                                                                                                                                                                                                                                                                                              |                                                                                                                                                                                                                                                                                                                                                                                                                                                                                                                                                                                                                                                                                                                                                                                                                                                                                                                                                                                                                                                                                                                                                                                                                                                                                                                                                 |          |        |  |        |  |     |   |           |   |           |            |      |       |      |       |             |      |  |      |  |            |      |  |      |  |     |  |  |  |  |      |      |      |      |      |        |      |  |      |  |           |  |  |  |  |               |      |       |      |      |           |      |  |      |  |     |  |  |  |  |                 |      |      |      |       |        |      |  |      |  |                                                                                                                                                                                                                                                                                                                                                                                             |
| ≤ High school                             | 42.6                                                                                                                                                                                                                                                        | -1.41                                                                                                                                                                                                                                                                                                                                                                                                                                                                                                                                                     | 43.7                                                                                                                                                       | 0.85                                                                                                                                                                                                                                                                                                                                         |                                                                                                                                                                                                                                                                                                                                                                                                                                                                                                                                                                                                                                                                                                                                                                                                                                                                                                                                                                                                                                                                                                                                                                                                                                                                                                                                                 |          |        |  |        |  |     |   |           |   |           |            |      |       |      |       |             |      |  |      |  |            |      |  |      |  |     |  |  |  |  |      |      |      |      |      |        |      |  |      |  |           |  |  |  |  |               |      |       |      |      |           |      |  |      |  |     |  |  |  |  |                 |      |      |      |       |        |      |  |      |  |                                                                                                                                                                                                                                                                                                                                                                                             |
| ≥ College                                 | 45.9                                                                                                                                                                                                                                                        |                                                                                                                                                                                                                                                                                                                                                                                                                                                                                                                                                           | 41.8                                                                                                                                                       |                                                                                                                                                                                                                                                                                                                                              |                                                                                                                                                                                                                                                                                                                                                                                                                                                                                                                                                                                                                                                                                                                                                                                                                                                                                                                                                                                                                                                                                                                                                                                                                                                                                                                                                 |          |        |  |        |  |     |   |           |   |           |            |      |       |      |       |             |      |  |      |  |            |      |  |      |  |     |  |  |  |  |      |      |      |      |      |        |      |  |      |  |           |  |  |  |  |               |      |       |      |      |           |      |  |      |  |     |  |  |  |  |                 |      |      |      |       |        |      |  |      |  |                                                                                                                                                                                                                                                                                                                                                                                             |
| Job                                       |                                                                                                                                                                                                                                                             |                                                                                                                                                                                                                                                                                                                                                                                                                                                                                                                                                           |                                                                                                                                                            |                                                                                                                                                                                                                                                                                                                                              |                                                                                                                                                                                                                                                                                                                                                                                                                                                                                                                                                                                                                                                                                                                                                                                                                                                                                                                                                                                                                                                                                                                                                                                                                                                                                                                                                 |          |        |  |        |  |     |   |           |   |           |            |      |       |      |       |             |      |  |      |  |            |      |  |      |  |     |  |  |  |  |      |      |      |      |      |        |      |  |      |  |           |  |  |  |  |               |      |       |      |      |           |      |  |      |  |     |  |  |  |  |                 |      |      |      |       |        |      |  |      |  |                                                                                                                                                                                                                                                                                                                                                                                             |
| Government/ SOE                           | 48.1                                                                                                                                                                                                                                                        | 2.22                                                                                                                                                                                                                                                                                                                                                                                                                                                                                                                                                      | 39.0                                                                                                                                                       | -2.05                                                                                                                                                                                                                                                                                                                                        |                                                                                                                                                                                                                                                                                                                                                                                                                                                                                                                                                                                                                                                                                                                                                                                                                                                                                                                                                                                                                                                                                                                                                                                                                                                                                                                                                 |          |        |  |        |  |     |   |           |   |           |            |      |       |      |       |             |      |  |      |  |            |      |  |      |  |     |  |  |  |  |      |      |      |      |      |        |      |  |      |  |           |  |  |  |  |               |      |       |      |      |           |      |  |      |  |     |  |  |  |  |                 |      |      |      |       |        |      |  |      |  |                                                                                                                                                                                                                                                                                                                                                                                             |
| Others                                    | 42.1                                                                                                                                                                                                                                                        |                                                                                                                                                                                                                                                                                                                                                                                                                                                                                                                                                           | 44.5                                                                                                                                                       |                                                                                                                                                                                                                                                                                                                                              |                                                                                                                                                                                                                                                                                                                                                                                                                                                                                                                                                                                                                                                                                                                                                                                                                                                                                                                                                                                                                                                                                                                                                                                                                                                                                                                                                 |          |        |  |        |  |     |   |           |   |           |            |      |       |      |       |             |      |  |      |  |            |      |  |      |  |     |  |  |  |  |      |      |      |      |      |        |      |  |      |  |           |  |  |  |  |               |      |       |      |      |           |      |  |      |  |     |  |  |  |  |                 |      |      |      |       |        |      |  |      |  |                                                                                                                                                                                                                                                                                                                                                                                             |

| General                                              | Study                                                                                                                                                                             | Population                                                                                                                                                                                                                                                                                                                                                                                                                                                                                | Exposure                                 | Outcome                                                                                                                                                                                                                                                                                                                                                                                                                                                                                                                                                                                                                                                           | Results                                                                                                                                                                                                                                                                                                                                                                                                                                                                                                                                                                                                                                                                                                                                                                                                                                                                                                                                                                                                                                                                                                                                   | Comments |                    |                     |          |                                   |            |            |      |                                               |            |            |      |                                   |            |            |      |  |                    |                     |          |                                   |           |           |      |  |                    |                     |          |                                                                                                                                                                                                                                                                                                                                                                                          |
|------------------------------------------------------|-----------------------------------------------------------------------------------------------------------------------------------------------------------------------------------|-------------------------------------------------------------------------------------------------------------------------------------------------------------------------------------------------------------------------------------------------------------------------------------------------------------------------------------------------------------------------------------------------------------------------------------------------------------------------------------------|------------------------------------------|-------------------------------------------------------------------------------------------------------------------------------------------------------------------------------------------------------------------------------------------------------------------------------------------------------------------------------------------------------------------------------------------------------------------------------------------------------------------------------------------------------------------------------------------------------------------------------------------------------------------------------------------------------------------|-------------------------------------------------------------------------------------------------------------------------------------------------------------------------------------------------------------------------------------------------------------------------------------------------------------------------------------------------------------------------------------------------------------------------------------------------------------------------------------------------------------------------------------------------------------------------------------------------------------------------------------------------------------------------------------------------------------------------------------------------------------------------------------------------------------------------------------------------------------------------------------------------------------------------------------------------------------------------------------------------------------------------------------------------------------------------------------------------------------------------------------------|----------|--------------------|---------------------|----------|-----------------------------------|------------|------------|------|-----------------------------------------------|------------|------------|------|-----------------------------------|------------|------------|------|--|--------------------|---------------------|----------|-----------------------------------|-----------|-----------|------|--|--------------------|---------------------|----------|------------------------------------------------------------------------------------------------------------------------------------------------------------------------------------------------------------------------------------------------------------------------------------------------------------------------------------------------------------------------------------------|
|                                                      |                                                                                                                                                                                   |                                                                                                                                                                                                                                                                                                                                                                                                                                                                                           |                                          |                                                                                                                                                                                                                                                                                                                                                                                                                                                                                                                                                                                                                                                                   | <b>Measures to prevent/ deal with stigmatization at work:</b> was not investigated<br><br><b>Unfavourable health consequences associated with stigmatization:</b> was not investigated<br><br><b>Stigmatization studied in association with return-to-work:</b> was not investigated                                                                                                                                                                                                                                                                                                                                                                                                                                                                                                                                                                                                                                                                                                                                                                                                                                                      |          |                    |                     |          |                                   |            |            |      |                                               |            |            |      |                                   |            |            |      |  |                    |                     |          |                                   |           |           |      |  |                    |                     |          |                                                                                                                                                                                                                                                                                                                                                                                          |
| 2030<br>Chew,<br>2020,<br>Singapore<br><br>High risk | <b>Study design:</b><br>Longitudinal<br><b>Time of Study:</b><br>Baseline: 5 March - 10 April 2020<br>Follow up: 8 June - 2 July 2020<br><b>Follow-up mean, range:</b> 3-4 months | <b>Job description:</b><br>2 groups of medical residents in training:<br>Medical: Medical specialties, Radiology,Family medicine, Psychiatry;<br>Surgical: Surgery, Anaesthesia, Emergency medicine<br><b>Inclusion criteria:</b><br>none<br><b># invited:</b> n=557 (all residents)<br><b># baseline:</b> n=274<br><b># follow -up:</b> n=221<br><b>Age at baseline:</b> 30.6 (SD ±2.7) years<br><b>% of females:</b> 51.5%<br><b>Response:</b> 49.2%<br><b>Loss-to-follow-up:</b> 19.3% | During COVID-19 pandemic (not specified) | Healthcare Workers Stigma Scale (HWSS), 12 items, 4-point Likert scale (1 =strongly disagree, 4= strongly agree)<br><br>4 subscales:<br>1. Self-stigma ( <i>Personalized stigma</i> )<br>2. Disclosure concerns<br>3. Concerns about public attitudes<br>4. Negative self-image<br><br><b>Form of stigmatization:</b><br><u>Self-stigma (internalized):</u> negative self-image (feeling inferior to others due to occupation)<br><u>Self-stigma (anticipated):</u> own perceived consequences, fear of rejection, disclosure concerns (control the information or keeping occupation a secret), concerns about public attitudes (what most people think of HCWs) | <b>Prevalence of stigmatization:</b><br><br><u>Self-stigma (internalized):</u><br>Table 1: Demographic and clinical variables of <u>all residents</u> (baseline vs. follow-up) <table><tr><td></td><td>Baseline (mean SD)</td><td>Follow-up (mean SD)</td><td>t-test t</td></tr><tr><td>HWSS Disclosure Concerns subscale</td><td>6.3 (2.29)</td><td>5.8 (2.37)</td><td>2.15</td></tr><tr><td>HWSS Concerns about Public Attitudes subscale</td><td>6.6 (2.28)</td><td>6.0 (2.26)</td><td>3.08</td></tr><tr><td>HWSS Negative Self-image subscale</td><td>4.5 (1.90)</td><td>4.2 (1.71)</td><td>1.72</td></tr></table><br><u>Self-stigma (anticipated):</u><br>Table 1: Demographic and clinical variables of <u>all residents</u> (baseline vs. follow-up) <table><tr><td></td><td>Baseline (mean SD)</td><td>Follow-up (mean SD)</td><td>t-test t</td></tr><tr><td>HWSS Personalized Stigma subscale</td><td>5.1 (1.7)</td><td>4.8 (1.7)</td><td>1.68</td></tr></table><br><u>Self-stigma (internalized and anticipated):</u> <table><tr><td></td><td>Baseline (mean SD)</td><td>Follow-up (mean SD)</td><td>t-test t</td></tr></table> |          | Baseline (mean SD) | Follow-up (mean SD) | t-test t | HWSS Disclosure Concerns subscale | 6.3 (2.29) | 5.8 (2.37) | 2.15 | HWSS Concerns about Public Attitudes subscale | 6.6 (2.28) | 6.0 (2.26) | 3.08 | HWSS Negative Self-image subscale | 4.5 (1.90) | 4.2 (1.71) | 1.72 |  | Baseline (mean SD) | Follow-up (mean SD) | t-test t | HWSS Personalized Stigma subscale | 5.1 (1.7) | 4.8 (1.7) | 1.68 |  | Baseline (mean SD) | Follow-up (mean SD) | t-test t | +ethical approval by the National Healthcare Group's Institutional Review Board, Singapore (NHG DSRB Ref: 2020/00220).<br>+ recruitment procedure<br>+ outcome source and validation: use of validated questionnaires<br>+ chronology<br>+ funding stated (none)<br>+ no conflict of interest<br>+ all residents invited<br><br>- confounding: no adjustment of age<br>- analysis method |
|                                                      | Baseline (mean SD)                                                                                                                                                                | Follow-up (mean SD)                                                                                                                                                                                                                                                                                                                                                                                                                                                                       | t-test t                                 |                                                                                                                                                                                                                                                                                                                                                                                                                                                                                                                                                                                                                                                                   |                                                                                                                                                                                                                                                                                                                                                                                                                                                                                                                                                                                                                                                                                                                                                                                                                                                                                                                                                                                                                                                                                                                                           |          |                    |                     |          |                                   |            |            |      |                                               |            |            |      |                                   |            |            |      |  |                    |                     |          |                                   |           |           |      |  |                    |                     |          |                                                                                                                                                                                                                                                                                                                                                                                          |
| HWSS Disclosure Concerns subscale                    | 6.3 (2.29)                                                                                                                                                                        | 5.8 (2.37)                                                                                                                                                                                                                                                                                                                                                                                                                                                                                | 2.15                                     |                                                                                                                                                                                                                                                                                                                                                                                                                                                                                                                                                                                                                                                                   |                                                                                                                                                                                                                                                                                                                                                                                                                                                                                                                                                                                                                                                                                                                                                                                                                                                                                                                                                                                                                                                                                                                                           |          |                    |                     |          |                                   |            |            |      |                                               |            |            |      |                                   |            |            |      |  |                    |                     |          |                                   |           |           |      |  |                    |                     |          |                                                                                                                                                                                                                                                                                                                                                                                          |
| HWSS Concerns about Public Attitudes subscale        | 6.6 (2.28)                                                                                                                                                                        | 6.0 (2.26)                                                                                                                                                                                                                                                                                                                                                                                                                                                                                | 3.08                                     |                                                                                                                                                                                                                                                                                                                                                                                                                                                                                                                                                                                                                                                                   |                                                                                                                                                                                                                                                                                                                                                                                                                                                                                                                                                                                                                                                                                                                                                                                                                                                                                                                                                                                                                                                                                                                                           |          |                    |                     |          |                                   |            |            |      |                                               |            |            |      |                                   |            |            |      |  |                    |                     |          |                                   |           |           |      |  |                    |                     |          |                                                                                                                                                                                                                                                                                                                                                                                          |
| HWSS Negative Self-image subscale                    | 4.5 (1.90)                                                                                                                                                                        | 4.2 (1.71)                                                                                                                                                                                                                                                                                                                                                                                                                                                                                | 1.72                                     |                                                                                                                                                                                                                                                                                                                                                                                                                                                                                                                                                                                                                                                                   |                                                                                                                                                                                                                                                                                                                                                                                                                                                                                                                                                                                                                                                                                                                                                                                                                                                                                                                                                                                                                                                                                                                                           |          |                    |                     |          |                                   |            |            |      |                                               |            |            |      |                                   |            |            |      |  |                    |                     |          |                                   |           |           |      |  |                    |                     |          |                                                                                                                                                                                                                                                                                                                                                                                          |
|                                                      | Baseline (mean SD)                                                                                                                                                                | Follow-up (mean SD)                                                                                                                                                                                                                                                                                                                                                                                                                                                                       | t-test t                                 |                                                                                                                                                                                                                                                                                                                                                                                                                                                                                                                                                                                                                                                                   |                                                                                                                                                                                                                                                                                                                                                                                                                                                                                                                                                                                                                                                                                                                                                                                                                                                                                                                                                                                                                                                                                                                                           |          |                    |                     |          |                                   |            |            |      |                                               |            |            |      |                                   |            |            |      |  |                    |                     |          |                                   |           |           |      |  |                    |                     |          |                                                                                                                                                                                                                                                                                                                                                                                          |
| HWSS Personalized Stigma subscale                    | 5.1 (1.7)                                                                                                                                                                         | 4.8 (1.7)                                                                                                                                                                                                                                                                                                                                                                                                                                                                                 | 1.68                                     |                                                                                                                                                                                                                                                                                                                                                                                                                                                                                                                                                                                                                                                                   |                                                                                                                                                                                                                                                                                                                                                                                                                                                                                                                                                                                                                                                                                                                                                                                                                                                                                                                                                                                                                                                                                                                                           |          |                    |                     |          |                                   |            |            |      |                                               |            |            |      |                                   |            |            |      |  |                    |                     |          |                                   |           |           |      |  |                    |                     |          |                                                                                                                                                                                                                                                                                                                                                                                          |
|                                                      | Baseline (mean SD)                                                                                                                                                                | Follow-up (mean SD)                                                                                                                                                                                                                                                                                                                                                                                                                                                                       | t-test t                                 |                                                                                                                                                                                                                                                                                                                                                                                                                                                                                                                                                                                                                                                                   |                                                                                                                                                                                                                                                                                                                                                                                                                                                                                                                                                                                                                                                                                                                                                                                                                                                                                                                                                                                                                                                                                                                                           |          |                    |                     |          |                                   |            |            |      |                                               |            |            |      |                                   |            |            |      |  |                    |                     |          |                                   |           |           |      |  |                    |                     |          |                                                                                                                                                                                                                                                                                                                                                                                          |

| General                                             | Study                | Population                                           | Exposure                  | Outcome                                                       | Results                                                                                                                                                                                                                                                                                                                                                                                                                                                                                                                                                                                                                                                                                                                                                                                                                                                                                                                                                                                                                                                                                                                                                                                                                                                                                                                                                                                                                                                                                                                                                                                                                                      | Comments                                                    |               |               |      |          |   |   |        |                     |       |       |               |                      |         |         |                |                                |       |       |                |          |   |   |        |                       |       |       |               |                                              |       |       |                |                                                     |       |       |                |  |
|-----------------------------------------------------|----------------------|------------------------------------------------------|---------------------------|---------------------------------------------------------------|----------------------------------------------------------------------------------------------------------------------------------------------------------------------------------------------------------------------------------------------------------------------------------------------------------------------------------------------------------------------------------------------------------------------------------------------------------------------------------------------------------------------------------------------------------------------------------------------------------------------------------------------------------------------------------------------------------------------------------------------------------------------------------------------------------------------------------------------------------------------------------------------------------------------------------------------------------------------------------------------------------------------------------------------------------------------------------------------------------------------------------------------------------------------------------------------------------------------------------------------------------------------------------------------------------------------------------------------------------------------------------------------------------------------------------------------------------------------------------------------------------------------------------------------------------------------------------------------------------------------------------------------|-------------------------------------------------------------|---------------|---------------|------|----------|---|---|--------|---------------------|-------|-------|---------------|----------------------|---------|---------|----------------|--------------------------------|-------|-------|----------------|----------|---|---|--------|-----------------------|-------|-------|---------------|----------------------------------------------|-------|-------|----------------|-----------------------------------------------------|-------|-------|----------------|--|
|                                                     |                      |                                                      |                           |                                                               | <table><tr><td>HWSS total score</td><td>22.5<br/>(6.8)</td><td>20.8<br/>(6.9)</td><td>2.62</td></tr></table> <p>Table 3. Risk factors for HWSS amongst residents in training from national healthcare group residencies at the 2nd time point (linear regression).</p> <table><tr><td>Variable</td><td>B</td><td>β</td><td>95% CI</td></tr><tr><td>Females (vs. males)</td><td>0.500</td><td>0.036</td><td>-1.153- 2.153</td></tr><tr><td>Married (vs. single)</td><td>- 1.504</td><td>- 0.109</td><td>- 3.180- 0.172</td></tr><tr><td>Living with others (vs. alone)</td><td>1.725</td><td>0.070</td><td>- 1.240- 4.690</td></tr></table> <p><b>Conditions increasing work-related stigmatization:</b><br/>Table 3. Risk factors for HWSS amongst residents in training from national healthcare group residencies at the 2nd time point (linear regression).</p> <table><tr><td>Variable</td><td>B</td><td>β</td><td>95% CI</td></tr><tr><td>Seniors (vs. juniors)</td><td>1.016</td><td>0.071</td><td>- 0.676-2.708</td></tr><tr><td>Exposed to patients with respiratory illness</td><td>0.451</td><td>0.028</td><td>- 1.544- 2.446</td></tr><tr><td>Deployed to National Center for Infectious Diseases</td><td>1.443</td><td>0.105</td><td>- 0.287- 3.174</td></tr></table> <p><b>Measures to prevent/ deal with stigmatization at work:</b><br/><b>Tool used:</b> was not investigated</p> <p><b>Unfavourable health consequences associated with stigmatization:</b> Perceived, and traumatic stress. Results are shown in Tab. 2.</p> <p><b>Stigmatization studied in association with return-to-work:</b> was not investigated</p> | HWSS total score                                            | 22.5<br>(6.8) | 20.8<br>(6.9) | 2.62 | Variable | B | β | 95% CI | Females (vs. males) | 0.500 | 0.036 | -1.153- 2.153 | Married (vs. single) | - 1.504 | - 0.109 | - 3.180- 0.172 | Living with others (vs. alone) | 1.725 | 0.070 | - 1.240- 4.690 | Variable | B | β | 95% CI | Seniors (vs. juniors) | 1.016 | 0.071 | - 0.676-2.708 | Exposed to patients with respiratory illness | 0.451 | 0.028 | - 1.544- 2.446 | Deployed to National Center for Infectious Diseases | 1.443 | 0.105 | - 0.287- 3.174 |  |
| HWSS total score                                    | 22.5<br>(6.8)        | 20.8<br>(6.9)                                        | 2.62                      |                                                               |                                                                                                                                                                                                                                                                                                                                                                                                                                                                                                                                                                                                                                                                                                                                                                                                                                                                                                                                                                                                                                                                                                                                                                                                                                                                                                                                                                                                                                                                                                                                                                                                                                              |                                                             |               |               |      |          |   |   |        |                     |       |       |               |                      |         |         |                |                                |       |       |                |          |   |   |        |                       |       |       |               |                                              |       |       |                |                                                     |       |       |                |  |
| Variable                                            | B                    | β                                                    | 95% CI                    |                                                               |                                                                                                                                                                                                                                                                                                                                                                                                                                                                                                                                                                                                                                                                                                                                                                                                                                                                                                                                                                                                                                                                                                                                                                                                                                                                                                                                                                                                                                                                                                                                                                                                                                              |                                                             |               |               |      |          |   |   |        |                     |       |       |               |                      |         |         |                |                                |       |       |                |          |   |   |        |                       |       |       |               |                                              |       |       |                |                                                     |       |       |                |  |
| Females (vs. males)                                 | 0.500                | 0.036                                                | -1.153- 2.153             |                                                               |                                                                                                                                                                                                                                                                                                                                                                                                                                                                                                                                                                                                                                                                                                                                                                                                                                                                                                                                                                                                                                                                                                                                                                                                                                                                                                                                                                                                                                                                                                                                                                                                                                              |                                                             |               |               |      |          |   |   |        |                     |       |       |               |                      |         |         |                |                                |       |       |                |          |   |   |        |                       |       |       |               |                                              |       |       |                |                                                     |       |       |                |  |
| Married (vs. single)                                | - 1.504              | - 0.109                                              | - 3.180- 0.172            |                                                               |                                                                                                                                                                                                                                                                                                                                                                                                                                                                                                                                                                                                                                                                                                                                                                                                                                                                                                                                                                                                                                                                                                                                                                                                                                                                                                                                                                                                                                                                                                                                                                                                                                              |                                                             |               |               |      |          |   |   |        |                     |       |       |               |                      |         |         |                |                                |       |       |                |          |   |   |        |                       |       |       |               |                                              |       |       |                |                                                     |       |       |                |  |
| Living with others (vs. alone)                      | 1.725                | 0.070                                                | - 1.240- 4.690            |                                                               |                                                                                                                                                                                                                                                                                                                                                                                                                                                                                                                                                                                                                                                                                                                                                                                                                                                                                                                                                                                                                                                                                                                                                                                                                                                                                                                                                                                                                                                                                                                                                                                                                                              |                                                             |               |               |      |          |   |   |        |                     |       |       |               |                      |         |         |                |                                |       |       |                |          |   |   |        |                       |       |       |               |                                              |       |       |                |                                                     |       |       |                |  |
| Variable                                            | B                    | β                                                    | 95% CI                    |                                                               |                                                                                                                                                                                                                                                                                                                                                                                                                                                                                                                                                                                                                                                                                                                                                                                                                                                                                                                                                                                                                                                                                                                                                                                                                                                                                                                                                                                                                                                                                                                                                                                                                                              |                                                             |               |               |      |          |   |   |        |                     |       |       |               |                      |         |         |                |                                |       |       |                |          |   |   |        |                       |       |       |               |                                              |       |       |                |                                                     |       |       |                |  |
| Seniors (vs. juniors)                               | 1.016                | 0.071                                                | - 0.676-2.708             |                                                               |                                                                                                                                                                                                                                                                                                                                                                                                                                                                                                                                                                                                                                                                                                                                                                                                                                                                                                                                                                                                                                                                                                                                                                                                                                                                                                                                                                                                                                                                                                                                                                                                                                              |                                                             |               |               |      |          |   |   |        |                     |       |       |               |                      |         |         |                |                                |       |       |                |          |   |   |        |                       |       |       |               |                                              |       |       |                |                                                     |       |       |                |  |
| Exposed to patients with respiratory illness        | 0.451                | 0.028                                                | - 1.544- 2.446            |                                                               |                                                                                                                                                                                                                                                                                                                                                                                                                                                                                                                                                                                                                                                                                                                                                                                                                                                                                                                                                                                                                                                                                                                                                                                                                                                                                                                                                                                                                                                                                                                                                                                                                                              |                                                             |               |               |      |          |   |   |        |                     |       |       |               |                      |         |         |                |                                |       |       |                |          |   |   |        |                       |       |       |               |                                              |       |       |                |                                                     |       |       |                |  |
| Deployed to National Center for Infectious Diseases | 1.443                | 0.105                                                | - 0.287- 3.174            |                                                               |                                                                                                                                                                                                                                                                                                                                                                                                                                                                                                                                                                                                                                                                                                                                                                                                                                                                                                                                                                                                                                                                                                                                                                                                                                                                                                                                                                                                                                                                                                                                                                                                                                              |                                                             |               |               |      |          |   |   |        |                     |       |       |               |                      |         |         |                |                                |       |       |                |          |   |   |        |                       |       |       |               |                                              |       |       |                |                                                     |       |       |                |  |
| 775<br>Dang, 2020,                                  | <b>Study design:</b> | <b>Job description:</b><br>HCWs: n=120, Professional | Social isolation:<br>Data | Disclosure and discrimination related to COVID-19 work: self- | <b>Prevalence of stigmatization:</b><br><br>Self-stigma (perceived):                                                                                                                                                                                                                                                                                                                                                                                                                                                                                                                                                                                                                                                                                                                                                                                                                                                                                                                                                                                                                                                                                                                                                                                                                                                                                                                                                                                                                                                                                                                                                                         | + ethic approval from Review Committee of the Institute for |               |               |      |          |   |   |        |                     |       |       |               |                      |         |         |                |                                |       |       |                |          |   |   |        |                       |       |       |               |                                              |       |       |                |                                                     |       |       |                |  |

| General                                            | Study                                                                                            | Population                                                                                                                                                                                                                                                                                                                                                                                                                                                    | Exposure                                                                                 | Outcome                                                                                                                                                                                                                                                                                                                                                                                                                                                                                                                                       | Results                                                                                                                                                                                                                                                                                                                                                                                                                                                                                                                                                                                                                                                                                                                                                                                                                                                                                                                                                                                                                                                                                                                                                                                                                                                                                                                                                                                                                                                                                                                                                                                                                                                                       | Comments |                                                                 |  |  |       |        |                         |       |             |                               |       |              |                            |  |  |                        |       |              |                      |   |   |          |      |             |                                                    |  |  |                                    |       |              |        |     |  |                                                                                                                                                                                                                                                                     |
|----------------------------------------------------|--------------------------------------------------------------------------------------------------|---------------------------------------------------------------------------------------------------------------------------------------------------------------------------------------------------------------------------------------------------------------------------------------------------------------------------------------------------------------------------------------------------------------------------------------------------------------|------------------------------------------------------------------------------------------|-----------------------------------------------------------------------------------------------------------------------------------------------------------------------------------------------------------------------------------------------------------------------------------------------------------------------------------------------------------------------------------------------------------------------------------------------------------------------------------------------------------------------------------------------|-------------------------------------------------------------------------------------------------------------------------------------------------------------------------------------------------------------------------------------------------------------------------------------------------------------------------------------------------------------------------------------------------------------------------------------------------------------------------------------------------------------------------------------------------------------------------------------------------------------------------------------------------------------------------------------------------------------------------------------------------------------------------------------------------------------------------------------------------------------------------------------------------------------------------------------------------------------------------------------------------------------------------------------------------------------------------------------------------------------------------------------------------------------------------------------------------------------------------------------------------------------------------------------------------------------------------------------------------------------------------------------------------------------------------------------------------------------------------------------------------------------------------------------------------------------------------------------------------------------------------------------------------------------------------------|----------|-----------------------------------------------------------------|--|--|-------|--------|-------------------------|-------|-------------|-------------------------------|-------|--------------|----------------------------|--|--|------------------------|-------|--------------|----------------------|---|---|----------|------|-------------|----------------------------------------------------|--|--|------------------------------------|-------|--------------|--------|-----|--|---------------------------------------------------------------------------------------------------------------------------------------------------------------------------------------------------------------------------------------------------------------------|
| Vietnam<br>High risk                               | Cross-sectional<br><b>Time of Study:</b> 7 - 14 April 2020<br><b>Follow-up mean, range:</b> n.a. | educators: n=146, White collar workers: n=152, Students: n =147, Others: n=97<br><b>Inclusion criteria:</b> none<br><b># invited:</b> n.a. snowball technique<br><b># baseline:</b> n=1423 participated n=662 analysed<br><b># follow-up:</b> n.a.<br><b>Age at baseline:</b> Mean: Males: 36.7 (SD 10.7) years Females: 33.5 (SD ± 10.5) years<br><b>% of females:</b> 69.3%<br><b>Response:</b> n.a. (convenience sample)<br><b>Loss-to-follow-up:</b> n.a. | collection one week after social distancing and lockdown have been ordered by government | developed, non-validated: 4 items from 0 (strongly disagree) to 4 (strongly agree)<br><br><b>Form of stigmatization:</b><br><u>Self-stigma (perceived):</u><br><u>social exclusion</u><br>Being alienated because employment-related to COVID-19<br><br><u>Self-stigma (anticipated):</u> Afraid of sharing with family about risks of exposure to COVID- 19 at work; Avoid sharing occupational information<br><br><u>Associative stigma:</u><br><u>social exclusion</u><br>Relatives being alienated because employment related to COVID-19 | <i>Being alienated because employment-related to COVID-19:</i><br>Number of participants with maximum score: n = 7<br>Mean: males: 2.3 (SD 0.9), females: 2.3 (SD 1.0)<br><br><u>Self-stigma (anticipated):</u><br><i>Afraid of sharing with family about risks of exposure to COVID-19 at work:</i><br>Number of participants with maximum score: n = 15<br>Mean: males: 2.3 (SD 1.1), females: 2.0 (SD 1.0)<br><br><i>Avoid sharing occupational information:</i><br>Number of participants with maximum score: n = 4<br>Mean: males: 2.1 (SD 0.9), females: 2.0 (SD 0.9)<br><br><u>Associative stigma:</u><br>Number of participants with maximum score: n = 7<br>Mean: males: 2.1 (SD 1.0), females: 2.1 (SD 0.9)<br><br>Table 4: Factors associated with COVID-19<br><table><tr><th></th><th colspan="2">Disclosure and discrimination related to COVID-19 work exposure</th></tr><tr><th></th><th>Coef.</th><th>95% CI</th></tr><tr><td>Gender (Female vs male)</td><td>-0.14</td><td>-0.28; 0.00</td></tr><tr><td>Region (Central vs. Northern)</td><td>-0.28</td><td>-0.49; -0.06</td></tr><tr><td colspan="3"><i>Occupation (vs HCW)</i></td></tr><tr><td>Professional educators</td><td>-0.28</td><td>-0.44; -0.11</td></tr><tr><td>White collar workers</td><td>-</td><td>-</td></tr><tr><td>Students</td><td>0.30</td><td>-0.06; 0.66</td></tr><tr><td colspan="3"><i>Occupational status (vs salaried employees)</i></td></tr><tr><td>Self-employed/ unemployed/ retired</td><td>-0.39</td><td>-0.73; -0.04</td></tr><tr><td>Others</td><td>ref</td><td></td></tr></table><br><br><b>Conditions increasing work-related stigmatization:</b> was not investigated |          | Disclosure and discrimination related to COVID-19 work exposure |  |  | Coef. | 95% CI | Gender (Female vs male) | -0.14 | -0.28; 0.00 | Region (Central vs. Northern) | -0.28 | -0.49; -0.06 | <i>Occupation (vs HCW)</i> |  |  | Professional educators | -0.28 | -0.44; -0.11 | White collar workers | - | - | Students | 0.30 | -0.06; 0.66 | <i>Occupational status (vs salaried employees)</i> |  |  | Self-employed/ unemployed/ retired | -0.39 | -0.73; -0.04 | Others | ref |  | Preventive Medicine and Public Health, Hanoi Medical University<br>+ no conflict of interest<br>+ confounding<br><br>- recruitment procedure: convenience sample<br>- outcome: self-developed questionnaire<br><br>Funding by a foundation of a joint stock company |
|                                                    | Disclosure and discrimination related to COVID-19 work exposure                                  |                                                                                                                                                                                                                                                                                                                                                                                                                                                               |                                                                                          |                                                                                                                                                                                                                                                                                                                                                                                                                                                                                                                                               |                                                                                                                                                                                                                                                                                                                                                                                                                                                                                                                                                                                                                                                                                                                                                                                                                                                                                                                                                                                                                                                                                                                                                                                                                                                                                                                                                                                                                                                                                                                                                                                                                                                                               |          |                                                                 |  |  |       |        |                         |       |             |                               |       |              |                            |  |  |                        |       |              |                      |   |   |          |      |             |                                                    |  |  |                                    |       |              |        |     |  |                                                                                                                                                                                                                                                                     |
|                                                    | Coef.                                                                                            | 95% CI                                                                                                                                                                                                                                                                                                                                                                                                                                                        |                                                                                          |                                                                                                                                                                                                                                                                                                                                                                                                                                                                                                                                               |                                                                                                                                                                                                                                                                                                                                                                                                                                                                                                                                                                                                                                                                                                                                                                                                                                                                                                                                                                                                                                                                                                                                                                                                                                                                                                                                                                                                                                                                                                                                                                                                                                                                               |          |                                                                 |  |  |       |        |                         |       |             |                               |       |              |                            |  |  |                        |       |              |                      |   |   |          |      |             |                                                    |  |  |                                    |       |              |        |     |  |                                                                                                                                                                                                                                                                     |
| Gender (Female vs male)                            | -0.14                                                                                            | -0.28; 0.00                                                                                                                                                                                                                                                                                                                                                                                                                                                   |                                                                                          |                                                                                                                                                                                                                                                                                                                                                                                                                                                                                                                                               |                                                                                                                                                                                                                                                                                                                                                                                                                                                                                                                                                                                                                                                                                                                                                                                                                                                                                                                                                                                                                                                                                                                                                                                                                                                                                                                                                                                                                                                                                                                                                                                                                                                                               |          |                                                                 |  |  |       |        |                         |       |             |                               |       |              |                            |  |  |                        |       |              |                      |   |   |          |      |             |                                                    |  |  |                                    |       |              |        |     |  |                                                                                                                                                                                                                                                                     |
| Region (Central vs. Northern)                      | -0.28                                                                                            | -0.49; -0.06                                                                                                                                                                                                                                                                                                                                                                                                                                                  |                                                                                          |                                                                                                                                                                                                                                                                                                                                                                                                                                                                                                                                               |                                                                                                                                                                                                                                                                                                                                                                                                                                                                                                                                                                                                                                                                                                                                                                                                                                                                                                                                                                                                                                                                                                                                                                                                                                                                                                                                                                                                                                                                                                                                                                                                                                                                               |          |                                                                 |  |  |       |        |                         |       |             |                               |       |              |                            |  |  |                        |       |              |                      |   |   |          |      |             |                                                    |  |  |                                    |       |              |        |     |  |                                                                                                                                                                                                                                                                     |
| <i>Occupation (vs HCW)</i>                         |                                                                                                  |                                                                                                                                                                                                                                                                                                                                                                                                                                                               |                                                                                          |                                                                                                                                                                                                                                                                                                                                                                                                                                                                                                                                               |                                                                                                                                                                                                                                                                                                                                                                                                                                                                                                                                                                                                                                                                                                                                                                                                                                                                                                                                                                                                                                                                                                                                                                                                                                                                                                                                                                                                                                                                                                                                                                                                                                                                               |          |                                                                 |  |  |       |        |                         |       |             |                               |       |              |                            |  |  |                        |       |              |                      |   |   |          |      |             |                                                    |  |  |                                    |       |              |        |     |  |                                                                                                                                                                                                                                                                     |
| Professional educators                             | -0.28                                                                                            | -0.44; -0.11                                                                                                                                                                                                                                                                                                                                                                                                                                                  |                                                                                          |                                                                                                                                                                                                                                                                                                                                                                                                                                                                                                                                               |                                                                                                                                                                                                                                                                                                                                                                                                                                                                                                                                                                                                                                                                                                                                                                                                                                                                                                                                                                                                                                                                                                                                                                                                                                                                                                                                                                                                                                                                                                                                                                                                                                                                               |          |                                                                 |  |  |       |        |                         |       |             |                               |       |              |                            |  |  |                        |       |              |                      |   |   |          |      |             |                                                    |  |  |                                    |       |              |        |     |  |                                                                                                                                                                                                                                                                     |
| White collar workers                               | -                                                                                                | -                                                                                                                                                                                                                                                                                                                                                                                                                                                             |                                                                                          |                                                                                                                                                                                                                                                                                                                                                                                                                                                                                                                                               |                                                                                                                                                                                                                                                                                                                                                                                                                                                                                                                                                                                                                                                                                                                                                                                                                                                                                                                                                                                                                                                                                                                                                                                                                                                                                                                                                                                                                                                                                                                                                                                                                                                                               |          |                                                                 |  |  |       |        |                         |       |             |                               |       |              |                            |  |  |                        |       |              |                      |   |   |          |      |             |                                                    |  |  |                                    |       |              |        |     |  |                                                                                                                                                                                                                                                                     |
| Students                                           | 0.30                                                                                             | -0.06; 0.66                                                                                                                                                                                                                                                                                                                                                                                                                                                   |                                                                                          |                                                                                                                                                                                                                                                                                                                                                                                                                                                                                                                                               |                                                                                                                                                                                                                                                                                                                                                                                                                                                                                                                                                                                                                                                                                                                                                                                                                                                                                                                                                                                                                                                                                                                                                                                                                                                                                                                                                                                                                                                                                                                                                                                                                                                                               |          |                                                                 |  |  |       |        |                         |       |             |                               |       |              |                            |  |  |                        |       |              |                      |   |   |          |      |             |                                                    |  |  |                                    |       |              |        |     |  |                                                                                                                                                                                                                                                                     |
| <i>Occupational status (vs salaried employees)</i> |                                                                                                  |                                                                                                                                                                                                                                                                                                                                                                                                                                                               |                                                                                          |                                                                                                                                                                                                                                                                                                                                                                                                                                                                                                                                               |                                                                                                                                                                                                                                                                                                                                                                                                                                                                                                                                                                                                                                                                                                                                                                                                                                                                                                                                                                                                                                                                                                                                                                                                                                                                                                                                                                                                                                                                                                                                                                                                                                                                               |          |                                                                 |  |  |       |        |                         |       |             |                               |       |              |                            |  |  |                        |       |              |                      |   |   |          |      |             |                                                    |  |  |                                    |       |              |        |     |  |                                                                                                                                                                                                                                                                     |
| Self-employed/ unemployed/ retired                 | -0.39                                                                                            | -0.73; -0.04                                                                                                                                                                                                                                                                                                                                                                                                                                                  |                                                                                          |                                                                                                                                                                                                                                                                                                                                                                                                                                                                                                                                               |                                                                                                                                                                                                                                                                                                                                                                                                                                                                                                                                                                                                                                                                                                                                                                                                                                                                                                                                                                                                                                                                                                                                                                                                                                                                                                                                                                                                                                                                                                                                                                                                                                                                               |          |                                                                 |  |  |       |        |                         |       |             |                               |       |              |                            |  |  |                        |       |              |                      |   |   |          |      |             |                                                    |  |  |                                    |       |              |        |     |  |                                                                                                                                                                                                                                                                     |
| Others                                             | ref                                                                                              |                                                                                                                                                                                                                                                                                                                                                                                                                                                               |                                                                                          |                                                                                                                                                                                                                                                                                                                                                                                                                                                                                                                                               |                                                                                                                                                                                                                                                                                                                                                                                                                                                                                                                                                                                                                                                                                                                                                                                                                                                                                                                                                                                                                                                                                                                                                                                                                                                                                                                                                                                                                                                                                                                                                                                                                                                                               |          |                                                                 |  |  |       |        |                         |       |             |                               |       |              |                            |  |  |                        |       |              |                      |   |   |          |      |             |                                                    |  |  |                                    |       |              |        |     |  |                                                                                                                                                                                                                                                                     |

| General                                       | Study                                                                                                                  | Population                                                                                                                                                                                                                                                                                                                                                              | Exposure                                                                                                                           | Outcome                                                                                                                                                                                                                                                                                                                                                                                                                                                                                                                                                                                                                                                                                   | Results                                                                                                                                                                                                                                                                                                                                                                                                                                                                                                                                                                                                                                                                                                                                                                                                                                                                                                                                                                                                                                                                                                                                                                                                                                                                                                                                                                   | Comments |          |                                   |      |                                     |     |                               |     |                        |      |      |          |                                       |      |                                |     |      |          |                         |      |                                          |      |                                       |      |                                    |     |                                                                                                                                                                                                                                                                                                                                                                                                                                                                                                    |
|-----------------------------------------------|------------------------------------------------------------------------------------------------------------------------|-------------------------------------------------------------------------------------------------------------------------------------------------------------------------------------------------------------------------------------------------------------------------------------------------------------------------------------------------------------------------|------------------------------------------------------------------------------------------------------------------------------------|-------------------------------------------------------------------------------------------------------------------------------------------------------------------------------------------------------------------------------------------------------------------------------------------------------------------------------------------------------------------------------------------------------------------------------------------------------------------------------------------------------------------------------------------------------------------------------------------------------------------------------------------------------------------------------------------|---------------------------------------------------------------------------------------------------------------------------------------------------------------------------------------------------------------------------------------------------------------------------------------------------------------------------------------------------------------------------------------------------------------------------------------------------------------------------------------------------------------------------------------------------------------------------------------------------------------------------------------------------------------------------------------------------------------------------------------------------------------------------------------------------------------------------------------------------------------------------------------------------------------------------------------------------------------------------------------------------------------------------------------------------------------------------------------------------------------------------------------------------------------------------------------------------------------------------------------------------------------------------------------------------------------------------------------------------------------------------|----------|----------|-----------------------------------|------|-------------------------------------|-----|-------------------------------|-----|------------------------|------|------|----------|---------------------------------------|------|--------------------------------|-----|------|----------|-------------------------|------|------------------------------------------|------|---------------------------------------|------|------------------------------------|-----|----------------------------------------------------------------------------------------------------------------------------------------------------------------------------------------------------------------------------------------------------------------------------------------------------------------------------------------------------------------------------------------------------------------------------------------------------------------------------------------------------|
|                                               |                                                                                                                        |                                                                                                                                                                                                                                                                                                                                                                         |                                                                                                                                    |                                                                                                                                                                                                                                                                                                                                                                                                                                                                                                                                                                                                                                                                                           | <b>Measures to prevent/ deal with stigmatization at work:</b> was not investigated<br><br><b>Unfavourable health consequences associated with stigmatization:</b> was not investigated<br><br><b>Stigmatization studied in association with return-to-work:</b> was not investigated                                                                                                                                                                                                                                                                                                                                                                                                                                                                                                                                                                                                                                                                                                                                                                                                                                                                                                                                                                                                                                                                                      |          |          |                                   |      |                                     |     |                               |     |                        |      |      |          |                                       |      |                                |     |      |          |                         |      |                                          |      |                                       |      |                                    |     |                                                                                                                                                                                                                                                                                                                                                                                                                                                                                                    |
| 883<br>Do Duy, 2020, Vietnam<br><br>High risk | <b>Study design:</b> Cross-sectional<br><b>Time of Study:</b> 26 - 29 April 2020<br><b>Follow-up mean, range:</b> n.a. | <b>Job description:</b> Clinicians: n=7<br>Nurses: n=45<br>Others: n=9<br><b>Inclusion criteria:</b> Healthcare workers after quarantine<br><b># invited:</b> n.r.<br><b># baseline:</b> 61<br><b># follow-up:</b> n.a.<br><b>Age at baseline:</b> median 32 years (range 29-36)<br><b>% of females:</b> 82%<br><b>Response:</b> n.r.<br><b>Loss-to-follow-up:</b> n.a. | Lock-down of workplace because of COVID-19 outbreak-> all HCWs required quarantining for 23 days. Data collection after quarantine | Stigma scale: self-developed instrument: 12 questions (4-point Likert scale), sum up score 0-36<br><br>Items from group discussion with HCWs and investigators, adaption of Berger's HIV Stigma Scale for terms and phrases (validity checked with COSMIN)<br><br><b>Form of stigmatization:</b><br><u>Self-stigma (anticipated):</u><br>Feel unsafe to be a health worker, Feel blamed by relatives or friends, Try to hide being quarantined, Try to avoid going out<br><br><u>Self-stigma (internalized):</u><br>Feel guilty because of being isolated, Feel ashamed of being isolated<br><br><u>Self-stigma (perceived):</u><br><u>discrimination</u> People talk behind back, People | <b>Prevalence of stigmatization:</b><br>Median 11 (IR 6-15, min: 0, max: 24)<br><br><u>Self-stigma (anticipated):</u><br>Table 1: Factor analysis results of Stigma Scale <table><tr><th>Item</th><th>% agreed</th></tr><tr><td>Feel unsafe to be a health worker</td><td>18.0</td></tr><tr><td>Feel blamed by relatives or friends</td><td>9.8</td></tr><tr><td>Try to hide being quarantined</td><td>6.6</td></tr><tr><td>Try to avoid going out</td><td>65.6</td></tr></table><br><br><u>Self-stigma (internalized):</u><br>Table 1: Factor analysis results of Stigma Scale <table><tr><th>Item</th><th>% agreed</th></tr><tr><td>Feel guilty because of being isolated</td><td>34.4</td></tr><tr><td>Feel ashamed of being isolated</td><td>3.3</td></tr></table><br><br><u>Self-stigma (perceived):</u><br>Tab. 1: Factor analysis results of Stigma Scale: <table><tr><th>Item</th><th>% agreed</th></tr><tr><td>People talk behind back</td><td>39.3</td></tr><tr><td>People avoid touching and direct contact</td><td>34.4</td></tr><tr><td>People feel uncomfortable when around</td><td>31.2</td></tr><tr><td>Experienced discrimination actions</td><td>6.6</td></tr></table><br><br><b>Conditions increasing work-related stigmatization:</b> was not investigated<br><br><b>Measures to prevent/ deal with stigmatization at work:</b> was not investigated | Item     | % agreed | Feel unsafe to be a health worker | 18.0 | Feel blamed by relatives or friends | 9.8 | Try to hide being quarantined | 6.6 | Try to avoid going out | 65.6 | Item | % agreed | Feel guilty because of being isolated | 34.4 | Feel ashamed of being isolated | 3.3 | Item | % agreed | People talk behind back | 39.3 | People avoid touching and direct contact | 34.4 | People feel uncomfortable when around | 31.2 | Experienced discrimination actions | 6.6 | + study approved by director board of hospital<br>+ informed consent<br>+ all employees invited<br>+ no conflict of interest<br>+ outcome: self-developed instrument validated with COSMIN Risk of Bias Checklist<br><br>- recruitment procedure (# invited not reported)<br>- analysis method: statistical methods not appropriate -> only descriptive summary and correlations<br>- confounders not considered<br>- not reported which sub-sample was used for analyses<br>- funding no reported |
| Item                                          | % agreed                                                                                                               |                                                                                                                                                                                                                                                                                                                                                                         |                                                                                                                                    |                                                                                                                                                                                                                                                                                                                                                                                                                                                                                                                                                                                                                                                                                           |                                                                                                                                                                                                                                                                                                                                                                                                                                                                                                                                                                                                                                                                                                                                                                                                                                                                                                                                                                                                                                                                                                                                                                                                                                                                                                                                                                           |          |          |                                   |      |                                     |     |                               |     |                        |      |      |          |                                       |      |                                |     |      |          |                         |      |                                          |      |                                       |      |                                    |     |                                                                                                                                                                                                                                                                                                                                                                                                                                                                                                    |
| Feel unsafe to be a health worker             | 18.0                                                                                                                   |                                                                                                                                                                                                                                                                                                                                                                         |                                                                                                                                    |                                                                                                                                                                                                                                                                                                                                                                                                                                                                                                                                                                                                                                                                                           |                                                                                                                                                                                                                                                                                                                                                                                                                                                                                                                                                                                                                                                                                                                                                                                                                                                                                                                                                                                                                                                                                                                                                                                                                                                                                                                                                                           |          |          |                                   |      |                                     |     |                               |     |                        |      |      |          |                                       |      |                                |     |      |          |                         |      |                                          |      |                                       |      |                                    |     |                                                                                                                                                                                                                                                                                                                                                                                                                                                                                                    |
| Feel blamed by relatives or friends           | 9.8                                                                                                                    |                                                                                                                                                                                                                                                                                                                                                                         |                                                                                                                                    |                                                                                                                                                                                                                                                                                                                                                                                                                                                                                                                                                                                                                                                                                           |                                                                                                                                                                                                                                                                                                                                                                                                                                                                                                                                                                                                                                                                                                                                                                                                                                                                                                                                                                                                                                                                                                                                                                                                                                                                                                                                                                           |          |          |                                   |      |                                     |     |                               |     |                        |      |      |          |                                       |      |                                |     |      |          |                         |      |                                          |      |                                       |      |                                    |     |                                                                                                                                                                                                                                                                                                                                                                                                                                                                                                    |
| Try to hide being quarantined                 | 6.6                                                                                                                    |                                                                                                                                                                                                                                                                                                                                                                         |                                                                                                                                    |                                                                                                                                                                                                                                                                                                                                                                                                                                                                                                                                                                                                                                                                                           |                                                                                                                                                                                                                                                                                                                                                                                                                                                                                                                                                                                                                                                                                                                                                                                                                                                                                                                                                                                                                                                                                                                                                                                                                                                                                                                                                                           |          |          |                                   |      |                                     |     |                               |     |                        |      |      |          |                                       |      |                                |     |      |          |                         |      |                                          |      |                                       |      |                                    |     |                                                                                                                                                                                                                                                                                                                                                                                                                                                                                                    |
| Try to avoid going out                        | 65.6                                                                                                                   |                                                                                                                                                                                                                                                                                                                                                                         |                                                                                                                                    |                                                                                                                                                                                                                                                                                                                                                                                                                                                                                                                                                                                                                                                                                           |                                                                                                                                                                                                                                                                                                                                                                                                                                                                                                                                                                                                                                                                                                                                                                                                                                                                                                                                                                                                                                                                                                                                                                                                                                                                                                                                                                           |          |          |                                   |      |                                     |     |                               |     |                        |      |      |          |                                       |      |                                |     |      |          |                         |      |                                          |      |                                       |      |                                    |     |                                                                                                                                                                                                                                                                                                                                                                                                                                                                                                    |
| Item                                          | % agreed                                                                                                               |                                                                                                                                                                                                                                                                                                                                                                         |                                                                                                                                    |                                                                                                                                                                                                                                                                                                                                                                                                                                                                                                                                                                                                                                                                                           |                                                                                                                                                                                                                                                                                                                                                                                                                                                                                                                                                                                                                                                                                                                                                                                                                                                                                                                                                                                                                                                                                                                                                                                                                                                                                                                                                                           |          |          |                                   |      |                                     |     |                               |     |                        |      |      |          |                                       |      |                                |     |      |          |                         |      |                                          |      |                                       |      |                                    |     |                                                                                                                                                                                                                                                                                                                                                                                                                                                                                                    |
| Feel guilty because of being isolated         | 34.4                                                                                                                   |                                                                                                                                                                                                                                                                                                                                                                         |                                                                                                                                    |                                                                                                                                                                                                                                                                                                                                                                                                                                                                                                                                                                                                                                                                                           |                                                                                                                                                                                                                                                                                                                                                                                                                                                                                                                                                                                                                                                                                                                                                                                                                                                                                                                                                                                                                                                                                                                                                                                                                                                                                                                                                                           |          |          |                                   |      |                                     |     |                               |     |                        |      |      |          |                                       |      |                                |     |      |          |                         |      |                                          |      |                                       |      |                                    |     |                                                                                                                                                                                                                                                                                                                                                                                                                                                                                                    |
| Feel ashamed of being isolated                | 3.3                                                                                                                    |                                                                                                                                                                                                                                                                                                                                                                         |                                                                                                                                    |                                                                                                                                                                                                                                                                                                                                                                                                                                                                                                                                                                                                                                                                                           |                                                                                                                                                                                                                                                                                                                                                                                                                                                                                                                                                                                                                                                                                                                                                                                                                                                                                                                                                                                                                                                                                                                                                                                                                                                                                                                                                                           |          |          |                                   |      |                                     |     |                               |     |                        |      |      |          |                                       |      |                                |     |      |          |                         |      |                                          |      |                                       |      |                                    |     |                                                                                                                                                                                                                                                                                                                                                                                                                                                                                                    |
| Item                                          | % agreed                                                                                                               |                                                                                                                                                                                                                                                                                                                                                                         |                                                                                                                                    |                                                                                                                                                                                                                                                                                                                                                                                                                                                                                                                                                                                                                                                                                           |                                                                                                                                                                                                                                                                                                                                                                                                                                                                                                                                                                                                                                                                                                                                                                                                                                                                                                                                                                                                                                                                                                                                                                                                                                                                                                                                                                           |          |          |                                   |      |                                     |     |                               |     |                        |      |      |          |                                       |      |                                |     |      |          |                         |      |                                          |      |                                       |      |                                    |     |                                                                                                                                                                                                                                                                                                                                                                                                                                                                                                    |
| People talk behind back                       | 39.3                                                                                                                   |                                                                                                                                                                                                                                                                                                                                                                         |                                                                                                                                    |                                                                                                                                                                                                                                                                                                                                                                                                                                                                                                                                                                                                                                                                                           |                                                                                                                                                                                                                                                                                                                                                                                                                                                                                                                                                                                                                                                                                                                                                                                                                                                                                                                                                                                                                                                                                                                                                                                                                                                                                                                                                                           |          |          |                                   |      |                                     |     |                               |     |                        |      |      |          |                                       |      |                                |     |      |          |                         |      |                                          |      |                                       |      |                                    |     |                                                                                                                                                                                                                                                                                                                                                                                                                                                                                                    |
| People avoid touching and direct contact      | 34.4                                                                                                                   |                                                                                                                                                                                                                                                                                                                                                                         |                                                                                                                                    |                                                                                                                                                                                                                                                                                                                                                                                                                                                                                                                                                                                                                                                                                           |                                                                                                                                                                                                                                                                                                                                                                                                                                                                                                                                                                                                                                                                                                                                                                                                                                                                                                                                                                                                                                                                                                                                                                                                                                                                                                                                                                           |          |          |                                   |      |                                     |     |                               |     |                        |      |      |          |                                       |      |                                |     |      |          |                         |      |                                          |      |                                       |      |                                    |     |                                                                                                                                                                                                                                                                                                                                                                                                                                                                                                    |
| People feel uncomfortable when around         | 31.2                                                                                                                   |                                                                                                                                                                                                                                                                                                                                                                         |                                                                                                                                    |                                                                                                                                                                                                                                                                                                                                                                                                                                                                                                                                                                                                                                                                                           |                                                                                                                                                                                                                                                                                                                                                                                                                                                                                                                                                                                                                                                                                                                                                                                                                                                                                                                                                                                                                                                                                                                                                                                                                                                                                                                                                                           |          |          |                                   |      |                                     |     |                               |     |                        |      |      |          |                                       |      |                                |     |      |          |                         |      |                                          |      |                                       |      |                                    |     |                                                                                                                                                                                                                                                                                                                                                                                                                                                                                                    |
| Experienced discrimination actions            | 6.6                                                                                                                    |                                                                                                                                                                                                                                                                                                                                                                         |                                                                                                                                    |                                                                                                                                                                                                                                                                                                                                                                                                                                                                                                                                                                                                                                                                                           |                                                                                                                                                                                                                                                                                                                                                                                                                                                                                                                                                                                                                                                                                                                                                                                                                                                                                                                                                                                                                                                                                                                                                                                                                                                                                                                                                                           |          |          |                                   |      |                                     |     |                               |     |                        |      |      |          |                                       |      |                                |     |      |          |                         |      |                                          |      |                                       |      |                                    |     |                                                                                                                                                                                                                                                                                                                                                                                                                                                                                                    |

| General                                 | Study                                                                                                                                                           | Population                                                                                                                                                                                                                                                                                                                                                                                                                                                                                                        | Exposure                                                                              | Outcome                                                                                                                                                                                                                                                                                                                                                                                                                                                                                                                                                                                                     | Results                                                                                                                                                                                                                                                                                                                                                                                                                                                                                                                                                                                                                                                                                                                                                                                                                                                                                                                                                                                                                                                                                                                                                                                                                                                                             | Comments |                                                  |  |            |    |  |           |          |             |             |                                |            |            |                  |                  |                                      |           |             |                                                                                                                                                                                                                                                                                                                           |
|-----------------------------------------|-----------------------------------------------------------------------------------------------------------------------------------------------------------------|-------------------------------------------------------------------------------------------------------------------------------------------------------------------------------------------------------------------------------------------------------------------------------------------------------------------------------------------------------------------------------------------------------------------------------------------------------------------------------------------------------------------|---------------------------------------------------------------------------------------|-------------------------------------------------------------------------------------------------------------------------------------------------------------------------------------------------------------------------------------------------------------------------------------------------------------------------------------------------------------------------------------------------------------------------------------------------------------------------------------------------------------------------------------------------------------------------------------------------------------|-------------------------------------------------------------------------------------------------------------------------------------------------------------------------------------------------------------------------------------------------------------------------------------------------------------------------------------------------------------------------------------------------------------------------------------------------------------------------------------------------------------------------------------------------------------------------------------------------------------------------------------------------------------------------------------------------------------------------------------------------------------------------------------------------------------------------------------------------------------------------------------------------------------------------------------------------------------------------------------------------------------------------------------------------------------------------------------------------------------------------------------------------------------------------------------------------------------------------------------------------------------------------------------|----------|--------------------------------------------------|--|------------|----|--|-----------|----------|-------------|-------------|--------------------------------|------------|------------|------------------|------------------|--------------------------------------|-----------|-------------|---------------------------------------------------------------------------------------------------------------------------------------------------------------------------------------------------------------------------------------------------------------------------------------------------------------------------|
|                                         |                                                                                                                                                                 |                                                                                                                                                                                                                                                                                                                                                                                                                                                                                                                   |                                                                                       | avoid touching and direct contact, People feel uncomfortable when around, Experienced discrimination actions                                                                                                                                                                                                                                                                                                                                                                                                                                                                                                | <p><b>Unfavourable health consequences associated with stigmatization:</b> Depression, anxiety, and stress. Results are shown in Tab. 2.</p> <p><b>Stigmatization studied in association with return-to-work:</b> yes - &gt; data collection after quarantine of all workers in a hospital that was locked-down because of SARS-CoV2 outbreak</p>                                                                                                                                                                                                                                                                                                                                                                                                                                                                                                                                                                                                                                                                                                                                                                                                                                                                                                                                   |          |                                                  |  |            |    |  |           |          |             |             |                                |            |            |                  |                  |                                      |           |             |                                                                                                                                                                                                                                                                                                                           |
| 7271<br>Dye, USA, 2020<br><br>High risk | <p><b>Study design:</b> Cross-sectional study with qualitative part</p> <p><b>Time of Study:</b> 6 April - 29 May</p> <p><b>Follow-up mean, range:</b> n.a.</p> | <p><b>Job description:</b> n.r. (-&gt; all)</p> <p><b>Inclusion criteria:</b> none</p> <p><b># invited:</b> convenience sample -&gt; recruitment via mTURK (access to a multilingual digital workforce) and Facebook, Instagram, facebook Audience Network</p> <p><b># baseline:</b> n = 7411 from 173 countries</p> <p><b># follow-up:</b> n.a.</p> <p><b>Age at baseline:</b> n.r.</p> <p><b>% of females:</b> n.r.</p> <p><b>Response:</b> n.a. (convenience sample)</p> <p><b>Loss-to-follow-up:</b> n.a.</p> | <p>During COVID-19 pandemic -&gt; Working in health care setting around the world</p> | <p>1 item, derived from the KFF Corona-virus Poll 26 question: Do you or anyone in your household work in a healthcare delivery setting, such as a doctor's office, clinic, hospital, nursing home or dentist's office?</p> <p>Have you or a family member been harassed, bullied or hurt because of coronavirus? (yes, no/don't know) -&gt; If yes, participants were asked to explain (open-end question)</p> <p><b>Form of stigmatization:</b><br/><u>Self-stigma (perceived):</u><br/><u>aggressive behaviour/mobbing</u></p> <p><u>Associative stigma:</u><br/><u>aggressive behaviour/mobbing</u></p> | <p><b>Prevalence of stigmatization:</b></p> <p><u>Self-stigma (perceived) and associative stigma:</u></p> <p>Tab.1: Association of COVID-19-related variables with working in HC-setting and COVID-19 related harassment and bullying</p> <table><tr><th></th><th colspan="2">Harassed, bullied or hurt because of coronavirus</th><th>M1 (crude)</th><th>M2</th></tr><tr><th></th><th>Yes n (%)</th><th>No n (%)</th><th>OR (95% CI)</th><th>OR (95% CI)</th></tr><tr><td>I work in a healthcare setting</td><td>151 (18.1)</td><td>685 (81.9)</td><td rowspan="2">2.9 (2.3 to 3.5)</td><td rowspan="2">1.5 (1.2 to 1.9)</td></tr><tr><td>I don't work in a healthcare setting</td><td>444 (7.1)</td><td>5771 (92.9)</td></tr></table> <p>M2 adjusted for: could not work from home, have/have had COVID-19, have not closely followed social-physical distancing, have family/neighbour with COVID-19, have friend/family/neighbour who died from COVID-19, have at least one chronic disease, have child care responsibilities, have elder care responsibilities, reside in Africa/Asia/Northern America/Oceania</p> <p><u>Qualitative part:</u><br/>See table for qualitative studies</p> <p><b>Conditions increasing work-related stigmatization:</b> was not investigated</p> |          | Harassed, bullied or hurt because of coronavirus |  | M1 (crude) | M2 |  | Yes n (%) | No n (%) | OR (95% CI) | OR (95% CI) | I work in a healthcare setting | 151 (18.1) | 685 (81.9) | 2.9 (2.3 to 3.5) | 1.5 (1.2 to 1.9) | I don't work in a healthcare setting | 444 (7.1) | 5771 (92.9) | <p>+ ethic approval from University of Rochester's Research Subjects Review Board</p> <p>+ no conflict of interest</p> <p>+ Funding source</p> <p>+ confounding</p> <p>+ analysis method</p> <p>- recruitment procedure: convenience sample</p> <p>- outcome: only one question for harassment/bullied, not validated</p> |
|                                         | Harassed, bullied or hurt because of coronavirus                                                                                                                |                                                                                                                                                                                                                                                                                                                                                                                                                                                                                                                   | M1 (crude)                                                                            | M2                                                                                                                                                                                                                                                                                                                                                                                                                                                                                                                                                                                                          |                                                                                                                                                                                                                                                                                                                                                                                                                                                                                                                                                                                                                                                                                                                                                                                                                                                                                                                                                                                                                                                                                                                                                                                                                                                                                     |          |                                                  |  |            |    |  |           |          |             |             |                                |            |            |                  |                  |                                      |           |             |                                                                                                                                                                                                                                                                                                                           |
|                                         | Yes n (%)                                                                                                                                                       | No n (%)                                                                                                                                                                                                                                                                                                                                                                                                                                                                                                          | OR (95% CI)                                                                           | OR (95% CI)                                                                                                                                                                                                                                                                                                                                                                                                                                                                                                                                                                                                 |                                                                                                                                                                                                                                                                                                                                                                                                                                                                                                                                                                                                                                                                                                                                                                                                                                                                                                                                                                                                                                                                                                                                                                                                                                                                                     |          |                                                  |  |            |    |  |           |          |             |             |                                |            |            |                  |                  |                                      |           |             |                                                                                                                                                                                                                                                                                                                           |
| I work in a healthcare setting          | 151 (18.1)                                                                                                                                                      | 685 (81.9)                                                                                                                                                                                                                                                                                                                                                                                                                                                                                                        | 2.9 (2.3 to 3.5)                                                                      | 1.5 (1.2 to 1.9)                                                                                                                                                                                                                                                                                                                                                                                                                                                                                                                                                                                            |                                                                                                                                                                                                                                                                                                                                                                                                                                                                                                                                                                                                                                                                                                                                                                                                                                                                                                                                                                                                                                                                                                                                                                                                                                                                                     |          |                                                  |  |            |    |  |           |          |             |             |                                |            |            |                  |                  |                                      |           |             |                                                                                                                                                                                                                                                                                                                           |
| I don't work in a healthcare setting    | 444 (7.1)                                                                                                                                                       | 5771 (92.9)                                                                                                                                                                                                                                                                                                                                                                                                                                                                                                       |                                                                                       |                                                                                                                                                                                                                                                                                                                                                                                                                                                                                                                                                                                                             |                                                                                                                                                                                                                                                                                                                                                                                                                                                                                                                                                                                                                                                                                                                                                                                                                                                                                                                                                                                                                                                                                                                                                                                                                                                                                     |          |                                                  |  |            |    |  |           |          |             |             |                                |            |            |                  |                  |                                      |           |             |                                                                                                                                                                                                                                                                                                                           |



| General                                     | Study                                                                                                                  | Population                                                                                                                                                                                                                                                                                                                                                                                                                                                                                                                                                                               | Exposure                                                        | Outcome                                                                                                                            | Results                                                                                                                                                                                                                                                                                                                                                                                                                                                                                                                                                                                                                                                                                               | Comments           |   |   |                     |     |    |                                                                                                                                                                                                                                                                                                                                                                                                                                                                                                                                                                                                          |
|---------------------------------------------|------------------------------------------------------------------------------------------------------------------------|------------------------------------------------------------------------------------------------------------------------------------------------------------------------------------------------------------------------------------------------------------------------------------------------------------------------------------------------------------------------------------------------------------------------------------------------------------------------------------------------------------------------------------------------------------------------------------------|-----------------------------------------------------------------|------------------------------------------------------------------------------------------------------------------------------------|-------------------------------------------------------------------------------------------------------------------------------------------------------------------------------------------------------------------------------------------------------------------------------------------------------------------------------------------------------------------------------------------------------------------------------------------------------------------------------------------------------------------------------------------------------------------------------------------------------------------------------------------------------------------------------------------------------|--------------------|---|---|---------------------|-----|----|----------------------------------------------------------------------------------------------------------------------------------------------------------------------------------------------------------------------------------------------------------------------------------------------------------------------------------------------------------------------------------------------------------------------------------------------------------------------------------------------------------------------------------------------------------------------------------------------------------|
|                                             |                                                                                                                        |                                                                                                                                                                                                                                                                                                                                                                                                                                                                                                                                                                                          |                                                                 |                                                                                                                                    | <b>Measures to prevent/ deal with stigmatization at work:</b> was not investigated<br><br><b>Unfavourable health consequences associated with stigmatization:</b> was not investigated<br><br><b>Stigmatization studied in association with return-to-work:</b> was not investigated                                                                                                                                                                                                                                                                                                                                                                                                                  |                    |   |   |                     |     |    |                                                                                                                                                                                                                                                                                                                                                                                                                                                                                                                                                                                                          |
| 859<br>Elhadi, 2020, Libya<br><br>High risk | <b>Study design:</b> Cross-sectional<br><b>Time of Study:</b> 18 - 28 April 2020<br><b>Follow-up mean, range:</b> n.a. | <b>Job description:</b> HCWs (doctors and nurses) from 15 hospitals working during the outbreak period (March and April 2020)<br><b>Inclusion criteria:</b> exclusion of participants with a history of mental illness and exclusion of those who did not work during the outbreak period (March and April 2020)<br><b># invited:</b> n.a. snowball technique<br><b># baseline:</b> n=745<br><b># follow-up:</b> n.a.<br><b>Age at baseline:</b> mean 33.3 years (SD± 7.4)<br><b>% of females:</b> 51.9%<br><b>Response:</b> n.a. (convenience sample)<br><b>Loss-to-follow-up:</b> n.a. | During COVID-19 pandemic (not specified) and civil war in Libya | Stigmatization: single item “feeling stigmatized” (yes/no)<br><br><b>Form of stigmatization:</b><br><u>Self-stigma (perceived)</u> | <b>Prevalence of stigmatization:</b><br><u>Self-stigma (perceived):</u><br><br>Tab. 1: Feeling stigmatized due to COVID-19 (N=745) <table><tr><th>Healthcare workers</th><th>n</th><th>%</th></tr><tr><td>Feeling stigmatized</td><td>231</td><td>31</td></tr></table><br><b>Conditions increasing work-related stigmatization:</b> was not investigated<br><br><b>Measures to prevent/ deal with stigmatization at work:</b> was not investigated<br><br><b>Unfavourable health consequences associated with stigmatization:</b> Depressive symptoms, anxiety symptoms<br>Results are shown in Tab. 2.<br><br><b>Stigmatization studied in association with return-to-work:</b> was not investigated | Healthcare workers | n | % | Feeling stigmatized | 231 | 31 | + informed consent<br>+ approval by the Bioethics Committee of the Biotechnology Research Center<br>+ no conflict of interest<br>+ research received no funding<br>+ measurement of depression and anxiety with a validated instrument<br><br>- recruitment procedure: convenience sample<br>- outcome: measurement of stigmatization with a single question<br>- analysis method: - investigation of the association between stigmatization and depressive and anxiety symptoms only with Pearson's chi-square test<br>- no consideration of any confounders in the analysis of the association between |
| Healthcare workers                          | n                                                                                                                      | %                                                                                                                                                                                                                                                                                                                                                                                                                                                                                                                                                                                        |                                                                 |                                                                                                                                    |                                                                                                                                                                                                                                                                                                                                                                                                                                                                                                                                                                                                                                                                                                       |                    |   |   |                     |     |    |                                                                                                                                                                                                                                                                                                                                                                                                                                                                                                                                                                                                          |
| Feeling stigmatized                         | 231                                                                                                                    | 31                                                                                                                                                                                                                                                                                                                                                                                                                                                                                                                                                                                       |                                                                 |                                                                                                                                    |                                                                                                                                                                                                                                                                                                                                                                                                                                                                                                                                                                                                                                                                                                       |                    |   |   |                     |     |    |                                                                                                                                                                                                                                                                                                                                                                                                                                                                                                                                                                                                          |

| General                                      | Study                                                                                                                     | Population                                                                                                                                                                                                                                                                                                                                                                                                                                                                                                                                                                                               | Exposure                                                        | Outcome                                                                                                                            | Results                                                                                                                                                                                                                                                                                                                                                                                                                                                                                                                                                                                                                                                                                                                                                                                                                                                                                                                                                                                                         | Comments                                                                                                                                       |                    |                    |                  |     |         |                                |  |  |  |  |  |     |            |           |           |      |       |    |            |            |            |                                                                                                                                                                                                                                                                                                                                                                                                                                                                                                                                                                                            |
|----------------------------------------------|---------------------------------------------------------------------------------------------------------------------------|----------------------------------------------------------------------------------------------------------------------------------------------------------------------------------------------------------------------------------------------------------------------------------------------------------------------------------------------------------------------------------------------------------------------------------------------------------------------------------------------------------------------------------------------------------------------------------------------------------|-----------------------------------------------------------------|------------------------------------------------------------------------------------------------------------------------------------|-----------------------------------------------------------------------------------------------------------------------------------------------------------------------------------------------------------------------------------------------------------------------------------------------------------------------------------------------------------------------------------------------------------------------------------------------------------------------------------------------------------------------------------------------------------------------------------------------------------------------------------------------------------------------------------------------------------------------------------------------------------------------------------------------------------------------------------------------------------------------------------------------------------------------------------------------------------------------------------------------------------------|------------------------------------------------------------------------------------------------------------------------------------------------|--------------------|--------------------|------------------|-----|---------|--------------------------------|--|--|--|--|--|-----|------------|-----------|-----------|------|-------|----|------------|------------|------------|--------------------------------------------------------------------------------------------------------------------------------------------------------------------------------------------------------------------------------------------------------------------------------------------------------------------------------------------------------------------------------------------------------------------------------------------------------------------------------------------------------------------------------------------------------------------------------------------|
|                                              |                                                                                                                           |                                                                                                                                                                                                                                                                                                                                                                                                                                                                                                                                                                                                          |                                                                 |                                                                                                                                    |                                                                                                                                                                                                                                                                                                                                                                                                                                                                                                                                                                                                                                                                                                                                                                                                                                                                                                                                                                                                                 | stigmatization and depressive and anxiety symptoms<br>- no investigation of a temporal relationship possible due to the cross-sectional design |                    |                    |                  |     |         |                                |  |  |  |  |  |     |            |           |           |      |       |    |            |            |            |                                                                                                                                                                                                                                                                                                                                                                                                                                                                                                                                                                                            |
| 7273<br>Elhadi, 2020, Libya<br><br>High risk | <b>Study design:</b> Cross-sectional<br><b>Time of Study:</b> 18 April - 2 May 2020<br><b>Follow-up mean, range:</b> n.a. | <b>Job description:</b> HCWs<br><b>Inclusion criteria:</b> working in late March and April, and in either surgery, internal medicine, intensive care, or emergency departments<br>Exclusion: participants with history of mental illness, having patients with mental illnesses or severe chronic diseases such as advanced diabetes, hypertension, and tuberculosis<br><b># invited:</b> n=600<br><b># baseline:</b> n=532<br><b># follow -up:</b> n.a.<br><b>Age at baseline:</b> mean: 33.1 years (SD ±7.3)<br><b>% of females:</b> 44.7%<br><b>Response:</b> 88.7%<br><b>Loss-to-follow-up:</b> n.a. | During COVID-19 pandemic (not specified) and civil war in Libya | Stigmatization: single item “feeling stigmatized” (yes/no)<br><br><b>Form of stigmatization:</b><br><u>Self-stigma (perceived)</u> | <b>Prevalence of stigmatization:</b><br><u>Self-stigma (perceived)</u><br><br>Tab. 1: Baseline characteristics of study participants (n = 532) <table><tr><th>Variable</th><th>Total (%)<br/>n=532</th><th>Women (%)<br/>n=238</th><th>Men (%)<br/>n=294</th><th>Phi</th><th>p-value</th></tr><tr><td colspan="6">Stigmatization due to COVID-19</td></tr><tr><td>Yes</td><td>169 (31.8)</td><td>86 (36.1)</td><td>83 (28.2)</td><td rowspan="2">0.08</td><td rowspan="2">0.052</td></tr><tr><td>No</td><td>363 (68.2)</td><td>152 (63.9)</td><td>211 (71.8)</td></tr></table><br><b>Conditions increasing work-related stigmatization:</b> was not investigated<br><br><b>Measures to prevent/ deal with stigmatization at work:</b> was not investigated<br><br><b>Unfavourable health consequences associated with stigmatization:</b> Emotional exhaustion, depersonalization<br>Results are shown in Tab. 2.<br><br><b>Stigmatization studied in association with return-to-work:</b> was not investigated | Variable                                                                                                                                       | Total (%)<br>n=532 | Women (%)<br>n=238 | Men (%)<br>n=294 | Phi | p-value | Stigmatization due to COVID-19 |  |  |  |  |  | Yes | 169 (31.8) | 86 (36.1) | 83 (28.2) | 0.08 | 0.052 | No | 363 (68.2) | 152 (63.9) | 211 (71.8) | + outcome: usage of a validated measuring tool for burnout<br>+ re-validation with study sample<br>+ ethics approval by the Bioethics Committee at the Biotechnology Research Center<br>+ informed consent<br>+ recruitment procedure<br><br>- outcome: measurement of stigmatization with a single item question<br>- analysis method: investigation between stigmatization and burnout only with Spearman’s rank-order correlation test<br>- no consideration of confounders<br>- cross-sectional study design (no causation between variables possible)<br>- fear of stigmatization may |
| Variable                                     | Total (%)<br>n=532                                                                                                        | Women (%)<br>n=238                                                                                                                                                                                                                                                                                                                                                                                                                                                                                                                                                                                       | Men (%)<br>n=294                                                | Phi                                                                                                                                | p-value                                                                                                                                                                                                                                                                                                                                                                                                                                                                                                                                                                                                                                                                                                                                                                                                                                                                                                                                                                                                         |                                                                                                                                                |                    |                    |                  |     |         |                                |  |  |  |  |  |     |            |           |           |      |       |    |            |            |            |                                                                                                                                                                                                                                                                                                                                                                                                                                                                                                                                                                                            |
| Stigmatization due to COVID-19               |                                                                                                                           |                                                                                                                                                                                                                                                                                                                                                                                                                                                                                                                                                                                                          |                                                                 |                                                                                                                                    |                                                                                                                                                                                                                                                                                                                                                                                                                                                                                                                                                                                                                                                                                                                                                                                                                                                                                                                                                                                                                 |                                                                                                                                                |                    |                    |                  |     |         |                                |  |  |  |  |  |     |            |           |           |      |       |    |            |            |            |                                                                                                                                                                                                                                                                                                                                                                                                                                                                                                                                                                                            |
| Yes                                          | 169 (31.8)                                                                                                                | 86 (36.1)                                                                                                                                                                                                                                                                                                                                                                                                                                                                                                                                                                                                | 83 (28.2)                                                       | 0.08                                                                                                                               | 0.052                                                                                                                                                                                                                                                                                                                                                                                                                                                                                                                                                                                                                                                                                                                                                                                                                                                                                                                                                                                                           |                                                                                                                                                |                    |                    |                  |     |         |                                |  |  |  |  |  |     |            |           |           |      |       |    |            |            |            |                                                                                                                                                                                                                                                                                                                                                                                                                                                                                                                                                                                            |
| No                                           | 363 (68.2)                                                                                                                | 152 (63.9)                                                                                                                                                                                                                                                                                                                                                                                                                                                                                                                                                                                               | 211 (71.8)                                                      |                                                                                                                                    |                                                                                                                                                                                                                                                                                                                                                                                                                                                                                                                                                                                                                                                                                                                                                                                                                                                                                                                                                                                                                 |                                                                                                                                                |                    |                    |                  |     |         |                                |  |  |  |  |  |     |            |           |           |      |       |    |            |            |            |                                                                                                                                                                                                                                                                                                                                                                                                                                                                                                                                                                                            |

| General                                   | Study                                                                                                                     | Population                                                                                                                                                                                                                                                                                                                                                                                                                                                                                                                                                                                                                        | Exposure                                                                          | Outcome                                                                                                                                                                                   | Results                                                                                                                                                                                                                                                                                                                                                                                                                                                                                                                                                                        | Comments                                                                                                                                                                                                                                                                                                                                                                                                                                                                                                                                                                                                                                         |
|-------------------------------------------|---------------------------------------------------------------------------------------------------------------------------|-----------------------------------------------------------------------------------------------------------------------------------------------------------------------------------------------------------------------------------------------------------------------------------------------------------------------------------------------------------------------------------------------------------------------------------------------------------------------------------------------------------------------------------------------------------------------------------------------------------------------------------|-----------------------------------------------------------------------------------|-------------------------------------------------------------------------------------------------------------------------------------------------------------------------------------------|--------------------------------------------------------------------------------------------------------------------------------------------------------------------------------------------------------------------------------------------------------------------------------------------------------------------------------------------------------------------------------------------------------------------------------------------------------------------------------------------------------------------------------------------------------------------------------|--------------------------------------------------------------------------------------------------------------------------------------------------------------------------------------------------------------------------------------------------------------------------------------------------------------------------------------------------------------------------------------------------------------------------------------------------------------------------------------------------------------------------------------------------------------------------------------------------------------------------------------------------|
|                                           |                                                                                                                           |                                                                                                                                                                                                                                                                                                                                                                                                                                                                                                                                                                                                                                   |                                                                                   |                                                                                                                                                                                           |                                                                                                                                                                                                                                                                                                                                                                                                                                                                                                                                                                                | have resulted in response bias<br>- funding not clear<br>- no information on conflict of interest                                                                                                                                                                                                                                                                                                                                                                                                                                                                                                                                                |
| 7279<br>Greene, 2020, UK<br><br>High risk | <b>Study design:</b> cross-sectional<br><b>Time of Study:</b> 27 May - 23 July 2020<br><b>Follow-up mean, range:</b> n.a. | <b>Job description:</b> Frontline health and social care workers working in a variety of healthcare roles in UK hospitals, nursing or care homes, and community settings<br>Allied healthcare: n=136,<br>Carers: n=105<br>Clinical support role: n=204<br>Doctors: n=46<br>Non-clinical staff: n=62<br>Nurses or midwives: n=504<br>Other roles: n=133<br><b>Inclusion criteria:</b> none<br><b># invited:</b> n.a. snowball technique<br><b># baseline:</b> n=1194<br><b># follow-up:</b> n.a.<br><b>Age at baseline:</b> mean 41.5 years (SD ±11.5)<br><b>% of females:</b> 92.4%<br><b>Response:</b> n.a. (convenience sample) | During COVID-19 pandemic (post-peak phase of the initial COVID-19 wave in the UK) | Feeling stigmatized for being an NHS worker: single Likert scale ranging from 0 ("not at all") to 4 ("extremely")<br><br><b>Form of stigmatization:</b><br><u>Self-stigma (perceived)</u> | <b>Prevalence of stigmatization:</b><br><br><u>Self-stigma (perceived)</u><br><br>Feeling moderately to extremely stigmatized: n=435 (36.5%)<br><br><b>Conditions increasing work-related stigmatization:</b> was not investigated<br><br><b>Measures to prevent/ deal with stigmatization at work:</b> was not investigated<br><br><b>Unfavourable health consequences associated with stigmatization:</b> Distress, PTSD, anxiety and depression. Results are shown in Tab. 2.<br><br><b>Stigmatization studied in association with return-to-work:</b> was not investigated | + approval by the UCL Ethics Committee<br>+ measurement of PTSD, depression, and anxiety with validated instruments<br>+ using logistic regression analysis in order to investigate the association between stigmatization and mental health outcomes<br><br>- recruitment procedure: convenience sample<br>- conflict of interest not reported<br>- funding not reported<br>- outcome: measurement of stigmatization with a single question<br>- no consideration of any confounders in the analysis of the association between stigmatization and mental health outcomes<br>- analysis method<br>- no investigation of a temporal relationship |

| General                                         | Study                                                                                                                       | Population                                                                                                                                                                                                                                                                                                                                                                                                                                                                                                                                                                                                                          | Exposure                                                                                           | Outcome                                                                                                                                                                                   | Results                                                                                                                                                                                                                                                                                                                                                                                                                                                                                                                                                              | Comments                                                                                                                                                                                                                                                                                                                                                                                                                                                                                                                                                                                                                                                                          |
|-------------------------------------------------|-----------------------------------------------------------------------------------------------------------------------------|-------------------------------------------------------------------------------------------------------------------------------------------------------------------------------------------------------------------------------------------------------------------------------------------------------------------------------------------------------------------------------------------------------------------------------------------------------------------------------------------------------------------------------------------------------------------------------------------------------------------------------------|----------------------------------------------------------------------------------------------------|-------------------------------------------------------------------------------------------------------------------------------------------------------------------------------------------|----------------------------------------------------------------------------------------------------------------------------------------------------------------------------------------------------------------------------------------------------------------------------------------------------------------------------------------------------------------------------------------------------------------------------------------------------------------------------------------------------------------------------------------------------------------------|-----------------------------------------------------------------------------------------------------------------------------------------------------------------------------------------------------------------------------------------------------------------------------------------------------------------------------------------------------------------------------------------------------------------------------------------------------------------------------------------------------------------------------------------------------------------------------------------------------------------------------------------------------------------------------------|
|                                                 |                                                                                                                             | <b>Loss-to-follow-up:</b> n.a.                                                                                                                                                                                                                                                                                                                                                                                                                                                                                                                                                                                                      |                                                                                                    |                                                                                                                                                                                           |                                                                                                                                                                                                                                                                                                                                                                                                                                                                                                                                                                      | possible due to the cross-sectional design                                                                                                                                                                                                                                                                                                                                                                                                                                                                                                                                                                                                                                        |
| 759<br>Juan,<br>2020,<br>China<br><br>High risk | <b>Study design:</b><br>Cross-sectional<br><b>Time of Study:</b> 1 - 14 February 2020<br><b>Follow-up mean, range:</b> n.a. | <b>Job description:</b><br>hospital staff from five national COVID-19 designated hospitals (working in isolation ward: n=96, general ward: n=360)<br>Doctors: n=195<br>Nurses: n=261<br><b>Inclusion criteria:</b><br>exclusion of those participants who had experienced insomnia or psychiatric disorders prior to COVID-19, and those who had organic diseases<br><b># invited:</b> n=500<br><b># baseline:</b> n=456<br><b># follow-up:</b> n.a.<br><b>Age at baseline:</b><br>mean 30.7 years (SD $\pm$ 7.5) (range: 17-64 years)<br><b>% of females:</b><br>70.6%<br><b>Response:</b> 91.2%<br><b>Loss-to-follow-up:</b> n.a. | During COVID-19: study period corresponds with the highest point of the COVID-19 epidemic in China | Stigmatization and rejection in neighbourhood because of hospital work: 1 item question (yes, no)<br><br><b>Form of stigmatization:</b><br><u>Self-stigma (perceived): discrimination</u> | <b>Prevalence of stigmatization:</b> was not investigated<br><br><b>Conditions increasing work-related stigmatization:</b> was not investigated<br><br><b>Measures to prevent/ deal with stigmatization at work:</b> was not investigated<br><br><b>Unfavourable health consequences associated with stigmatization:</b> Psychological reactions, obsessive-compulsive symptoms, somatization symptoms, anxiety disorder, and depression. Results are shown in Tab. 2.<br><br><b>Stigmatization studied in association with return-to-work:</b> was not investigated | + recruitment procedure: random selection of participants<br>+ high response rate<br>+ approval by the ethics committees of the third affiliated hospital<br>+ measurement of psychological impact due to stigmatization with validated instruments<br>+ analysis method: using multiple logistic regression analysis in order to investigate the association between stigmatization and rejection in neighbourhood and mental health outcomes<br>+ no conflict of interest<br>+ funding from non-profit organizations<br><br>- outcome: measurement of stigmatization with a single question<br>- no consideration of any confounders in the analysis of the association between |

| General                                           | Study                                                                                                                      | Population                                                                                                                                                                                                                                                                                                                                                                                                                                                                                                                             | Exposure                                                                        | Outcome                                                                                                                                                                                    | Results                                                                                                                                                                                                                                                                                                                                                                                                                                                                                                                                                                                                                                                                                                                                                                                                                                                                                                                                                                                                                                    | Comments                                                                                                                                                                                                                                                                                                                                                |
|---------------------------------------------------|----------------------------------------------------------------------------------------------------------------------------|----------------------------------------------------------------------------------------------------------------------------------------------------------------------------------------------------------------------------------------------------------------------------------------------------------------------------------------------------------------------------------------------------------------------------------------------------------------------------------------------------------------------------------------|---------------------------------------------------------------------------------|--------------------------------------------------------------------------------------------------------------------------------------------------------------------------------------------|--------------------------------------------------------------------------------------------------------------------------------------------------------------------------------------------------------------------------------------------------------------------------------------------------------------------------------------------------------------------------------------------------------------------------------------------------------------------------------------------------------------------------------------------------------------------------------------------------------------------------------------------------------------------------------------------------------------------------------------------------------------------------------------------------------------------------------------------------------------------------------------------------------------------------------------------------------------------------------------------------------------------------------------------|---------------------------------------------------------------------------------------------------------------------------------------------------------------------------------------------------------------------------------------------------------------------------------------------------------------------------------------------------------|
|                                                   |                                                                                                                            |                                                                                                                                                                                                                                                                                                                                                                                                                                                                                                                                        |                                                                                 |                                                                                                                                                                                            |                                                                                                                                                                                                                                                                                                                                                                                                                                                                                                                                                                                                                                                                                                                                                                                                                                                                                                                                                                                                                                            | stigmatization and rejection in neighbourhood and mental health outcomes                                                                                                                                                                                                                                                                                |
| 749<br>Khanal,<br>2020,<br>Nepal<br><br>High risk | <b>Study design:</b> Cross-sectional<br><b>Time of Study:</b> 26 April - 12 May 2020<br><b>Follow-up mean, range:</b> n.a. | <b>Job description:</b> Nurses: n=167<br>Doctors: n=161<br>Paramedics: n=81<br>Laboratory staff: n=19<br>Pharmacists: n=15<br>Public health professional: n=32<br><b>Inclusion criteria:</b> >18 years, currently working in Nepal in COVID-19 management.<br><b># invited:</b> n.r.<br><b># baseline:</b> n=501 responses received<br>n=475 analysed<br><b># follow -up:</b> n.a.<br><b>Age at baseline:</b> mean 28.2 (SD $\pm 5.8$ ) years<br><b>% of females:</b> 52.8%<br><b>Response:</b> n.r.<br><b>Loss-to-follow-up:</b> n.a. | Nationwide lockdown imposed from March 24, which continued for nearly 10 weeks. | 1 item: Stigma faced due to COVID-19 (yes, no, don't want to answer)<br><br><b>Form of stigmatization:</b><br><u>Self-stigma (perceived); discrimination, aggressive behaviour/mobbing</u> | <b>Prevalence of stigmatization:</b><br><br><u>Self-stigma (perceived):</u><br><u>Experience of stigma due to occupation from community members</u><br><ul style="list-style-type: none"> <li>• Yes: n=255 (53.7%)</li> <li>• No: n=199 (41.9%)</li> <li>• Do not want to answer: n=21 (4.4%)</li> </ul> <u>Type of major stigma experienced (n=255)</u> <ul style="list-style-type: none"> <li>• Stigmatized because of profession: n=127 (49.8%)</li> <li>• Accused of being a carrier of disease: n=102 (40.0%)</li> <li>• Threatened: n=15 (5.9%)</li> <li>• Asked to leave rented place: n=11 (4.3%)</li> </ul> <b>Conditions increasing work-related stigmatization:</b> was not investigated<br><br><b>Measures to prevent/ deal with stigmatization at work:</b> was not investigated<br><br><b>Unfavourable health consequences associated with stigmatization:</b> Anxiety, depression, and insomnia. Results are shown in Tab. 2.<br><br><b>Stigmatization studied in association with return-to-work:</b> was not investigated | +ethical approval by the Nepal Health Research Council (Reference number: 2192, 315/2020)<br>+no conflict of interests<br>+ measurement of psychological impact due to stigmatization with validated instruments<br><br>- no funding reported<br>- recruitment procedure: # invited not reported<br>- outcome: stigmatization only assessed with 1 item |
| 7269 Khanal,<br>Nepal<br>2020                     |                                                                                                                            |                                                                                                                                                                                                                                                                                                                                                                                                                                                                                                                                        |                                                                                 |                                                                                                                                                                                            | <b>Unfavourable health consequences associated with stigmatization:</b> Fear of COVID-19. Results are shown in Tab. 2.                                                                                                                                                                                                                                                                                                                                                                                                                                                                                                                                                                                                                                                                                                                                                                                                                                                                                                                     |                                                                                                                                                                                                                                                                                                                                                         |
| 7285<br>Mohindra,<br>2020,                        | <b>Study design:</b>                                                                                                       | <b>Job description:</b> Doctors: n=167<br>Nurses: n=178                                                                                                                                                                                                                                                                                                                                                                                                                                                                                | During the nationwide lockdown                                                  | Questionnaire self-developed and based on:                                                                                                                                                 | <b>Prevalence:</b><br><br><u>Self-stigma (perceived and internalized):</u>                                                                                                                                                                                                                                                                                                                                                                                                                                                                                                                                                                                                                                                                                                                                                                                                                                                                                                                                                                 | + ethical approval<br>+ questionnaire self-developed based on                                                                                                                                                                                                                                                                                           |

| General            | Study                                                                                                   | Population                                                                                                                                                                                                                                                                                                                                                                                                                                                    | Exposure                | Outcome                                                                                                                                                                                                                                                                                                                                                                                                              | Results                                                                                                                                                                                                                                                                                                                                                                                                                                                                                                                                                                                                                                                                                                                                                                                                                                                                                                                                                                                                                                                                                                                                                                                                                                                                                                                                                                                                                                                                                                                                                                                                                                                                                                                                                  | Comments                                                                                                                                                                                                                                                           |
|--------------------|---------------------------------------------------------------------------------------------------------|---------------------------------------------------------------------------------------------------------------------------------------------------------------------------------------------------------------------------------------------------------------------------------------------------------------------------------------------------------------------------------------------------------------------------------------------------------------|-------------------------|----------------------------------------------------------------------------------------------------------------------------------------------------------------------------------------------------------------------------------------------------------------------------------------------------------------------------------------------------------------------------------------------------------------------|----------------------------------------------------------------------------------------------------------------------------------------------------------------------------------------------------------------------------------------------------------------------------------------------------------------------------------------------------------------------------------------------------------------------------------------------------------------------------------------------------------------------------------------------------------------------------------------------------------------------------------------------------------------------------------------------------------------------------------------------------------------------------------------------------------------------------------------------------------------------------------------------------------------------------------------------------------------------------------------------------------------------------------------------------------------------------------------------------------------------------------------------------------------------------------------------------------------------------------------------------------------------------------------------------------------------------------------------------------------------------------------------------------------------------------------------------------------------------------------------------------------------------------------------------------------------------------------------------------------------------------------------------------------------------------------------------------------------------------------------------------|--------------------------------------------------------------------------------------------------------------------------------------------------------------------------------------------------------------------------------------------------------------------|
| India<br>High risk | Cross-sectional<br><b>Time of Study:</b><br>15 - 26 April 2020<br><b>Follow-up mean, range:</b><br>n.a. | Hospital attendants: n=109<br>Sanitation attendants: n=109<br>Other: n=12<br><b>Inclusion criteria:</b><br>any person working in the hospital<br><b># invited:</b> n.a.<br>convenience sample (invitation via WhatsApp work groups)<br><b># baseline:</b> n=574<br><b># follow -up:</b> n.a.<br><b>Age at baseline:</b><br>30.2 (SD ±6.5) years<br><b>% females:</b> 63.8%<br><b>Response:</b><br>n.a..(convenience sample)<br><b>Loss-to-follow-up:</b> n.a. | (started 25 March 2020) | - the domains of experienced changes at workplace/ hospital, neighbourhood/ community, self/ family and emotional state (McMahon et al. 2016)<br>- 19 items (open-end and multiple choice questions)<br>- piloted n=10<br><br><b>Form of stigmatization:</b><br><u>Self-stigma (perceived): stereotypes, discrimination, social exclusion, aggressive behaviour/mobbing</u><br><br><u>Self-stigma (internalized)</u> | Percentage of frequency of items of perceived change in different settings during the COVID-19 pandemic:<br><br><i>Hospital (Workplace)</i><br>My colleagues and peers: n=294<br><ul style="list-style-type: none"> <li>Try to avoid me (52.7%)</li> <li>Do not trust me and worry that I might infect them (50.7%)</li> <li>Do not sit and eat with me (31.0%)</li> </ul><br><i>Neighbourhood /Community</i><br>My neighbours: n=312<br><ul style="list-style-type: none"> <li>Try to avoid me (49.7%)</li> <li>Do not trust me and worry that I might infect them (40.7%)</li> <li>Do not sit and eat with me (28.5%)</li> <li>Have asked me or my family members to leave and not enter the neighbourhood (13.8%)</li> <li>Don't trust each other anymore (11.5%)</li> <li>Have verbally abused me or physically assaulted me or my family members (7.1%)</li> </ul><br><i>Family and home</i><br>My family members: n=137<br><ul style="list-style-type: none"> <li>Do not trust me and worry that I might infect them (32.8%)</li> <li>Try to avoid me (32.8%)</li> <li>Do not sit and eat with me (25.5%)</li> <li>Have asked me to leave or not enter my home (20.4%)</li> <li>Don't trust each other anymore (13.5%)</li> <li>Have verbally abused me or physically assaulted me (5.1%)</li> <li>My intimate partner tries to avoid me (59.1%)</li> </ul><br>At times I have felt: n=570<br><ul style="list-style-type: none"> <li>Guilty about possibly exposing family, community and peers to infection (20.9%)</li> <li>Lonely and ostracized (16.1%)</li> </ul><br><b>Conditions increasing work-related stigmatization:</b> was not investigated<br><br><b>Measures to prevent/ deal with stigmatization at work:</b> was not investigated | other questionnaires, piloted<br><br>- funding not stated<br>- conflict of interests not stated<br>- recruitment procedure: convenience sample (the link to questionnaire circulated among groups of employees via WhatsApp)<br>- confounding<br>- analysis method |

| General                                                            | Study                                                                                                                               | Population                                                                                                                                                                                                                                                                                                                                                                                                                                                        | Exposure                                                                                                                       | Outcome                                                                                                                                                                                                       | Results                                                                                                                                                                                                                                                                                                                                                                                                                                                                                                                                                                    | Comments                                                                                                                                                                                                                                                                                                                                                                                                                                                   |
|--------------------------------------------------------------------|-------------------------------------------------------------------------------------------------------------------------------------|-------------------------------------------------------------------------------------------------------------------------------------------------------------------------------------------------------------------------------------------------------------------------------------------------------------------------------------------------------------------------------------------------------------------------------------------------------------------|--------------------------------------------------------------------------------------------------------------------------------|---------------------------------------------------------------------------------------------------------------------------------------------------------------------------------------------------------------|----------------------------------------------------------------------------------------------------------------------------------------------------------------------------------------------------------------------------------------------------------------------------------------------------------------------------------------------------------------------------------------------------------------------------------------------------------------------------------------------------------------------------------------------------------------------------|------------------------------------------------------------------------------------------------------------------------------------------------------------------------------------------------------------------------------------------------------------------------------------------------------------------------------------------------------------------------------------------------------------------------------------------------------------|
|                                                                    |                                                                                                                                     |                                                                                                                                                                                                                                                                                                                                                                                                                                                                   |                                                                                                                                |                                                                                                                                                                                                               | <p><b>Unfavourable health consequences associated with stigmatization:</b> was not investigated</p> <p><b>Stigmatization studied in association with return-to-work:</b> was not investigated</p>                                                                                                                                                                                                                                                                                                                                                                          |                                                                                                                                                                                                                                                                                                                                                                                                                                                            |
| <p>948<br/>Monterrossa-Castro, 2020, Colombia</p> <p>High risk</p> | <p><b>Study Design:</b> Cross-sectional</p> <p><b>Time of study:</b> 1 - 5 April 2020</p> <p><b>Follow-up mean, range:</b> n.a.</p> | <p><b>Job description:</b> General practitioners</p> <p><b>Inclusion criteria:</b> General practitioners who treated patients of any sex, age, or type of pathology or health condition</p> <p><b># invited:</b> n.r.</p> <p><b># baseline:</b> N=531 analysed</p> <p><b># follow -up:</b> n.a.</p> <p><b>Age at baseline:</b> mean 33.0 (SD ±9.3) years</p> <p><b>% of females:</b> 59.5%</p> <p><b>Response:</b> n.r.</p> <p><b>Loss-to-follow-up:</b> n.a.</p> | <p>Responses to “the 24–30 March period, when the country was in a health emergency, in the initial phase of containment”.</p> | <p>Social discrimination for working as a general practitioner (questions not described)</p> <p><b>Forms of stigmatization:</b><br/><u>Self-Stigma (perceived): discrimination</u></p>                        | <p><b>Prevalence of stigmatization:</b><br/><u>Self-stigma (perceived)</u><br/>Social discrimination for working as a general practitioner: n = 207 (38.9%)</p> <p><b>Conditions increasing work-related stigmatization:</b><br/>was not investigated</p> <p><b>Measures to prevent/ deal with stigmatization at work:</b><br/>was not investigated</p> <p><b>Unfavourable health consequences associated with stigmatization:</b> anxiety. Results are shown in Tab. 2.</p> <p><b>Stigmatization studied in association with return-to-work:</b> was not investigated</p> | <p>+ ethical approval by the University of Cartagena (Act 064–2019 and Resolution 01 430–2019)</p> <p>+ Conflict of interest stated</p> <p>+ Funding stated (none)</p> <p>+ outcome: measurement of psychological impact due to stigmatization with validated instruments</p> <p>- no description of social discrimination for working as a general practitioner</p> <p>- recruitment procedure; no description of recruitment, # invited not reported</p> |
| <p>7261<br/>Ramaci, Italy, 2020</p> <p>High risk</p>               | <p><b>Study design:</b> Cross-sectional</p> <p><b>Time of Study:</b> 17 - 26 March</p>                                              | <p><b>Job description:</b> Nurses: n=67<br/>Doctors: n=206</p> <p><b>Inclusion criteria:</b> none</p> <p><b># invited:</b> n.a. (convenience sample)</p> <p><b># baseline:</b> n=273</p>                                                                                                                                                                                                                                                                          | <p>During COVID-19 pandemic: national lockdown (17 March - 2 April)</p>                                                        | <p>“Stigma discrimination”</p> <p>“Stigma fear”: no description of definition included; adapted from See et al. 2011 (answer options: 0 = strongly disagree, 1 = disagree, 2 = agree, 3 = strongly agree)</p> | <p><b>Prevalence of stigmatization:</b></p> <p><u>Self-stigma (perceived):</u><br/>Males: 1.57 (SD 0.70)<br/>Females: 1.45 (SD 0.66)</p> <p><u>Self-stigma (anticipated):</u><br/>Males: 3.07 (SD 0.71)<br/>Females: 3.10 (SD 0.97)</p>                                                                                                                                                                                                                                                                                                                                    | <p>+ no conflict of interest</p> <p>+ Funding stated (none)</p> <p>+ outcome: measurement of psychological impact due to stigmatization</p>                                                                                                                                                                                                                                                                                                                |

| General                                 | Study                                                                                                                                      | Population                                                                                                                                                                                                                                                                                                                                                                                                                                              | Exposure                                 | Outcome                                                                                                                                                                                                                                                                                                                                                                                                                                                                                                                                     | Results                                                                                                                                                                                                                                                                                                                                                                                                                                                                                                                                                                                                                                                                                                                                                                                                                                                                                                                              | Comments                                                                                                                                                                           |            |                  |                                  |                      |                     |                     |                     |                                |                     |                     |                     |                                   |                     |                     |                     |                                                                                                                                                                                                                                                                                                                                                                                                                            |
|-----------------------------------------|--------------------------------------------------------------------------------------------------------------------------------------------|---------------------------------------------------------------------------------------------------------------------------------------------------------------------------------------------------------------------------------------------------------------------------------------------------------------------------------------------------------------------------------------------------------------------------------------------------------|------------------------------------------|---------------------------------------------------------------------------------------------------------------------------------------------------------------------------------------------------------------------------------------------------------------------------------------------------------------------------------------------------------------------------------------------------------------------------------------------------------------------------------------------------------------------------------------------|--------------------------------------------------------------------------------------------------------------------------------------------------------------------------------------------------------------------------------------------------------------------------------------------------------------------------------------------------------------------------------------------------------------------------------------------------------------------------------------------------------------------------------------------------------------------------------------------------------------------------------------------------------------------------------------------------------------------------------------------------------------------------------------------------------------------------------------------------------------------------------------------------------------------------------------|------------------------------------------------------------------------------------------------------------------------------------------------------------------------------------|------------|------------------|----------------------------------|----------------------|---------------------|---------------------|---------------------|--------------------------------|---------------------|---------------------|---------------------|-----------------------------------|---------------------|---------------------|---------------------|----------------------------------------------------------------------------------------------------------------------------------------------------------------------------------------------------------------------------------------------------------------------------------------------------------------------------------------------------------------------------------------------------------------------------|
|                                         | <b>Follow-up mean, range:</b> n.a.                                                                                                         | <b># follow-up:</b> n.a.<br><b>Age at baseline:</b> 46.7 years (SD ±8.4)<br><b>% of females:</b> 50.2%<br><b>Response:</b> n.a. (convenience sample)<br><b>Loss-to-follow-up:</b> n.a.                                                                                                                                                                                                                                                                  |                                          | <b>Form of stigmatization:</b><br><u>Self-stigma (perceived): discrimination</u><br><br><u>Self-stigma (anticipated)</u>                                                                                                                                                                                                                                                                                                                                                                                                                    | <b>Conditions increasing work-related stigmatization:</b> was not investigated<br><br><b>Measures to prevent/ deal with stigmatization at work:</b> was not investigated<br><br><b>Unfavourable health consequences associated with stigmatization:</b> compassion fatigue, compassion satisfaction, and risk of burnout. Results are shown in Tab. 2.<br><br><b>Stigmatization studied in association with return-to-work:</b> was not investigated                                                                                                                                                                                                                                                                                                                                                                                                                                                                                 | with validated instruments<br><br>- recruitment procedure: convenience sample<br>- outcome: no description of how stigmatization was measured<br>- confounding: age not considered |            |                  |                                  |                      |                     |                     |                     |                                |                     |                     |                     |                                   |                     |                     |                     |                                                                                                                                                                                                                                                                                                                                                                                                                            |
| 7130 Said, Egypt, 2021<br><br>High risk | <b>Study design:</b> Cross-sectional (comparative study)<br><b>Time of Study:</b> 10 - 24 April 2020<br><b>Follow-up mean, range:</b> n.a. | <b>Job description:</b><br>A) Nurses from triage hospital (ZFH);<br>B) Nurses from a hospital with no triage or isolation form (ZGH)<br><b>Inclusion criteria:</b><br>All on-job nurses (excluding: pregnant women and nurses on extended leave > 6 weeks)<br><b># invited:</b><br>convenience sample: invitation through online work group on “WhatsApp” and “Facebook”; online questionnaire (Google Form App); stopped when sample size was achieved | During COVID-19 pandemic (not specified) | Stigma: 2 items (derived from US National Centre for Posttraumatic Stress Disorder 2020 and “MERS-CoV staff questionnaire” Khalid et al. 2016<br><br>1.“Others’ fear of contact with those treating patients with COVID-19”<br>2.“Developing self-stigma about voicing needs and fears (score range 0-8)”<br><br><b>Form of stigmatization:</b><br><u>Self-stigma (perceived): discrimination</u><br>“Others’ fear of contact with those treating patients with COVID-19”,<br><u>Self-stigma (internalized):</u><br>“Developing self-stigma | <b>Prevalence of stigmatization:</b><br><br><u>Self-stigma (perceived and anticipated)</u><br><br>ZFH group: n=190 (90.5%)<br>ZGH group: n=42 (20%)<br><br>Tab.S1: Subscale of specific COVID-19 associated stressors<br><table><tr><td></td><td><u>ZFH</u></td><td><u>ZGH group</u></td><td><u>Difference between groups</u></td></tr><tr><td><u>Stigma (both)</u></td><td><u>7.9 (SD 1.4)</u></td><td><u>6.6 (SD 1.1)</u></td><td><u>p &lt; 0.001</u></td></tr><tr><td><u>Self-stigma (perceived)</u></td><td><u>4.1 (SD 0.8)</u></td><td><u>3.4 (SD 0.7)</u></td><td><u>p &lt; 0.001</u></td></tr><tr><td><u>Self-stigma (internalized)</u></td><td><u>3.8 (SD 0.8)</u></td><td><u>3.2 (SD 0.8)</u></td><td><u>p &lt; 0.001</u></td></tr></table><br><br><b>Conditions increasing work-related stigmatization:</b> was not investigated<br><br><b>Measures to prevent/ deal with stigmatization at work:</b> was not investigated |                                                                                                                                                                                    | <u>ZFH</u> | <u>ZGH group</u> | <u>Difference between groups</u> | <u>Stigma (both)</u> | <u>7.9 (SD 1.4)</u> | <u>6.6 (SD 1.1)</u> | <u>p &lt; 0.001</u> | <u>Self-stigma (perceived)</u> | <u>4.1 (SD 0.8)</u> | <u>3.4 (SD 0.7)</u> | <u>p &lt; 0.001</u> | <u>Self-stigma (internalized)</u> | <u>3.8 (SD 0.8)</u> | <u>3.2 (SD 0.8)</u> | <u>p &lt; 0.001</u> | + ethic approval from university ethics committee<br>+ no conflict of interest<br>+ sample size calculation<br>+ pilot study for testing (n=40) questionnaire and feasibility of study (results not included)<br><br>- recruitment procedure: convenience sample<br>- outcome measured with 2 items (not validated)<br>- confounding: effect of age not considered<br>- analysis method: only basic statistical evaluation |
|                                         | <u>ZFH</u>                                                                                                                                 | <u>ZGH group</u>                                                                                                                                                                                                                                                                                                                                                                                                                                        | <u>Difference between groups</u>         |                                                                                                                                                                                                                                                                                                                                                                                                                                                                                                                                             |                                                                                                                                                                                                                                                                                                                                                                                                                                                                                                                                                                                                                                                                                                                                                                                                                                                                                                                                      |                                                                                                                                                                                    |            |                  |                                  |                      |                     |                     |                     |                                |                     |                     |                     |                                   |                     |                     |                     |                                                                                                                                                                                                                                                                                                                                                                                                                            |
| <u>Stigma (both)</u>                    | <u>7.9 (SD 1.4)</u>                                                                                                                        | <u>6.6 (SD 1.1)</u>                                                                                                                                                                                                                                                                                                                                                                                                                                     | <u>p &lt; 0.001</u>                      |                                                                                                                                                                                                                                                                                                                                                                                                                                                                                                                                             |                                                                                                                                                                                                                                                                                                                                                                                                                                                                                                                                                                                                                                                                                                                                                                                                                                                                                                                                      |                                                                                                                                                                                    |            |                  |                                  |                      |                     |                     |                     |                                |                     |                     |                     |                                   |                     |                     |                     |                                                                                                                                                                                                                                                                                                                                                                                                                            |
| <u>Self-stigma (perceived)</u>          | <u>4.1 (SD 0.8)</u>                                                                                                                        | <u>3.4 (SD 0.7)</u>                                                                                                                                                                                                                                                                                                                                                                                                                                     | <u>p &lt; 0.001</u>                      |                                                                                                                                                                                                                                                                                                                                                                                                                                                                                                                                             |                                                                                                                                                                                                                                                                                                                                                                                                                                                                                                                                                                                                                                                                                                                                                                                                                                                                                                                                      |                                                                                                                                                                                    |            |                  |                                  |                      |                     |                     |                     |                                |                     |                     |                     |                                   |                     |                     |                     |                                                                                                                                                                                                                                                                                                                                                                                                                            |
| <u>Self-stigma (internalized)</u>       | <u>3.8 (SD 0.8)</u>                                                                                                                        | <u>3.2 (SD 0.8)</u>                                                                                                                                                                                                                                                                                                                                                                                                                                     | <u>p &lt; 0.001</u>                      |                                                                                                                                                                                                                                                                                                                                                                                                                                                                                                                                             |                                                                                                                                                                                                                                                                                                                                                                                                                                                                                                                                                                                                                                                                                                                                                                                                                                                                                                                                      |                                                                                                                                                                                    |            |                  |                                  |                      |                     |                     |                     |                                |                     |                     |                     |                                   |                     |                     |                     |                                                                                                                                                                                                                                                                                                                                                                                                                            |



| General                                       | Study                                                                                                                     | Population                                                                                                                                                                                                                                                                                                                                                                                                                    | Exposure                                 | Outcome                                                                                                                | Results                                                                                                                                                                                                                                                                                                                                                                                                                                                                                                                                                                                                                                                                                                                                                                                                                                                                                       | Comments                 |   |              |    |        |    |                    |    |                            |    |                       |    |       |    |                                                                                                                                                                                                                                                                                                                                                                                                                                                |
|-----------------------------------------------|---------------------------------------------------------------------------------------------------------------------------|-------------------------------------------------------------------------------------------------------------------------------------------------------------------------------------------------------------------------------------------------------------------------------------------------------------------------------------------------------------------------------------------------------------------------------|------------------------------------------|------------------------------------------------------------------------------------------------------------------------|-----------------------------------------------------------------------------------------------------------------------------------------------------------------------------------------------------------------------------------------------------------------------------------------------------------------------------------------------------------------------------------------------------------------------------------------------------------------------------------------------------------------------------------------------------------------------------------------------------------------------------------------------------------------------------------------------------------------------------------------------------------------------------------------------------------------------------------------------------------------------------------------------|--------------------------|---|--------------|----|--------|----|--------------------|----|----------------------------|----|-----------------------|----|-------|----|------------------------------------------------------------------------------------------------------------------------------------------------------------------------------------------------------------------------------------------------------------------------------------------------------------------------------------------------------------------------------------------------------------------------------------------------|
|                                               |                                                                                                                           | <b># baseline:</b> n=420<br>ZFH n=210<br>ZGH n=210<br><b># follow-up:</b> n.a.<br><b>Age at baseline:</b><br>ZFH: 24.2 years<br>(SD ±5.2)<br>ZGH: 26.1 years<br>(SD ±4.5)<br><b>% of females:</b><br>100%<br><b>Response:</b> n.a.<br>(convenience sample)<br><b>Loss-to-follow-up:</b> n.a.                                                                                                                                  |                                          | about voicing needs and fears”                                                                                         | <b>Unfavourable health consequences associated with stigmatization:</b> was not investigated<br><br><b>Stigmatization studied in association with return-to-work:</b> was not investigated                                                                                                                                                                                                                                                                                                                                                                                                                                                                                                                                                                                                                                                                                                    |                          |   |              |    |        |    |                    |    |                            |    |                       |    |       |    |                                                                                                                                                                                                                                                                                                                                                                                                                                                |
| 832<br>Sharma<br>2020,<br>US<br><br>High risk | <b>Study design:</b> Cross-sectional<br><b>Time of Study:</b> 23 April - 7 May 2020<br><b>Follow-up mean, range:</b> n.a. | <b>Job description:</b> Healthcare professionals caring for COVID-19 patients (intensive care unit (ICU) providers)<br>Physicians: 25%<br>Nurses: 47%<br>Respiratory therapists: 17%<br>Advanced practice providers (nurse practitioners, physician assistants, and certified registered nurse anaesthetists): 11%<br><b>Inclusion criteria:</b> caring for COVID-19 patients<br><b># invited:</b> n.a.<br>snowball technique | During COVID-19 pandemic (not specified) | Stigma from community: instrument not reported<br><br><b>Form of stigmatization:</b><br><u>Self-stigma (perceived)</u> | <b>Prevalence of stigmatization:</b><br><br><u>Self-stigma (perceived)</u><br><br>Figure 2 and Table 2: Stigma from the community <table><tr><th>Health care professional</th><th>%</th></tr><tr><td>Total sample</td><td>26</td></tr><tr><td>Doctor</td><td>11</td></tr><tr><td>Doctor in training</td><td>18</td></tr><tr><td>Advanced practice provider</td><td>19</td></tr><tr><td>Respiratory therapist</td><td>29</td></tr><tr><td>Nurse</td><td>33</td></tr></table><br><b>Conditions increasing work-related stigmatization:</b> was not investigated<br><br><b>Measures to prevent/ deal with stigmatization at work:</b> was not investigated<br><br><b>Unfavourable health consequences associated with stigmatization:</b> Emotional distress/burnout. Results are shown in Tab. 2.<br><br><b>Stigmatization studied in association with return-to-work:</b> was not investigated | Health care professional | % | Total sample | 26 | Doctor | 11 | Doctor in training | 18 | Advanced practice provider | 19 | Respiratory therapist | 29 | Nurse | 33 | + study followed STROBE guidelines for the reporting of cross-sectional studies<br>+ ethical approval by the University of Washington Institutional Review Board<br>+ outcome: design of the questionnaire by a research team of physicians, nurses, respiratory therapists, and advanced practice providers<br>+ pilot-testing of the questionnaire by other healthcare professionals<br>+ no conflict of interest<br>+ funding stated (none) |
| Health care professional                      | %                                                                                                                         |                                                                                                                                                                                                                                                                                                                                                                                                                               |                                          |                                                                                                                        |                                                                                                                                                                                                                                                                                                                                                                                                                                                                                                                                                                                                                                                                                                                                                                                                                                                                                               |                          |   |              |    |        |    |                    |    |                            |    |                       |    |       |    |                                                                                                                                                                                                                                                                                                                                                                                                                                                |
| Total sample                                  | 26                                                                                                                        |                                                                                                                                                                                                                                                                                                                                                                                                                               |                                          |                                                                                                                        |                                                                                                                                                                                                                                                                                                                                                                                                                                                                                                                                                                                                                                                                                                                                                                                                                                                                                               |                          |   |              |    |        |    |                    |    |                            |    |                       |    |       |    |                                                                                                                                                                                                                                                                                                                                                                                                                                                |
| Doctor                                        | 11                                                                                                                        |                                                                                                                                                                                                                                                                                                                                                                                                                               |                                          |                                                                                                                        |                                                                                                                                                                                                                                                                                                                                                                                                                                                                                                                                                                                                                                                                                                                                                                                                                                                                                               |                          |   |              |    |        |    |                    |    |                            |    |                       |    |       |    |                                                                                                                                                                                                                                                                                                                                                                                                                                                |
| Doctor in training                            | 18                                                                                                                        |                                                                                                                                                                                                                                                                                                                                                                                                                               |                                          |                                                                                                                        |                                                                                                                                                                                                                                                                                                                                                                                                                                                                                                                                                                                                                                                                                                                                                                                                                                                                                               |                          |   |              |    |        |    |                    |    |                            |    |                       |    |       |    |                                                                                                                                                                                                                                                                                                                                                                                                                                                |
| Advanced practice provider                    | 19                                                                                                                        |                                                                                                                                                                                                                                                                                                                                                                                                                               |                                          |                                                                                                                        |                                                                                                                                                                                                                                                                                                                                                                                                                                                                                                                                                                                                                                                                                                                                                                                                                                                                                               |                          |   |              |    |        |    |                    |    |                            |    |                       |    |       |    |                                                                                                                                                                                                                                                                                                                                                                                                                                                |
| Respiratory therapist                         | 29                                                                                                                        |                                                                                                                                                                                                                                                                                                                                                                                                                               |                                          |                                                                                                                        |                                                                                                                                                                                                                                                                                                                                                                                                                                                                                                                                                                                                                                                                                                                                                                                                                                                                                               |                          |   |              |    |        |    |                    |    |                            |    |                       |    |       |    |                                                                                                                                                                                                                                                                                                                                                                                                                                                |
| Nurse                                         | 33                                                                                                                        |                                                                                                                                                                                                                                                                                                                                                                                                                               |                                          |                                                                                                                        |                                                                                                                                                                                                                                                                                                                                                                                                                                                                                                                                                                                                                                                                                                                                                                                                                                                                                               |                          |   |              |    |        |    |                    |    |                            |    |                       |    |       |    |                                                                                                                                                                                                                                                                                                                                                                                                                                                |

| General                                   | Study                                                                                                | Population                                                                                                                                                                                                                                                                                                                                                                                                                                                                       | Exposure                                                                                                                                          | Outcome                                                                                                                                                                                                                              | Results                                                                                                                                                                                                                                                                                                                                                                                                                                                                                                                                                                                                                                                                                                                                                                                                                                                                                                                                                                                                                                                                            | Comments                                                                                                                                                                                      |                         |                                     |                                        |   |                   |             |             |             |       |                     |           |           |          |                         |           |           |          |                        |          |          |          |                             |          |          |          |                                                                                                                                                                                                                                                                                                                                                                                                                                                                                   |
|-------------------------------------------|------------------------------------------------------------------------------------------------------|----------------------------------------------------------------------------------------------------------------------------------------------------------------------------------------------------------------------------------------------------------------------------------------------------------------------------------------------------------------------------------------------------------------------------------------------------------------------------------|---------------------------------------------------------------------------------------------------------------------------------------------------|--------------------------------------------------------------------------------------------------------------------------------------------------------------------------------------------------------------------------------------|------------------------------------------------------------------------------------------------------------------------------------------------------------------------------------------------------------------------------------------------------------------------------------------------------------------------------------------------------------------------------------------------------------------------------------------------------------------------------------------------------------------------------------------------------------------------------------------------------------------------------------------------------------------------------------------------------------------------------------------------------------------------------------------------------------------------------------------------------------------------------------------------------------------------------------------------------------------------------------------------------------------------------------------------------------------------------------|-----------------------------------------------------------------------------------------------------------------------------------------------------------------------------------------------|-------------------------|-------------------------------------|----------------------------------------|---|-------------------|-------------|-------------|-------------|-------|---------------------|-----------|-----------|----------|-------------------------|-----------|-----------|----------|------------------------|----------|----------|----------|-----------------------------|----------|----------|----------|-----------------------------------------------------------------------------------------------------------------------------------------------------------------------------------------------------------------------------------------------------------------------------------------------------------------------------------------------------------------------------------------------------------------------------------------------------------------------------------|
|                                           |                                                                                                      | # baseline: n = 1651<br># follow-up: n.a.<br>Age at baseline: n.r.<br>% of females: 74%<br>Response: n.a. (convenience sample)<br>Loss-to-follow-up: n.a.                                                                                                                                                                                                                                                                                                                        |                                                                                                                                                   |                                                                                                                                                                                                                                      |                                                                                                                                                                                                                                                                                                                                                                                                                                                                                                                                                                                                                                                                                                                                                                                                                                                                                                                                                                                                                                                                                    | - recruitment procedure: convenience sample<br>- outcome: instruments used to measure stigmatization and burnout not reported<br>- confounding factors were not reported<br>- analysis method |                         |                                     |                                        |   |                   |             |             |             |       |                     |           |           |          |                         |           |           |          |                        |          |          |          |                             |          |          |          |                                                                                                                                                                                                                                                                                                                                                                                                                                                                                   |
| 7262<br>Tan, 2020, China<br><br>High risk | Study design: Cross-sectional<br>Time of Study: 24 - 25 February 2020<br>Follow-up mean, range: n.a. | Job description: Members of the workforce who returned to work: Workers, and technical staff: 81.1% Executives, sales and marketing, management and others: 18.1%<br>Inclusion criteria: Members of the workforce, living in Chongqing, full-time employees, exclusion of health care workers, presence of severe psychiatric illnesses (e.g. schizophrenia, bipolar disorder, dementia), life-threatening medical conditions including severe stroke or life-threatening cancer | Returning to work after lockdown and quarantine in Chongqing, during the peak of the COVID-19 epidemic when strict infection control was in place | Experience of discrimination during COVID-19 epidemic: measured with a single-item (answer options: no, mild, moderate, serious, very serious discrimination)<br><br>Form of stigmatization: Self-stigma (perceived): discrimination | Prevalence of stigmatization:<br><br>Self-stigma (perceived)<br><br>Tab.2: Experience of discrimination during COVID-19 epidemic <table><tr><td></td><td>All respondents (n=673)</td><td>Workers and technical staff (n=551)</td><td>Management and executive staff (n=122)</td><td>p</td></tr><tr><td>No discrimination</td><td>629 (93.5%)</td><td>511 (92.7%)</td><td>118 (96.7%)</td><td rowspan="5">0.435</td></tr><tr><td>Mild discrimination</td><td>24 (3.6%)</td><td>21 (3.8%)</td><td>3 (2.5%)</td></tr><tr><td>Moderate discrimination</td><td>10 (1.5%)</td><td>10 (1.8%)</td><td>0 (0.0%)</td></tr><tr><td>Serious discrimination</td><td>6 (0.9%)</td><td>5 (0.9%)</td><td>1 (0.8%)</td></tr><tr><td>Very serious discrimination</td><td>4 (0.6%)</td><td>4 (0.7%)</td><td>0 (0.0%)</td></tr></table><br><br>Conditions increasing work-related stigmatization: was not investigated<br><br>Measures to prevent/ deal with stigmatization at work: was not investigated<br><br>Unfavourable health consequences associated with stigmatization: was not investigated |                                                                                                                                                                                               | All respondents (n=673) | Workers and technical staff (n=551) | Management and executive staff (n=122) | p | No discrimination | 629 (93.5%) | 511 (92.7%) | 118 (96.7%) | 0.435 | Mild discrimination | 24 (3.6%) | 21 (3.8%) | 3 (2.5%) | Moderate discrimination | 10 (1.5%) | 10 (1.8%) | 0 (0.0%) | Serious discrimination | 6 (0.9%) | 5 (0.9%) | 1 (0.8%) | Very serious discrimination | 4 (0.6%) | 4 (0.7%) | 0 (0.0%) | + ethical approval by the Institutional Review Board of the China-Singapore (Chongqing) Demonstration Initiative on Strategic Connectivity Think Tank<br>+ no competing Interest<br><br>- only few information on the recruitment procedure (recruitment of participants through companies)<br>- exposure measurement with a single item-question<br>- confounders (for stigma analysis)<br>- analysis method (for stigma outcome)<br><br>Funding by public institutions and by a |
|                                           | All respondents (n=673)                                                                              | Workers and technical staff (n=551)                                                                                                                                                                                                                                                                                                                                                                                                                                              | Management and executive staff (n=122)                                                                                                            | p                                                                                                                                                                                                                                    |                                                                                                                                                                                                                                                                                                                                                                                                                                                                                                                                                                                                                                                                                                                                                                                                                                                                                                                                                                                                                                                                                    |                                                                                                                                                                                               |                         |                                     |                                        |   |                   |             |             |             |       |                     |           |           |          |                         |           |           |          |                        |          |          |          |                             |          |          |          |                                                                                                                                                                                                                                                                                                                                                                                                                                                                                   |
| No discrimination                         | 629 (93.5%)                                                                                          | 511 (92.7%)                                                                                                                                                                                                                                                                                                                                                                                                                                                                      | 118 (96.7%)                                                                                                                                       | 0.435                                                                                                                                                                                                                                |                                                                                                                                                                                                                                                                                                                                                                                                                                                                                                                                                                                                                                                                                                                                                                                                                                                                                                                                                                                                                                                                                    |                                                                                                                                                                                               |                         |                                     |                                        |   |                   |             |             |             |       |                     |           |           |          |                         |           |           |          |                        |          |          |          |                             |          |          |          |                                                                                                                                                                                                                                                                                                                                                                                                                                                                                   |
| Mild discrimination                       | 24 (3.6%)                                                                                            | 21 (3.8%)                                                                                                                                                                                                                                                                                                                                                                                                                                                                        | 3 (2.5%)                                                                                                                                          |                                                                                                                                                                                                                                      |                                                                                                                                                                                                                                                                                                                                                                                                                                                                                                                                                                                                                                                                                                                                                                                                                                                                                                                                                                                                                                                                                    |                                                                                                                                                                                               |                         |                                     |                                        |   |                   |             |             |             |       |                     |           |           |          |                         |           |           |          |                        |          |          |          |                             |          |          |          |                                                                                                                                                                                                                                                                                                                                                                                                                                                                                   |
| Moderate discrimination                   | 10 (1.5%)                                                                                            | 10 (1.8%)                                                                                                                                                                                                                                                                                                                                                                                                                                                                        | 0 (0.0%)                                                                                                                                          |                                                                                                                                                                                                                                      |                                                                                                                                                                                                                                                                                                                                                                                                                                                                                                                                                                                                                                                                                                                                                                                                                                                                                                                                                                                                                                                                                    |                                                                                                                                                                                               |                         |                                     |                                        |   |                   |             |             |             |       |                     |           |           |          |                         |           |           |          |                        |          |          |          |                             |          |          |          |                                                                                                                                                                                                                                                                                                                                                                                                                                                                                   |
| Serious discrimination                    | 6 (0.9%)                                                                                             | 5 (0.9%)                                                                                                                                                                                                                                                                                                                                                                                                                                                                         | 1 (0.8%)                                                                                                                                          |                                                                                                                                                                                                                                      |                                                                                                                                                                                                                                                                                                                                                                                                                                                                                                                                                                                                                                                                                                                                                                                                                                                                                                                                                                                                                                                                                    |                                                                                                                                                                                               |                         |                                     |                                        |   |                   |             |             |             |       |                     |           |           |          |                         |           |           |          |                        |          |          |          |                             |          |          |          |                                                                                                                                                                                                                                                                                                                                                                                                                                                                                   |
| Very serious discrimination               | 4 (0.6%)                                                                                             | 4 (0.7%)                                                                                                                                                                                                                                                                                                                                                                                                                                                                         | 0 (0.0%)                                                                                                                                          |                                                                                                                                                                                                                                      |                                                                                                                                                                                                                                                                                                                                                                                                                                                                                                                                                                                                                                                                                                                                                                                                                                                                                                                                                                                                                                                                                    |                                                                                                                                                                                               |                         |                                     |                                        |   |                   |             |             |             |       |                     |           |           |          |                         |           |           |          |                        |          |          |          |                             |          |          |          |                                                                                                                                                                                                                                                                                                                                                                                                                                                                                   |

| General                                                                         | Study                                                                                       | Population                                                                                                                                                                                                                                                                                                                                      | Exposure                                 | Outcome                                                                                                                                                                                                                                                                                        | Results                                                                                                                                                                                                                                                                                                                                                                                                                                                                                                                                                                                                                                                                                                                                                                         | Comments                            |                                       |                                         |                                                                      |    |    |                                                                                 |    |    |                                                                   |    |    |                                                                      |    |    |                                                                                                                                                                                                                                                                                                                                                                                                                                              |
|---------------------------------------------------------------------------------|---------------------------------------------------------------------------------------------|-------------------------------------------------------------------------------------------------------------------------------------------------------------------------------------------------------------------------------------------------------------------------------------------------------------------------------------------------|------------------------------------------|------------------------------------------------------------------------------------------------------------------------------------------------------------------------------------------------------------------------------------------------------------------------------------------------|---------------------------------------------------------------------------------------------------------------------------------------------------------------------------------------------------------------------------------------------------------------------------------------------------------------------------------------------------------------------------------------------------------------------------------------------------------------------------------------------------------------------------------------------------------------------------------------------------------------------------------------------------------------------------------------------------------------------------------------------------------------------------------|-------------------------------------|---------------------------------------|-----------------------------------------|----------------------------------------------------------------------|----|----|---------------------------------------------------------------------------------|----|----|-------------------------------------------------------------------|----|----|----------------------------------------------------------------------|----|----|----------------------------------------------------------------------------------------------------------------------------------------------------------------------------------------------------------------------------------------------------------------------------------------------------------------------------------------------------------------------------------------------------------------------------------------------|
|                                                                                 |                                                                                             | and suspected or confirmed cases of COVID-19 that prevented an employee from full-time employment<br># invited: n=1323<br># baseline: n=673<br># follow -up: n.a.<br>Age at baseline: mean: 30.8 years (SD ±7.4)<br>% of females: 25.6%<br>Response: 50.9%<br>Loss-to-follow-up: n.a.                                                           |                                          |                                                                                                                                                                                                                                                                                                | Stigmatization studied in association with return-to-work: yes                                                                                                                                                                                                                                                                                                                                                                                                                                                                                                                                                                                                                                                                                                                  | foundation of a joint stock company |                                       |                                         |                                                                      |    |    |                                                                                 |    |    |                                                                   |    |    |                                                                      |    |    |                                                                                                                                                                                                                                                                                                                                                                                                                                              |
| 851 Taylor, 2020, USA, Canada<br><br>High risk                                  | Study design: Cross-sectional<br>Time of Study: 6-19 May 2020<br>Follow-up mean, range: n.a | Job description: Non-HCWs from the United States and Canada : 92 % employed full- or part-time.<br>Inclusion criteria: none<br># invited: n.r.<br># baseline: N=3551<br>n=1716 from the USA<br>n=1835 from Canada<br># follow -up: n.a.<br>Age at baseline: mean 54 (SD ±15) years<br>% of females: 42%<br>Response: n.r.<br>Loss-to-follow-up: | During COVID-19 pandemic (not specified) | Attitudes from the general population towards HCWs<br><br>HCW Stigmatization Survey: self-developed, 8 items, 5-point scale (0=strongly disagree, 4=strongly agree), excellent reliability<br><br>Forms of stigmatization: <u>Public Stigma: stereotypes, discrimination, social exclusion</u> | Prevalence of stigmatization:<br><br><u>Public Stigma:</u><br><br>Tab. 2: Stigmatizing attitudes from (1) total respondents and from (2) people who clapped or cheered for HCWs (n=623) <table><tr><td></td><td>(1) % agree or strongly agree (total)</td><td>(2) % agree or strongly agree (clapped)</td></tr><tr><td>Healthcare workers who work in hospitals are likely to have COVID-19</td><td>32</td><td>39</td></tr><tr><td>For the safety of the community, healthcare workers should not go out in public</td><td>25</td><td>28</td></tr><tr><td>Healthcare workers should have some restrictions on their freedom</td><td>26</td><td>29</td></tr><tr><td>Healthcare workers who treat people with COVID-19 should be isolated</td><td>36</td><td>39</td></tr></table> |                                     | (1) % agree or strongly agree (total) | (2) % agree or strongly agree (clapped) | Healthcare workers who work in hospitals are likely to have COVID-19 | 32 | 39 | For the safety of the community, healthcare workers should not go out in public | 25 | 28 | Healthcare workers should have some restrictions on their freedom | 26 | 29 | Healthcare workers who treat people with COVID-19 should be isolated | 36 | 39 | + funding from: Canadian Institutes of Health Research (#439751) and the University of Regina<br>+ outcome: Validation of self-developed instrument<br>+ measurement of psychological impact due to stigmatization with validated instruments<br>+ declaration of competing interests (support by non-profit organizations and journals)<br><br>- no ethical approval (but written informed consent)<br>- recruitment and sampling technique |
|                                                                                 | (1) % agree or strongly agree (total)                                                       | (2) % agree or strongly agree (clapped)                                                                                                                                                                                                                                                                                                         |                                          |                                                                                                                                                                                                                                                                                                |                                                                                                                                                                                                                                                                                                                                                                                                                                                                                                                                                                                                                                                                                                                                                                                 |                                     |                                       |                                         |                                                                      |    |    |                                                                                 |    |    |                                                                   |    |    |                                                                      |    |    |                                                                                                                                                                                                                                                                                                                                                                                                                                              |
| Healthcare workers who work in hospitals are likely to have COVID-19            | 32                                                                                          | 39                                                                                                                                                                                                                                                                                                                                              |                                          |                                                                                                                                                                                                                                                                                                |                                                                                                                                                                                                                                                                                                                                                                                                                                                                                                                                                                                                                                                                                                                                                                                 |                                     |                                       |                                         |                                                                      |    |    |                                                                                 |    |    |                                                                   |    |    |                                                                      |    |    |                                                                                                                                                                                                                                                                                                                                                                                                                                              |
| For the safety of the community, healthcare workers should not go out in public | 25                                                                                          | 28                                                                                                                                                                                                                                                                                                                                              |                                          |                                                                                                                                                                                                                                                                                                |                                                                                                                                                                                                                                                                                                                                                                                                                                                                                                                                                                                                                                                                                                                                                                                 |                                     |                                       |                                         |                                                                      |    |    |                                                                                 |    |    |                                                                   |    |    |                                                                      |    |    |                                                                                                                                                                                                                                                                                                                                                                                                                                              |
| Healthcare workers should have some restrictions on their freedom               | 26                                                                                          | 29                                                                                                                                                                                                                                                                                                                                              |                                          |                                                                                                                                                                                                                                                                                                |                                                                                                                                                                                                                                                                                                                                                                                                                                                                                                                                                                                                                                                                                                                                                                                 |                                     |                                       |                                         |                                                                      |    |    |                                                                                 |    |    |                                                                   |    |    |                                                                      |    |    |                                                                                                                                                                                                                                                                                                                                                                                                                                              |
| Healthcare workers who treat people with COVID-19 should be isolated            | 36                                                                                          | 39                                                                                                                                                                                                                                                                                                                                              |                                          |                                                                                                                                                                                                                                                                                                |                                                                                                                                                                                                                                                                                                                                                                                                                                                                                                                                                                                                                                                                                                                                                                                 |                                     |                                       |                                         |                                                                      |    |    |                                                                                 |    |    |                                                                   |    |    |                                                                      |    |    |                                                                                                                                                                                                                                                                                                                                                                                                                                              |

| General                                                                                                                     | Study                                                                                                             | Population                                                                                                                                                                                                           | Exposure                                 | Outcome                                                                                                                                                                                                                                                              | Results                                                                                                                                                                                                                                                                                                                                                                                                                                                                                                                                                                                                                                                                                                                                                                                                                                                                                                                                                                                                                                                                          | Comments                                                                                                                                                                             |    |    |                                                                      |    |    |                                                                                           |    |    |                                                                                                                             |    |    |                                                                                                                 |
|-----------------------------------------------------------------------------------------------------------------------------|-------------------------------------------------------------------------------------------------------------------|----------------------------------------------------------------------------------------------------------------------------------------------------------------------------------------------------------------------|------------------------------------------|----------------------------------------------------------------------------------------------------------------------------------------------------------------------------------------------------------------------------------------------------------------------|----------------------------------------------------------------------------------------------------------------------------------------------------------------------------------------------------------------------------------------------------------------------------------------------------------------------------------------------------------------------------------------------------------------------------------------------------------------------------------------------------------------------------------------------------------------------------------------------------------------------------------------------------------------------------------------------------------------------------------------------------------------------------------------------------------------------------------------------------------------------------------------------------------------------------------------------------------------------------------------------------------------------------------------------------------------------------------|--------------------------------------------------------------------------------------------------------------------------------------------------------------------------------------|----|----|----------------------------------------------------------------------|----|----|-------------------------------------------------------------------------------------------|----|----|-----------------------------------------------------------------------------------------------------------------------------|----|----|-----------------------------------------------------------------------------------------------------------------|
|                                                                                                                             |                                                                                                                   | n.a.                                                                                                                                                                                                                 |                                          |                                                                                                                                                                                                                                                                      | <table><tr><td>I do not want to be around healthcare workers who treat COVID-19 patients</td><td>47</td><td>42</td></tr><tr><td>I do not want to be around someone who works in a healthcare setting</td><td>33</td><td>30</td></tr><tr><td>Healthcare workers who treat people with COVID-19 should be separated from their families</td><td>31</td><td>35</td></tr><tr><td>I would not be comfortable visiting a healthcare worker for medical reasons because I would be worried I might get COVID-19</td><td>34</td><td>38</td></tr></table> <p>Applauding HCWs: “In the past seven days, I have clapped and cheered for healthcare workers”</p> <p><b>Conditions increasing work-related stigmatization:</b><br/>was not investigated</p> <p><b>Measures to prevent/ deal with stigmatization at work:</b><br/>was not investigated</p> <p><b>Unfavourable health consequences associated with stigmatization:</b> COVID-19 Stress Syndrome. Results are shown in Tab. 2.</p> <p><b>Stigmatization studied in association with return-to-work:</b> was not investigated</p> | I do not want to be around healthcare workers who treat COVID-19 patients                                                                                                            | 47 | 42 | I do not want to be around someone who works in a healthcare setting | 33 | 30 | Healthcare workers who treat people with COVID-19 should be separated from their families | 31 | 35 | I would not be comfortable visiting a healthcare worker for medical reasons because I would be worried I might get COVID-19 | 34 | 38 | not reported; # invited not reported<br>- analysis method: only descriptive statistics applied<br>- confounders |
| I do not want to be around healthcare workers who treat COVID-19 patients                                                   | 47                                                                                                                | 42                                                                                                                                                                                                                   |                                          |                                                                                                                                                                                                                                                                      |                                                                                                                                                                                                                                                                                                                                                                                                                                                                                                                                                                                                                                                                                                                                                                                                                                                                                                                                                                                                                                                                                  |                                                                                                                                                                                      |    |    |                                                                      |    |    |                                                                                           |    |    |                                                                                                                             |    |    |                                                                                                                 |
| I do not want to be around someone who works in a healthcare setting                                                        | 33                                                                                                                | 30                                                                                                                                                                                                                   |                                          |                                                                                                                                                                                                                                                                      |                                                                                                                                                                                                                                                                                                                                                                                                                                                                                                                                                                                                                                                                                                                                                                                                                                                                                                                                                                                                                                                                                  |                                                                                                                                                                                      |    |    |                                                                      |    |    |                                                                                           |    |    |                                                                                                                             |    |    |                                                                                                                 |
| Healthcare workers who treat people with COVID-19 should be separated from their families                                   | 31                                                                                                                | 35                                                                                                                                                                                                                   |                                          |                                                                                                                                                                                                                                                                      |                                                                                                                                                                                                                                                                                                                                                                                                                                                                                                                                                                                                                                                                                                                                                                                                                                                                                                                                                                                                                                                                                  |                                                                                                                                                                                      |    |    |                                                                      |    |    |                                                                                           |    |    |                                                                                                                             |    |    |                                                                                                                 |
| I would not be comfortable visiting a healthcare worker for medical reasons because I would be worried I might get COVID-19 | 34                                                                                                                | 38                                                                                                                                                                                                                   |                                          |                                                                                                                                                                                                                                                                      |                                                                                                                                                                                                                                                                                                                                                                                                                                                                                                                                                                                                                                                                                                                                                                                                                                                                                                                                                                                                                                                                                  |                                                                                                                                                                                      |    |    |                                                                      |    |    |                                                                                           |    |    |                                                                                                                             |    |    |                                                                                                                 |
| 865<br>Uvais,<br>India,<br>2020<br><br>High risk                                                                            | <b>Study design:</b> Cross-sectional<br><b>Time of Study:</b> 25 - 27 April<br><b>Follow-up mean, range:</b> n.a. | <b>Job description:</b> Doctors working in hospitals; 72.4% part of the medical team directly involved in COVID-19 management; 29.2% history of COVID-19 positive patients, 31% history of quarantine<br>Speciality: | During COVID-19 pandemic (not specified) | Perceived stigma: stigma scale with 13 items (each scored on a 5-point Likert scale, total score 0 – 52; total score ≥26: high levels of perceived stigma)<br><br><b>Form of stigmatization:</b><br><u>Self-stigma (perceived); discrimination, social exclusion</u> | <b>Prevalence of stigmatization:</b><br><u>Self-stigma (perceived and anticipated)</u><br><br>n=36 (62.1%) had a score ≥ 26 on the stigma scale<br>Mean: 28.3 (SD 8.8)<br>Association stigma & sex: ( $\chi^2 = 8.7$ )<br><br><b>Conditions increasing work-related stigmatization:</b> was not investigated<br><br><b>Measures to prevent/ deal with stigmatization at work:</b> was not investigated                                                                                                                                                                                                                                                                                                                                                                                                                                                                                                                                                                                                                                                                           | + no conflict of interest<br>+ funding stated (none)<br>+ outcome: measurement of psychological impact due to stigmatization with validated instruments<br><br>- no ethical approval |    |    |                                                                      |    |    |                                                                                           |    |    |                                                                                                                             |    |    |                                                                                                                 |

| General                                             | Study                                                                                            | Population                                                                                                                                                                                                                                                                                                                                                                                                                                                                                                                                                                                                              | Exposure                                             | Outcome                                                                                                                                                                                                                                                      | Results                                                                                                                                                                                                                                                              | Comments                                                                                                                                                          |
|-----------------------------------------------------|--------------------------------------------------------------------------------------------------|-------------------------------------------------------------------------------------------------------------------------------------------------------------------------------------------------------------------------------------------------------------------------------------------------------------------------------------------------------------------------------------------------------------------------------------------------------------------------------------------------------------------------------------------------------------------------------------------------------------------------|------------------------------------------------------|--------------------------------------------------------------------------------------------------------------------------------------------------------------------------------------------------------------------------------------------------------------|----------------------------------------------------------------------------------------------------------------------------------------------------------------------------------------------------------------------------------------------------------------------|-------------------------------------------------------------------------------------------------------------------------------------------------------------------|
|                                                     |                                                                                                  | <p>Critical care n=10<br/>Internal medicine n=6, Anaesthesia n=5, Paediatrics n=5, Emergency medicine n=2, Gastroenterology n=2, Other specialist n=5, Non-specialist n=23</p> <p><b>Inclusion criteria:</b> none</p> <p><b># invited:</b> n.a.<br/>convenience sample -&gt; snowball technique:</p> <p><b># baseline:</b> n=58<br/><b># follow-up:</b> n.a.</p> <p><b>Age at baseline:</b><br/>20-30 years: n=28<br/>31-40 years: n=25<br/>41-50 years: n=4<br/>61-70 years: n=1</p> <p><b>% of females:</b><br/>39.7%</p> <p><b>Response:</b> n.a.<br/>(convenience sample)</p> <p><b>Loss-to-follow-up:</b> n.a.</p> |                                                      | <p><u>Self-stigma (anticipated)</u></p>                                                                                                                                                                                                                      | <p><b>Unfavourable health consequences associated with stigmatization:</b> Stress. Results are shown in Tab. 2.</p> <p><b>Stigmatization studied in association with return-to-work:</b> was not investigated</p>                                                    | <p>- recruitment procedure:<br/>convenience sample<br/>- confounders<br/>- analysis method</p>                                                                    |
| <p>7272<br/>Uvais, 2020, India</p> <p>High risk</p> | <p><b>Study design:</b> Cross-sectional</p> <p><b>Time of Study:</b> 26. April-07. July 2020</p> | <p><b>Job description:</b><br/>Haemodialysis staff<br/>Dialysis technicians: 55.2%<br/>Dialysis nurses: 44.8%</p> <p><b>Inclusion criteria:</b> none</p> <p><b># invited:</b> n.a.<br/>snowball technique</p>                                                                                                                                                                                                                                                                                                                                                                                                           | <p>Being dialysis staff during COVID-19 pandemic</p> | <p>Perceived stigma: stigma scale with 13 items (each scored on a 5-point Likert scale, total score 0 – 52; total score <math>\geq 26</math>: high levels of perceived stigma)</p> <p><b>Form of stigmatization:</b><br/><u>Self-stigma (perceived):</u></p> | <p><b>Prevalence of stigmatization:</b></p> <p><u>Self-stigma (perceived and anticipated)</u></p> <p>High levels of perceived stigma: n=132 (54.6%), mean (SD)= 25.3 (8.1)</p> <p><b>Conditions increasing work-related stigmatization:</b> was not investigated</p> | <p>+ informed consent<br/>+ ethical approval by the Iqraa International Hospital and Research Centre Institutional Review Board<br/>+ no conflict of interest</p> |

| General                                     | Study                                                           | Population                                                                                                                                                           | Exposure                                 | Outcome                                                                                                                                                                                                  | Results                                                                                                                                                                                                                                                                                                                         | Comments                                                                                                                                                                                                                                                                                                                                                                                                                                                                                                                                   |                        |        |  |                                                                                                                                                           |
|---------------------------------------------|-----------------------------------------------------------------|----------------------------------------------------------------------------------------------------------------------------------------------------------------------|------------------------------------------|----------------------------------------------------------------------------------------------------------------------------------------------------------------------------------------------------------|---------------------------------------------------------------------------------------------------------------------------------------------------------------------------------------------------------------------------------------------------------------------------------------------------------------------------------|--------------------------------------------------------------------------------------------------------------------------------------------------------------------------------------------------------------------------------------------------------------------------------------------------------------------------------------------------------------------------------------------------------------------------------------------------------------------------------------------------------------------------------------------|------------------------|--------|--|-----------------------------------------------------------------------------------------------------------------------------------------------------------|
|                                             | Follow-up mean, range: n.a                                      | # baseline: n=335<br># follow-up: n.a.<br>Age at baseline: 18-30 years: 77%<br>% of females: 72.8%<br>Response: n.a. (convenience sample)<br>Loss-to-follow-up: n.a. |                                          | <u>discrimination, social exclusion</u><br><br>Self-stigma (anticipated)                                                                                                                                 | Measures to prevent/ deal with stigmatization at work: was not investigated<br><br>Unfavourable health consequences associated with stigmatization: Stress. Results are shown in Tab. 2.<br><br>Stigmatization studied in association with return-to-work: was not investigated                                                 | + funding stated (none)<br>+ outcome: measurement of stigma with a 13-item instrument<br>+ measurement of stress with a validated instrument<br><br>- recruitment procedure: convenience sample<br>- analysis method<br>- investigation of the association between stigmatization and stress only with Pearson's chi-square test<br>- no consideration of any confounders in the analysis of the association between stigmatization and stress<br>- no investigation of a temporal relationship possible due to the cross-sectional design |                        |        |  |                                                                                                                                                           |
| 7284<br>Yadav, 2020, India<br><br>High risk | Study design: Cross-sectional<br>Time of Study: May - July 2020 | Job description: Health Care Professionals (HCPs)<br>Designation: Resident doctors: n=298<br>Faculty/medical officers: n=97<br>Nursing: n=29                         | During COVID-19 pandemic (not specified) | Adapted Stigma assessment and reduction of impact (SARI) Stigma scale (Adaption to South-East Asia and COVID-19). Experienced stigma = “encounters with stigmatizing attitude and behaviour from general | Prevalence of stigmatization:<br><u>Self-stigma (perceived)</u><br><br>Table 1: Socio-demographic characteristics of the study participants and perceived stigma related to COVID-19 (n=424) <table><tr><th>Socio-demographic characteristics</th><th>Perceived Stigma n (%)</th></tr><tr><td>Gender</td><td></td></tr></table> | Socio-demographic characteristics                                                                                                                                                                                                                                                                                                                                                                                                                                                                                                          | Perceived Stigma n (%) | Gender |  | + ethical approval from institutional ethics committee<br>+ no conflict of interest<br>+ funding stated (none)<br>+ outcome: validated questionnaire used |
| Socio-demographic characteristics           | Perceived Stigma n (%)                                          |                                                                                                                                                                      |                                          |                                                                                                                                                                                                          |                                                                                                                                                                                                                                                                                                                                 |                                                                                                                                                                                                                                                                                                                                                                                                                                                                                                                                            |                        |        |  |                                                                                                                                                           |
| Gender                                      |                                                                 |                                                                                                                                                                      |                                          |                                                                                                                                                                                                          |                                                                                                                                                                                                                                                                                                                                 |                                                                                                                                                                                                                                                                                                                                                                                                                                                                                                                                            |                        |        |  |                                                                                                                                                           |

| General                                                                                                                 | Study                       | Population                                                                                                                                                                                                                                                                                                                                                                                                                                                                           | Exposure   | Outcome                                                                                                                                                                                                                                                                                                                                                                                                                                                                                                                                                                                                                                                                                                                                                                                       | Results                                                                                                                                                                                                                                                                                                                                                                                                                                                                                                                                                                                                                                                                                                                                                                                                                                                                                                                                                                                                                                                                                                                                                                                                                                                                                                                                                                                                                                                                                                                                                                                                                                                                 |      |             |        |             | Comments    |  |                  |            |                          |           |         |           |             |  |                            |             |          |            |                                 |            |                          |            |        |            |  |            |          |            |       |                                                                                                                         |     |       |       |      |                                                                   |       |       |       |      |                                                                                                             |       |       |      |      |                                                                                                              |       |       |      |     |  |  |  |  |                                                                                                                                           |
|-------------------------------------------------------------------------------------------------------------------------|-----------------------------|--------------------------------------------------------------------------------------------------------------------------------------------------------------------------------------------------------------------------------------------------------------------------------------------------------------------------------------------------------------------------------------------------------------------------------------------------------------------------------------|------------|-----------------------------------------------------------------------------------------------------------------------------------------------------------------------------------------------------------------------------------------------------------------------------------------------------------------------------------------------------------------------------------------------------------------------------------------------------------------------------------------------------------------------------------------------------------------------------------------------------------------------------------------------------------------------------------------------------------------------------------------------------------------------------------------------|-------------------------------------------------------------------------------------------------------------------------------------------------------------------------------------------------------------------------------------------------------------------------------------------------------------------------------------------------------------------------------------------------------------------------------------------------------------------------------------------------------------------------------------------------------------------------------------------------------------------------------------------------------------------------------------------------------------------------------------------------------------------------------------------------------------------------------------------------------------------------------------------------------------------------------------------------------------------------------------------------------------------------------------------------------------------------------------------------------------------------------------------------------------------------------------------------------------------------------------------------------------------------------------------------------------------------------------------------------------------------------------------------------------------------------------------------------------------------------------------------------------------------------------------------------------------------------------------------------------------------------------------------------------------------|------|-------------|--------|-------------|-------------|--|------------------|------------|--------------------------|-----------|---------|-----------|-------------|--|----------------------------|-------------|----------|------------|---------------------------------|------------|--------------------------|------------|--------|------------|--|------------|----------|------------|-------|-------------------------------------------------------------------------------------------------------------------------|-----|-------|-------|------|-------------------------------------------------------------------|-------|-------|-------|------|-------------------------------------------------------------------------------------------------------------|-------|-------|------|------|--------------------------------------------------------------------------------------------------------------|-------|-------|------|-----|--|--|--|--|-------------------------------------------------------------------------------------------------------------------------------------------|
|                                                                                                                         | Follow-up mean, range: n.a. | <b>Departments:</b><br>Medicine and Critical care : n=159<br>Surgical: n=103<br>Public Health/community medicine: n=80<br>Paraclinical departments: n=27<br>Others: n=55<br><b>Inclusion criteria:</b> none<br><b># invited:</b> n=1160 (participants received questionnaire)<br><b># baseline:</b> n=424 analysed<br><b># follow -up:</b> n.a.<br><b>Age at baseline:</b> median 29 years<br><b>% of females:</b> 57.5%<br><b>Response:</b> 36.6%<br><b>Loss-to-follow-up:</b> n.a. |            | population -> perceived stigma<br><br><u>Sections of the questionnaire measuring stigma:</u><br>1. Perceived stigma by the doctors at residential areas/hostels as well as workplace.<br>2. Stigma experienced by them at these places<br>3. Disclosure concerns about getting oneself tested<br>4. Apprehensions related to positive tested and fears or concerns related to quarantine and isolation<br><br><b>Forms of stigmatization:</b><br><u>Self-stigma (perceived): discrimination</u><br>Have you noticed any difference in the behaviour while you were wearing your lab-coat/uniform or hanging a stethoscope? Have you observed any difference in behaviour of your neighbours?<br>Have you perceived any stigma while shopping for grocery or daily items or vegetables in your | <table><tr><td>Male</td><td>123 (68.3%)</td></tr><tr><td>Female</td><td>178 (73.0%)</td></tr><tr><td colspan="2">Designation</td></tr><tr><td>Resident doctors</td><td>222(74.5%)</td></tr><tr><td>Faculty/Medical officers</td><td>58(59.8%)</td></tr><tr><td>Nursing</td><td>21(72.4%)</td></tr><tr><td colspan="2">Departments</td></tr><tr><td>Medicine and critical care</td><td>112 (70.4%)</td></tr><tr><td>Surgical</td><td>81 (78.6%)</td></tr><tr><td>Public health/ Community health</td><td>52 (65.0%)</td></tr><tr><td>Paraclinical departments</td><td>17 (63.0%)</td></tr><tr><td>Others</td><td>39 (70.9%)</td></tr></table><br>Table.: Self-Stigma (perceived) among healthcare professionals due to COVID-19<br><table><tr><td></td><td>Not at all</td><td>A little</td><td>Moderately</td><td>A lot</td></tr><tr><td>Have you noticed any difference in the behaviour while you were wearing your lab-coat/uniform or hanging a stethoscope?</td><td>54%</td><td>30.7%</td><td>11.8%</td><td>3.5%</td></tr><tr><td>Have you observed any difference in behaviour of your neighbours?</td><td>54.5%</td><td>30.7%</td><td>10.1%</td><td>4.7%</td></tr><tr><td>Have you perceived any stigma while shopping for grocery or daily items or vegetables in your nearby store?</td><td>65.3%</td><td>25.7%</td><td>8.7%</td><td>0.2%</td></tr><tr><td>Have you perceived any stigma in your residential society/apartment/colony as you are going to the hospital?</td><td>49.1%</td><td>36.8%</td><td>9.9%</td><td>4.2</td></tr></table><br>Perceived stigmatization: 82 of 424 (19.3%) -> 48.8% in their “residential societies”, 22.6% in the workplace | Male | 123 (68.3%) | Female | 178 (73.0%) | Designation |  | Resident doctors | 222(74.5%) | Faculty/Medical officers | 58(59.8%) | Nursing | 21(72.4%) | Departments |  | Medicine and critical care | 112 (70.4%) | Surgical | 81 (78.6%) | Public health/ Community health | 52 (65.0%) | Paraclinical departments | 17 (63.0%) | Others | 39 (70.9%) |  | Not at all | A little | Moderately | A lot | Have you noticed any difference in the behaviour while you were wearing your lab-coat/uniform or hanging a stethoscope? | 54% | 30.7% | 11.8% | 3.5% | Have you observed any difference in behaviour of your neighbours? | 54.5% | 30.7% | 10.1% | 4.7% | Have you perceived any stigma while shopping for grocery or daily items or vegetables in your nearby store? | 65.3% | 25.7% | 8.7% | 0.2% | Have you perceived any stigma in your residential society/apartment/colony as you are going to the hospital? | 49.1% | 36.8% | 9.9% | 4.2 |  |  |  |  | - recruitment procedure: low response (36.6%)<br>- confounders: age not considered<br>- analysis method: only descriptive statistics used |
| Male                                                                                                                    | 123 (68.3%)                 |                                                                                                                                                                                                                                                                                                                                                                                                                                                                                      |            |                                                                                                                                                                                                                                                                                                                                                                                                                                                                                                                                                                                                                                                                                                                                                                                               |                                                                                                                                                                                                                                                                                                                                                                                                                                                                                                                                                                                                                                                                                                                                                                                                                                                                                                                                                                                                                                                                                                                                                                                                                                                                                                                                                                                                                                                                                                                                                                                                                                                                         |      |             |        |             |             |  |                  |            |                          |           |         |           |             |  |                            |             |          |            |                                 |            |                          |            |        |            |  |            |          |            |       |                                                                                                                         |     |       |       |      |                                                                   |       |       |       |      |                                                                                                             |       |       |      |      |                                                                                                              |       |       |      |     |  |  |  |  |                                                                                                                                           |
| Female                                                                                                                  | 178 (73.0%)                 |                                                                                                                                                                                                                                                                                                                                                                                                                                                                                      |            |                                                                                                                                                                                                                                                                                                                                                                                                                                                                                                                                                                                                                                                                                                                                                                                               |                                                                                                                                                                                                                                                                                                                                                                                                                                                                                                                                                                                                                                                                                                                                                                                                                                                                                                                                                                                                                                                                                                                                                                                                                                                                                                                                                                                                                                                                                                                                                                                                                                                                         |      |             |        |             |             |  |                  |            |                          |           |         |           |             |  |                            |             |          |            |                                 |            |                          |            |        |            |  |            |          |            |       |                                                                                                                         |     |       |       |      |                                                                   |       |       |       |      |                                                                                                             |       |       |      |      |                                                                                                              |       |       |      |     |  |  |  |  |                                                                                                                                           |
| Designation                                                                                                             |                             |                                                                                                                                                                                                                                                                                                                                                                                                                                                                                      |            |                                                                                                                                                                                                                                                                                                                                                                                                                                                                                                                                                                                                                                                                                                                                                                                               |                                                                                                                                                                                                                                                                                                                                                                                                                                                                                                                                                                                                                                                                                                                                                                                                                                                                                                                                                                                                                                                                                                                                                                                                                                                                                                                                                                                                                                                                                                                                                                                                                                                                         |      |             |        |             |             |  |                  |            |                          |           |         |           |             |  |                            |             |          |            |                                 |            |                          |            |        |            |  |            |          |            |       |                                                                                                                         |     |       |       |      |                                                                   |       |       |       |      |                                                                                                             |       |       |      |      |                                                                                                              |       |       |      |     |  |  |  |  |                                                                                                                                           |
| Resident doctors                                                                                                        | 222(74.5%)                  |                                                                                                                                                                                                                                                                                                                                                                                                                                                                                      |            |                                                                                                                                                                                                                                                                                                                                                                                                                                                                                                                                                                                                                                                                                                                                                                                               |                                                                                                                                                                                                                                                                                                                                                                                                                                                                                                                                                                                                                                                                                                                                                                                                                                                                                                                                                                                                                                                                                                                                                                                                                                                                                                                                                                                                                                                                                                                                                                                                                                                                         |      |             |        |             |             |  |                  |            |                          |           |         |           |             |  |                            |             |          |            |                                 |            |                          |            |        |            |  |            |          |            |       |                                                                                                                         |     |       |       |      |                                                                   |       |       |       |      |                                                                                                             |       |       |      |      |                                                                                                              |       |       |      |     |  |  |  |  |                                                                                                                                           |
| Faculty/Medical officers                                                                                                | 58(59.8%)                   |                                                                                                                                                                                                                                                                                                                                                                                                                                                                                      |            |                                                                                                                                                                                                                                                                                                                                                                                                                                                                                                                                                                                                                                                                                                                                                                                               |                                                                                                                                                                                                                                                                                                                                                                                                                                                                                                                                                                                                                                                                                                                                                                                                                                                                                                                                                                                                                                                                                                                                                                                                                                                                                                                                                                                                                                                                                                                                                                                                                                                                         |      |             |        |             |             |  |                  |            |                          |           |         |           |             |  |                            |             |          |            |                                 |            |                          |            |        |            |  |            |          |            |       |                                                                                                                         |     |       |       |      |                                                                   |       |       |       |      |                                                                                                             |       |       |      |      |                                                                                                              |       |       |      |     |  |  |  |  |                                                                                                                                           |
| Nursing                                                                                                                 | 21(72.4%)                   |                                                                                                                                                                                                                                                                                                                                                                                                                                                                                      |            |                                                                                                                                                                                                                                                                                                                                                                                                                                                                                                                                                                                                                                                                                                                                                                                               |                                                                                                                                                                                                                                                                                                                                                                                                                                                                                                                                                                                                                                                                                                                                                                                                                                                                                                                                                                                                                                                                                                                                                                                                                                                                                                                                                                                                                                                                                                                                                                                                                                                                         |      |             |        |             |             |  |                  |            |                          |           |         |           |             |  |                            |             |          |            |                                 |            |                          |            |        |            |  |            |          |            |       |                                                                                                                         |     |       |       |      |                                                                   |       |       |       |      |                                                                                                             |       |       |      |      |                                                                                                              |       |       |      |     |  |  |  |  |                                                                                                                                           |
| Departments                                                                                                             |                             |                                                                                                                                                                                                                                                                                                                                                                                                                                                                                      |            |                                                                                                                                                                                                                                                                                                                                                                                                                                                                                                                                                                                                                                                                                                                                                                                               |                                                                                                                                                                                                                                                                                                                                                                                                                                                                                                                                                                                                                                                                                                                                                                                                                                                                                                                                                                                                                                                                                                                                                                                                                                                                                                                                                                                                                                                                                                                                                                                                                                                                         |      |             |        |             |             |  |                  |            |                          |           |         |           |             |  |                            |             |          |            |                                 |            |                          |            |        |            |  |            |          |            |       |                                                                                                                         |     |       |       |      |                                                                   |       |       |       |      |                                                                                                             |       |       |      |      |                                                                                                              |       |       |      |     |  |  |  |  |                                                                                                                                           |
| Medicine and critical care                                                                                              | 112 (70.4%)                 |                                                                                                                                                                                                                                                                                                                                                                                                                                                                                      |            |                                                                                                                                                                                                                                                                                                                                                                                                                                                                                                                                                                                                                                                                                                                                                                                               |                                                                                                                                                                                                                                                                                                                                                                                                                                                                                                                                                                                                                                                                                                                                                                                                                                                                                                                                                                                                                                                                                                                                                                                                                                                                                                                                                                                                                                                                                                                                                                                                                                                                         |      |             |        |             |             |  |                  |            |                          |           |         |           |             |  |                            |             |          |            |                                 |            |                          |            |        |            |  |            |          |            |       |                                                                                                                         |     |       |       |      |                                                                   |       |       |       |      |                                                                                                             |       |       |      |      |                                                                                                              |       |       |      |     |  |  |  |  |                                                                                                                                           |
| Surgical                                                                                                                | 81 (78.6%)                  |                                                                                                                                                                                                                                                                                                                                                                                                                                                                                      |            |                                                                                                                                                                                                                                                                                                                                                                                                                                                                                                                                                                                                                                                                                                                                                                                               |                                                                                                                                                                                                                                                                                                                                                                                                                                                                                                                                                                                                                                                                                                                                                                                                                                                                                                                                                                                                                                                                                                                                                                                                                                                                                                                                                                                                                                                                                                                                                                                                                                                                         |      |             |        |             |             |  |                  |            |                          |           |         |           |             |  |                            |             |          |            |                                 |            |                          |            |        |            |  |            |          |            |       |                                                                                                                         |     |       |       |      |                                                                   |       |       |       |      |                                                                                                             |       |       |      |      |                                                                                                              |       |       |      |     |  |  |  |  |                                                                                                                                           |
| Public health/ Community health                                                                                         | 52 (65.0%)                  |                                                                                                                                                                                                                                                                                                                                                                                                                                                                                      |            |                                                                                                                                                                                                                                                                                                                                                                                                                                                                                                                                                                                                                                                                                                                                                                                               |                                                                                                                                                                                                                                                                                                                                                                                                                                                                                                                                                                                                                                                                                                                                                                                                                                                                                                                                                                                                                                                                                                                                                                                                                                                                                                                                                                                                                                                                                                                                                                                                                                                                         |      |             |        |             |             |  |                  |            |                          |           |         |           |             |  |                            |             |          |            |                                 |            |                          |            |        |            |  |            |          |            |       |                                                                                                                         |     |       |       |      |                                                                   |       |       |       |      |                                                                                                             |       |       |      |      |                                                                                                              |       |       |      |     |  |  |  |  |                                                                                                                                           |
| Paraclinical departments                                                                                                | 17 (63.0%)                  |                                                                                                                                                                                                                                                                                                                                                                                                                                                                                      |            |                                                                                                                                                                                                                                                                                                                                                                                                                                                                                                                                                                                                                                                                                                                                                                                               |                                                                                                                                                                                                                                                                                                                                                                                                                                                                                                                                                                                                                                                                                                                                                                                                                                                                                                                                                                                                                                                                                                                                                                                                                                                                                                                                                                                                                                                                                                                                                                                                                                                                         |      |             |        |             |             |  |                  |            |                          |           |         |           |             |  |                            |             |          |            |                                 |            |                          |            |        |            |  |            |          |            |       |                                                                                                                         |     |       |       |      |                                                                   |       |       |       |      |                                                                                                             |       |       |      |      |                                                                                                              |       |       |      |     |  |  |  |  |                                                                                                                                           |
| Others                                                                                                                  | 39 (70.9%)                  |                                                                                                                                                                                                                                                                                                                                                                                                                                                                                      |            |                                                                                                                                                                                                                                                                                                                                                                                                                                                                                                                                                                                                                                                                                                                                                                                               |                                                                                                                                                                                                                                                                                                                                                                                                                                                                                                                                                                                                                                                                                                                                                                                                                                                                                                                                                                                                                                                                                                                                                                                                                                                                                                                                                                                                                                                                                                                                                                                                                                                                         |      |             |        |             |             |  |                  |            |                          |           |         |           |             |  |                            |             |          |            |                                 |            |                          |            |        |            |  |            |          |            |       |                                                                                                                         |     |       |       |      |                                                                   |       |       |       |      |                                                                                                             |       |       |      |      |                                                                                                              |       |       |      |     |  |  |  |  |                                                                                                                                           |
|                                                                                                                         | Not at all                  | A little                                                                                                                                                                                                                                                                                                                                                                                                                                                                             | Moderately | A lot                                                                                                                                                                                                                                                                                                                                                                                                                                                                                                                                                                                                                                                                                                                                                                                         |                                                                                                                                                                                                                                                                                                                                                                                                                                                                                                                                                                                                                                                                                                                                                                                                                                                                                                                                                                                                                                                                                                                                                                                                                                                                                                                                                                                                                                                                                                                                                                                                                                                                         |      |             |        |             |             |  |                  |            |                          |           |         |           |             |  |                            |             |          |            |                                 |            |                          |            |        |            |  |            |          |            |       |                                                                                                                         |     |       |       |      |                                                                   |       |       |       |      |                                                                                                             |       |       |      |      |                                                                                                              |       |       |      |     |  |  |  |  |                                                                                                                                           |
| Have you noticed any difference in the behaviour while you were wearing your lab-coat/uniform or hanging a stethoscope? | 54%                         | 30.7%                                                                                                                                                                                                                                                                                                                                                                                                                                                                                | 11.8%      | 3.5%                                                                                                                                                                                                                                                                                                                                                                                                                                                                                                                                                                                                                                                                                                                                                                                          |                                                                                                                                                                                                                                                                                                                                                                                                                                                                                                                                                                                                                                                                                                                                                                                                                                                                                                                                                                                                                                                                                                                                                                                                                                                                                                                                                                                                                                                                                                                                                                                                                                                                         |      |             |        |             |             |  |                  |            |                          |           |         |           |             |  |                            |             |          |            |                                 |            |                          |            |        |            |  |            |          |            |       |                                                                                                                         |     |       |       |      |                                                                   |       |       |       |      |                                                                                                             |       |       |      |      |                                                                                                              |       |       |      |     |  |  |  |  |                                                                                                                                           |
| Have you observed any difference in behaviour of your neighbours?                                                       | 54.5%                       | 30.7%                                                                                                                                                                                                                                                                                                                                                                                                                                                                                | 10.1%      | 4.7%                                                                                                                                                                                                                                                                                                                                                                                                                                                                                                                                                                                                                                                                                                                                                                                          |                                                                                                                                                                                                                                                                                                                                                                                                                                                                                                                                                                                                                                                                                                                                                                                                                                                                                                                                                                                                                                                                                                                                                                                                                                                                                                                                                                                                                                                                                                                                                                                                                                                                         |      |             |        |             |             |  |                  |            |                          |           |         |           |             |  |                            |             |          |            |                                 |            |                          |            |        |            |  |            |          |            |       |                                                                                                                         |     |       |       |      |                                                                   |       |       |       |      |                                                                                                             |       |       |      |      |                                                                                                              |       |       |      |     |  |  |  |  |                                                                                                                                           |
| Have you perceived any stigma while shopping for grocery or daily items or vegetables in your nearby store?             | 65.3%                       | 25.7%                                                                                                                                                                                                                                                                                                                                                                                                                                                                                | 8.7%       | 0.2%                                                                                                                                                                                                                                                                                                                                                                                                                                                                                                                                                                                                                                                                                                                                                                                          |                                                                                                                                                                                                                                                                                                                                                                                                                                                                                                                                                                                                                                                                                                                                                                                                                                                                                                                                                                                                                                                                                                                                                                                                                                                                                                                                                                                                                                                                                                                                                                                                                                                                         |      |             |        |             |             |  |                  |            |                          |           |         |           |             |  |                            |             |          |            |                                 |            |                          |            |        |            |  |            |          |            |       |                                                                                                                         |     |       |       |      |                                                                   |       |       |       |      |                                                                                                             |       |       |      |      |                                                                                                              |       |       |      |     |  |  |  |  |                                                                                                                                           |
| Have you perceived any stigma in your residential society/apartment/colony as you are going to the hospital?            | 49.1%                       | 36.8%                                                                                                                                                                                                                                                                                                                                                                                                                                                                                | 9.9%       | 4.2                                                                                                                                                                                                                                                                                                                                                                                                                                                                                                                                                                                                                                                                                                                                                                                           |                                                                                                                                                                                                                                                                                                                                                                                                                                                                                                                                                                                                                                                                                                                                                                                                                                                                                                                                                                                                                                                                                                                                                                                                                                                                                                                                                                                                                                                                                                                                                                                                                                                                         |      |             |        |             |             |  |                  |            |                          |           |         |           |             |  |                            |             |          |            |                                 |            |                          |            |        |            |  |            |          |            |       |                                                                                                                         |     |       |       |      |                                                                   |       |       |       |      |                                                                                                             |       |       |      |      |                                                                                                              |       |       |      |     |  |  |  |  |                                                                                                                                           |

| General                                            | Study                                                                                                                                              | Population                                                                                                                                                                                                                                                                           | Exposure                                        | Outcome                                                                                                                                                                                                                                             | Results                                                                                                                                                                                                                                                                                                                                                                                                                                                                                                                                                                                                                                                                                                                                                                                                                                                                                                                                    | Comments                                     |                                   |                |                      |                                       |            |                                   |            |                                 |            |        |    |    |           |     |    |    |        |    |    |    |            |           |    |      |       |       |    |    |                                                                                                                                                                                                                                                                                 |
|----------------------------------------------------|----------------------------------------------------------------------------------------------------------------------------------------------------|--------------------------------------------------------------------------------------------------------------------------------------------------------------------------------------------------------------------------------------------------------------------------------------|-------------------------------------------------|-----------------------------------------------------------------------------------------------------------------------------------------------------------------------------------------------------------------------------------------------------|--------------------------------------------------------------------------------------------------------------------------------------------------------------------------------------------------------------------------------------------------------------------------------------------------------------------------------------------------------------------------------------------------------------------------------------------------------------------------------------------------------------------------------------------------------------------------------------------------------------------------------------------------------------------------------------------------------------------------------------------------------------------------------------------------------------------------------------------------------------------------------------------------------------------------------------------|----------------------------------------------|-----------------------------------|----------------|----------------------|---------------------------------------|------------|-----------------------------------|------------|---------------------------------|------------|--------|----|----|-----------|-----|----|----|--------|----|----|----|------------|-----------|----|------|-------|-------|----|----|---------------------------------------------------------------------------------------------------------------------------------------------------------------------------------------------------------------------------------------------------------------------------------|
|                                                    |                                                                                                                                                    |                                                                                                                                                                                                                                                                                      |                                                 | <p>nearby store? Have you perceived any stigma in your residential society/apartment/colony as you are going to the hospital?</p> <p><u>Self-stigma (perceived): aggressive behaviour/mobbing</u></p> <p><u>Associative stigma</u></p>              | <p>Table: Forms of stigma experienced by the HCPs</p> <table><tr><th>Nature of stigma experienced by participants</th><th>Number of participants n (%) n=82</th></tr><tr><td>Rude Behaviour</td><td>57 (69.5%)</td></tr><tr><td>Harassment by landlord/neighbours/RWA</td><td>24 (29.3%)</td></tr><tr><td>Racial/obscene/derogatory remarks</td><td>26 (31.7%)</td></tr><tr><td>Harassment by security personal</td><td>11 (13.4%)</td></tr></table> <p><u>Associative stigma</u><br/>11.8% (n=50) family members experienced stigmatization</p> <p><b>Conditions increasing work-related stigmatization:</b><br/>was not investigated</p> <p><b>Measures to prevent/ deal with stigmatization at work:</b><br/>was not investigated</p> <p><b>Unfavourable health consequences associated with stigmatization:</b> was not investigated</p> <p><b>Stigmatization studied in association with return-to-work:</b> was not investigated</p> | Nature of stigma experienced by participants | Number of participants n (%) n=82 | Rude Behaviour | 57 (69.5%)           | Harassment by landlord/neighbours/RWA | 24 (29.3%) | Racial/obscene/derogatory remarks | 26 (31.7%) | Harassment by security personal | 11 (13.4%) |        |    |    |           |     |    |    |        |    |    |    |            |           |    |      |       |       |    |    |                                                                                                                                                                                                                                                                                 |
| Nature of stigma experienced by participants       | Number of participants n (%) n=82                                                                                                                  |                                                                                                                                                                                                                                                                                      |                                                 |                                                                                                                                                                                                                                                     |                                                                                                                                                                                                                                                                                                                                                                                                                                                                                                                                                                                                                                                                                                                                                                                                                                                                                                                                            |                                              |                                   |                |                      |                                       |            |                                   |            |                                 |            |        |    |    |           |     |    |    |        |    |    |    |            |           |    |      |       |       |    |    |                                                                                                                                                                                                                                                                                 |
| Rude Behaviour                                     | 57 (69.5%)                                                                                                                                         |                                                                                                                                                                                                                                                                                      |                                                 |                                                                                                                                                                                                                                                     |                                                                                                                                                                                                                                                                                                                                                                                                                                                                                                                                                                                                                                                                                                                                                                                                                                                                                                                                            |                                              |                                   |                |                      |                                       |            |                                   |            |                                 |            |        |    |    |           |     |    |    |        |    |    |    |            |           |    |      |       |       |    |    |                                                                                                                                                                                                                                                                                 |
| Harassment by landlord/neighbours/RWA              | 24 (29.3%)                                                                                                                                         |                                                                                                                                                                                                                                                                                      |                                                 |                                                                                                                                                                                                                                                     |                                                                                                                                                                                                                                                                                                                                                                                                                                                                                                                                                                                                                                                                                                                                                                                                                                                                                                                                            |                                              |                                   |                |                      |                                       |            |                                   |            |                                 |            |        |    |    |           |     |    |    |        |    |    |    |            |           |    |      |       |       |    |    |                                                                                                                                                                                                                                                                                 |
| Racial/obscene/derogatory remarks                  | 26 (31.7%)                                                                                                                                         |                                                                                                                                                                                                                                                                                      |                                                 |                                                                                                                                                                                                                                                     |                                                                                                                                                                                                                                                                                                                                                                                                                                                                                                                                                                                                                                                                                                                                                                                                                                                                                                                                            |                                              |                                   |                |                      |                                       |            |                                   |            |                                 |            |        |    |    |           |     |    |    |        |    |    |    |            |           |    |      |       |       |    |    |                                                                                                                                                                                                                                                                                 |
| Harassment by security personal                    | 11 (13.4%)                                                                                                                                         |                                                                                                                                                                                                                                                                                      |                                                 |                                                                                                                                                                                                                                                     |                                                                                                                                                                                                                                                                                                                                                                                                                                                                                                                                                                                                                                                                                                                                                                                                                                                                                                                                            |                                              |                                   |                |                      |                                       |            |                                   |            |                                 |            |        |    |    |           |     |    |    |        |    |    |    |            |           |    |      |       |       |    |    |                                                                                                                                                                                                                                                                                 |
| 7220<br>Zandifar<br>2020,<br>Iran<br><br>High risk | <p><b>Study design:</b><br/>Cross sectional</p> <p><b>Time of Study:</b><br/>20 March - 3 April 2020</p> <p><b>Follow-up mean, range:</b> n.a.</p> | <p><b>Job description:</b><br/>HCWs engaged in the field of diagnostic and treatment of COVID-19 patients working in 9 general hospitals: Physicians: n=80 Nurses: n=543 Technicians: n=253</p> <p><b>Inclusion criteria:</b><br/>HCWs in internal medicine and infectious wards</p> | <p>During COVID-19 pandemic (not specified)</p> | <p>Stigma: 22-item modified stigma-related questionnaire adopted from the HIV Stigma Scale (5-point Likert scale: strongly disagree to strongly agree)</p> <p><b>Form of stigmatization:</b><br/><u>Self-stigma (perceived): discrimination</u></p> | <p><b>Prevalence of stigmatization:</b></p> <p><u>Self-stigma (perceived):</u></p> <p>Tab. 3: Median (IQR) of the Total and Subscale PTSS Score According to Demographic Characteristics</p> <table><tr><th colspan="2">Stigma</th><th>Median</th><th>Inter Quartile Range</th><th>p</th></tr><tr><td rowspan="2">Sex</td><td>Male</td><td>26</td><td>15.25</td><td rowspan="2">0.01*</td></tr><tr><td>Female</td><td>27</td><td>17</td></tr><tr><td rowspan="2">Frontline</td><td>Yes</td><td>28</td><td>17</td><td rowspan="2">0.006*</td></tr><tr><td>No</td><td>25</td><td>17</td></tr><tr><td rowspan="2">Occupation</td><td>Physician</td><td>29</td><td>19.5</td><td rowspan="2">0.04*</td></tr><tr><td>Nurse</td><td>26</td><td>17</td></tr></table>                                                                                                                                                                               | Stigma                                       |                                   | Median         | Inter Quartile Range | p                                     | Sex        | Male                              | 26         | 15.25                           | 0.01*      | Female | 27 | 17 | Frontline | Yes | 28 | 17 | 0.006* | No | 25 | 17 | Occupation | Physician | 29 | 19.5 | 0.04* | Nurse | 26 | 17 | <p>+ recruitment procedure: multistage sampling method (proportional random sampling)<br/>+ high response<br/>+ outcome: usage of validated instruments to measure PTSD and stigma<br/>+ ethics approval from the ethics committee of Alborz University of Medical Sciences</p> |
| Stigma                                             |                                                                                                                                                    | Median                                                                                                                                                                                                                                                                               | Inter Quartile Range                            | p                                                                                                                                                                                                                                                   |                                                                                                                                                                                                                                                                                                                                                                                                                                                                                                                                                                                                                                                                                                                                                                                                                                                                                                                                            |                                              |                                   |                |                      |                                       |            |                                   |            |                                 |            |        |    |    |           |     |    |    |        |    |    |    |            |           |    |      |       |       |    |    |                                                                                                                                                                                                                                                                                 |
| Sex                                                | Male                                                                                                                                               | 26                                                                                                                                                                                                                                                                                   | 15.25                                           | 0.01*                                                                                                                                                                                                                                               |                                                                                                                                                                                                                                                                                                                                                                                                                                                                                                                                                                                                                                                                                                                                                                                                                                                                                                                                            |                                              |                                   |                |                      |                                       |            |                                   |            |                                 |            |        |    |    |           |     |    |    |        |    |    |    |            |           |    |      |       |       |    |    |                                                                                                                                                                                                                                                                                 |
|                                                    | Female                                                                                                                                             | 27                                                                                                                                                                                                                                                                                   | 17                                              |                                                                                                                                                                                                                                                     |                                                                                                                                                                                                                                                                                                                                                                                                                                                                                                                                                                                                                                                                                                                                                                                                                                                                                                                                            |                                              |                                   |                |                      |                                       |            |                                   |            |                                 |            |        |    |    |           |     |    |    |        |    |    |    |            |           |    |      |       |       |    |    |                                                                                                                                                                                                                                                                                 |
| Frontline                                          | Yes                                                                                                                                                | 28                                                                                                                                                                                                                                                                                   | 17                                              | 0.006*                                                                                                                                                                                                                                              |                                                                                                                                                                                                                                                                                                                                                                                                                                                                                                                                                                                                                                                                                                                                                                                                                                                                                                                                            |                                              |                                   |                |                      |                                       |            |                                   |            |                                 |            |        |    |    |           |     |    |    |        |    |    |    |            |           |    |      |       |       |    |    |                                                                                                                                                                                                                                                                                 |
|                                                    | No                                                                                                                                                 | 25                                                                                                                                                                                                                                                                                   | 17                                              |                                                                                                                                                                                                                                                     |                                                                                                                                                                                                                                                                                                                                                                                                                                                                                                                                                                                                                                                                                                                                                                                                                                                                                                                                            |                                              |                                   |                |                      |                                       |            |                                   |            |                                 |            |        |    |    |           |     |    |    |        |    |    |    |            |           |    |      |       |       |    |    |                                                                                                                                                                                                                                                                                 |
| Occupation                                         | Physician                                                                                                                                          | 29                                                                                                                                                                                                                                                                                   | 19.5                                            | 0.04*                                                                                                                                                                                                                                               |                                                                                                                                                                                                                                                                                                                                                                                                                                                                                                                                                                                                                                                                                                                                                                                                                                                                                                                                            |                                              |                                   |                |                      |                                       |            |                                   |            |                                 |            |        |    |    |           |     |    |    |        |    |    |    |            |           |    |      |       |       |    |    |                                                                                                                                                                                                                                                                                 |
|                                                    | Nurse                                                                                                                                              | 26                                                                                                                                                                                                                                                                                   | 17                                              |                                                                                                                                                                                                                                                     |                                                                                                                                                                                                                                                                                                                                                                                                                                                                                                                                                                                                                                                                                                                                                                                                                                                                                                                                            |                                              |                                   |                |                      |                                       |            |                                   |            |                                 |            |        |    |    |           |     |    |    |        |    |    |    |            |           |    |      |       |       |    |    |                                                                                                                                                                                                                                                                                 |



| General                                  | Study                                                                                                                    | Population                                                                                                                                                                                                                                                                                                                                                                                                  | Exposure                                                                                | Outcome                                                                                                                                                                                                                      | Results                                                                                                                                                                                                                                                                                                                                                                                                                                                                                                                                                                                                                                                                                                                                                                                                                       | Comments       |            |    |          |       |                                                                                                                                                                                                |       |     |      |        |       |      |                                                                                                                                                                                                                                                                                                                                                                                                                              |
|------------------------------------------|--------------------------------------------------------------------------------------------------------------------------|-------------------------------------------------------------------------------------------------------------------------------------------------------------------------------------------------------------------------------------------------------------------------------------------------------------------------------------------------------------------------------------------------------------|-----------------------------------------------------------------------------------------|------------------------------------------------------------------------------------------------------------------------------------------------------------------------------------------------------------------------------|-------------------------------------------------------------------------------------------------------------------------------------------------------------------------------------------------------------------------------------------------------------------------------------------------------------------------------------------------------------------------------------------------------------------------------------------------------------------------------------------------------------------------------------------------------------------------------------------------------------------------------------------------------------------------------------------------------------------------------------------------------------------------------------------------------------------------------|----------------|------------|----|----------|-------|------------------------------------------------------------------------------------------------------------------------------------------------------------------------------------------------|-------|-----|------|--------|-------|------|------------------------------------------------------------------------------------------------------------------------------------------------------------------------------------------------------------------------------------------------------------------------------------------------------------------------------------------------------------------------------------------------------------------------------|
|                                          |                                                                                                                          | and intensive care units, in contact with patients with COVID-19, working full-time or part-time<br># invited: n=971<br># baseline: n=894<br># follow -up: n.a.<br>Age at baseline:<br><30: n=296<br>31-40: n=374<br>>40: n=210<br>% of females:<br>71.4%<br>Response: 92%<br>Loss-to-follow-up: n.a.                                                                                                       |                                                                                         |                                                                                                                                                                                                                              | <table><tr><td></td><td>Technician</td><td>22</td><td>32</td><td></td></tr></table> <p>* Statistically significant</p> <p><b>Conditions increasing work-related stigmatization:</b> was not investigated</p> <p><b>Measures to prevent/ deal with stigmatization at work:</b> was not investigated</p> <p><b>Unfavourable health consequences associated with stigmatization:</b> PTSD, Results are shown in Tab. 2.</p> <p><b>Stigmatization studied in association with return-to-work:</b> was not investigated</p>                                                                                                                                                                                                                                                                                                        |                | Technician | 22 | 32       |       | + no conflict of interest<br><br>- no information on funding<br>- investigation of the association between PTSD and stigma only with correlation analysis<br>- confounders: age not considered |       |     |      |        |       |      |                                                                                                                                                                                                                                                                                                                                                                                                                              |
|                                          | Technician                                                                                                               | 22                                                                                                                                                                                                                                                                                                                                                                                                          | 32                                                                                      |                                                                                                                                                                                                                              |                                                                                                                                                                                                                                                                                                                                                                                                                                                                                                                                                                                                                                                                                                                                                                                                                               |                |            |    |          |       |                                                                                                                                                                                                |       |     |      |        |       |      |                                                                                                                                                                                                                                                                                                                                                                                                                              |
| 905<br>Zhu, 2020, China<br><br>High risk | <b>Study design:</b> Cross-sectional<br><b>Time of Study:</b> 8 - 10 February 2020<br><b>Follow-up mean, range:</b> n.a. | <b>Job description:</b> HCWs employed in a hospital directly providing services to confirmed or suspected COVID-19 patients<br>Doctors: n=1004<br>Nurses: n=3417<br>Medical technicians: n=641<br><b>Inclusion criteria:</b> none<br># invited: n=6568<br># baseline: n=5062<br># follow-up: n.a.<br><b>Age at baseline:</b> 19-29: 40.1%<br>30-49: 56.4%,<br>>49 years: 3.5%<br><b>% of females:</b> 85.0% | COVID-19 outbreak (2 weeks after the authority in Wuhan suspended all public transport) | Feeling that family and friends avoid contact because of work: 1 item question (answer options: agree, disagree, unsure)<br><br><b>Form of stigmatization:</b><br><u>Self-stigma (perceived):</u><br><u>social exclusion</u> | <p><b>Prevalence of stigmatization:</b><br/>Table 2: Do you feel that family members and friends have avoided contact with you because of your work?</p> <table><tr><th>Answer options</th><th>n</th><th>%</th></tr><tr><td>Disagree</td><td>2,513</td><td>49.6</td></tr><tr><td>Agree</td><td>987</td><td>19.5</td></tr><tr><td>Unsure</td><td>1,562</td><td>30.9</td></tr></table> <p><b>Conditions increasing work-related stigmatization:</b> was not investigated</p> <p><b>Measures to prevent/ deal with stigmatization at work:</b> was not investigated</p> <p><b>Unfavourable health consequences associated with stigmatization:</b> Depression, anxiety, and psychological stress. Results are shown in Tab. 2.</p> <p><b>Stigmatization studied in association with return-to-work:</b> was not investigated</p> | Answer options | n          | %  | Disagree | 2,513 | 49.6                                                                                                                                                                                           | Agree | 987 | 19.5 | Unsure | 1,562 | 30.9 | + study followed STROBE guidelines<br>+ ethical approval by the institutional ethics board of Tongji Hospital<br>+ no conflict of interest<br>+ funding from non-profit organizations<br>+ census sampling (all healthcare workers of the hospital invited)<br>+ recruitment procedure: high response<br>+ pilot-testing of the questionnaire<br>+ measurement of depression, anxiety, and stress with validated instruments |
| Answer options                           | n                                                                                                                        | %                                                                                                                                                                                                                                                                                                                                                                                                           |                                                                                         |                                                                                                                                                                                                                              |                                                                                                                                                                                                                                                                                                                                                                                                                                                                                                                                                                                                                                                                                                                                                                                                                               |                |            |    |          |       |                                                                                                                                                                                                |       |     |      |        |       |      |                                                                                                                                                                                                                                                                                                                                                                                                                              |
| Disagree                                 | 2,513                                                                                                                    | 49.6                                                                                                                                                                                                                                                                                                                                                                                                        |                                                                                         |                                                                                                                                                                                                                              |                                                                                                                                                                                                                                                                                                                                                                                                                                                                                                                                                                                                                                                                                                                                                                                                                               |                |            |    |          |       |                                                                                                                                                                                                |       |     |      |        |       |      |                                                                                                                                                                                                                                                                                                                                                                                                                              |
| Agree                                    | 987                                                                                                                      | 19.5                                                                                                                                                                                                                                                                                                                                                                                                        |                                                                                         |                                                                                                                                                                                                                              |                                                                                                                                                                                                                                                                                                                                                                                                                                                                                                                                                                                                                                                                                                                                                                                                                               |                |            |    |          |       |                                                                                                                                                                                                |       |     |      |        |       |      |                                                                                                                                                                                                                                                                                                                                                                                                                              |
| Unsure                                   | 1,562                                                                                                                    | 30.9                                                                                                                                                                                                                                                                                                                                                                                                        |                                                                                         |                                                                                                                                                                                                                              |                                                                                                                                                                                                                                                                                                                                                                                                                                                                                                                                                                                                                                                                                                                                                                                                                               |                |            |    |          |       |                                                                                                                                                                                                |       |     |      |        |       |      |                                                                                                                                                                                                                                                                                                                                                                                                                              |

| General | Study | Population                                               | Exposure | Outcome | Results | Comments                                                                                                                                                                                                                                                                                                                                                                                                                                                          |
|---------|-------|----------------------------------------------------------|----------|---------|---------|-------------------------------------------------------------------------------------------------------------------------------------------------------------------------------------------------------------------------------------------------------------------------------------------------------------------------------------------------------------------------------------------------------------------------------------------------------------------|
|         |       | <b>Response:</b> 77.1%<br><b>Loss-to-follow-up:</b> n.a. |          |         |         | + using multivariate logistic regression analysis in order to investigate the association between stigmatization and mental health outcomes<br><br>- outcome: measurement of stigmatization with a single question<br>- no consideration of any confounders in the analysis of the association between stigmatization and mental health outcomes<br>- analysis method<br>- no investigation of a temporal relationship possible due to the cross-sectional design |

n = sample size, n.a. = not applicable, n.r. = not reported, SD = standard deviation
